# 1   **Depletion-assisted multiplexed cell-free RNA sequencing reveals distinct** 2   **human and microbial signatures in plasma versus extracellular vesicles**

3   Hongke Wang<sup>1,2,†</sup>, Qing Zhan<sup>1,2,†</sup>, Meng Ning<sup>3,†</sup>, Hongjie Guo<sup>4,†</sup>, Qian Wang<sup>5</sup>, Jiuliang Zhao<sup>5</sup>,  
4   Pengfei Bao<sup>1,2,6</sup>, Shaozhen Xing<sup>1,2</sup>, Shanwen Chen<sup>4</sup>, Shuai Zuo<sup>4</sup>, Mengtao Li<sup>5,\*</sup>, Pengyuan  
5   Wang<sup>4,\*</sup>, Zhi John Lu<sup>1,2,\*</sup>

6

7   <sup>1</sup> MOE Key Laboratory of Bioinformatics, Center for Synthetic and Systems Biology, School of  
8   Life Sciences, Tsinghua University, Beijing 100084, China

9   <sup>2</sup> Institute for Precision Medicine, Tsinghua University, Beijing 100084, China

10   <sup>3</sup> Tianjin Third Central Hospital, Jintang Road, Hedong District, Tianjin, China

11   <sup>4</sup> Translational Cancer Research Center, Division of General Surgery, Peking University First  
12   Hospital, Beijing 100034, China

13   <sup>5</sup> Department of Rheumatology and Clinical Immunology, Peking Union Medical College  
14   Hospital, Chinese Academy of Medical Sciences, Peking Union Medical College, National  
15   Clinical Research Center for Dermatologic and Immunologic Diseases (NCRC-DID), MST  
16   State Key Laboratory of Complex Severe and Rare Diseases, MOE Key Laboratory of  
17   Rheumatology and Clinical Immunology, Beijing 100730, China

18   <sup>6</sup> Peking University–Tsinghua University–National Institute of Biological Sciences Joint  
19   Graduate Program, School of Life Sciences, Tsinghua University, Beijing, China

20

21   \*To whom correspondence should be addressed: Zhi John Lu, Email: [zhilu@tsinghua.edu.cn](mailto:zhilu@tsinghua.edu.cn);  
22   Pengyuan Wang, Email: [pengyuan\\_wang@bjmu.edu.cn](mailto:pengyuan_wang@bjmu.edu.cn); Mengtao Li, Email:  
23   [mengtao.li@cstar.org.cn](mailto:mengtao.li@cstar.org.cn).

24   <sup>†</sup> These authors contributed equally to this work.

# Abstract

Cell-free long RNAs in human plasma and extracellular vesicles (EVs) have shown promise as biomarkers in liquid biopsy, despite their fragmented nature. To investigate these fragmented cell-free RNAs (cfRNAs), we developed a cost-effective cfRNA sequencing method called DETECTOR-seq (depletion-assisted multiplexed cell-free total RNA sequencing). DETECTOR-seq utilized a meticulously tailored set of customized guide RNAs to remove large amounts of unwanted RNAs (i.e., fragmented ribosomal and mitochondrial RNAs) in human plasma. Early barcoding strategy was implemented to reduce costs and minimize plasma requirements. Using DETECTOR-seq, we conducted a comprehensive analysis of cell-free transcriptomes in both whole human plasma and EVs. Our analysis revealed discernible distributions of RNA types in plasma and EVs. Plasma exhibited pronounced enrichment in structured circular RNAs, tRNAs, Y RNAs, and viral RNAs, while EVs showed enrichment in mRNAs and srpRNAs. Functional pathway analysis highlighted RNA splicing-related ribonucleoproteins (RNPs) and antimicrobial humoral response genes in plasma, while EVs demonstrated enrichment in transcriptional activity, cell migration, and antigen receptor-mediated immune signals. Our study indicates the comparable potential of cfRNAs from whole plasma and EVs in distinguishing cancer patients (i.e., colorectal and lung cancer) from healthy donors. And microbial cfRNAs in plasma showed potential in classifying specific cancer types. Our comprehensive analysis of total and EV cfRNAs in paired plasma samples provides valuable insights for determining the need for EV purification in cfRNA-based studies. We

envision the cost-effectiveness and efficiency of DETECTOR-seq will empower transcriptome-wide investigations in the fields of extracellular vesicles and liquid biopsy.

**Keywords:** Cell-free RNA, Extracellular vesicles, Cancer classification, Liquid biopsy,

## Introduction

In recent years, liquid biopsy has emerged as a non-invasive approach for assessing circulating biomarkers in various body fluids, enabling the monitoring of physiologic and disease states [1]. Cell-free RNAs (cfRNAs), given their virtue of being highly dynamic, hold great potential to reflect the pathophysiological processes, thus offering unique opportunities for disease monitoring. Previous reports have suggested that cfRNAs are packaged into various extracellular complexes, such as extracellular vesicles (EVs, including micro-vesicles and exosomes) and non-vesicular ribonucleoproteins (RNPs) [2]. Due to the protection of EV, RNA binding proteins, and/or their self-structures, cfRNAs are capable of being stably present in human bloodstream [3]. While previous studies have predominantly focused on total cfRNAs [4-6] or EV [7-9] cfRNAs in plasma, the transcriptional differences between these two entities remain poorly understood.

Efforts to characterize cfRNAs initially centered around small RNAs like microRNAs (miRNAs) because of the nature of RNA degradation and fragmentation in biofluids. However, miRNAs represent only a small proportion of the human transcriptome [10]. Consequently, investigations have expanded to encompass a broader range of cfRNA species, including messenger RNAs (mRNAs), long non-coding RNAs (lncRNAs), and

circular RNAs (circRNAs) [4-7, 11]. These cell-free long RNA species (>50 nt) have relatively low concentrations in human blood due to the presence of RNases, and they are typically fragmented (~50–200 nucleotides) with incomplete RNA ends [12]. Conventional small RNA-seq approaches, which rely on ligating sequencing adapters based on the 5' phosphate (5' P) and 3' hydroxyl (3' OH) ends of RNA, are inadequate for analyzing these fragmented cfRNAs [13].

Recently, several sequencing approaches have been developed to profile cell-free long RNA fragments in plasma or EVs. Phospho-RNA-seq integrates T4 polynucleotide kinase into ligation-based TruSeq small RNA-seq, enabling the recovery of mRNA and lncRNA fragments lacking 5' P and/or 3' OH ends. However, the libraries generated by Phospho-RNA-seq contain high proportions of ribosomal RNAs (rRNAs) and Y RNAs, limiting the capacity to detect other informative RNA species [12]. Another method, SILVER-seq, captures both small and long cfRNAs from extremely low-input serum samples [14]. However, substantial DNA contamination seemed to be an issue of SILVER-seq [15]. Recently, SMARTer stranded total RNA-seq (hereafter called SMARTer-seq) has been employed in several cfRNA studies [4-7], utilizing a proprietary ZapR and R-probes to deplete unwanted ribosomal sequences [16, 17]. However, as a commercial kit, SMARTer-seq is not specifically optimized for cfRNA library preparation from plasma and is cost-inefficient. Overall, the current cfRNA sequencing approaches were hindered by unwanted RNAs, DNA contamination, and high cost.

Current targeted depletion strategies for unwanted RNAs, such as RiboMinus kits

(Thermo Fisher Scientific), Ribo-Zero technology (Illumina), and RNase H-mediated digestion of RNA:DNA hybrids [16], primarily operate at the RNA level and require relatively intact RNA molecules. Consequently, these methods are unsuitable for low-input and fragmented cfRNA samples. In contrast, the Cas9-mediated targeted DNA cleavage technique, also known as DASH (depletion of abundant sequences by hybridization) [18], provides the capability to selectively cleave cDNA molecules derived from rRNAs during the double-stranded DNA stage after library amplification. Notably, this method only requires the design of a set of specific single-stranded guide RNAs (sgRNAs) to direct Cas9 cleavage of undesirable sequences. Therefore, CRISPR-Cas9 presents a highly advantageous approach for the targeted removal of over-represented sequences in the libraries of low-input and fragmented cfRNA samples derived from plasma and EVs.

In this study, we present an optimized cfRNA sequencing method, DETECTOR-seq (depletion-assisted multiplexed cell-free total RNA sequencing), which utilizes early barcoding and CRISPR-Cas9 to reduce costs and deplete highly abundant, fragmented rRNAs and mitochondrial RNAs (mtRNAs) in human plasma. Subsequently, we used DETECTOR-seq to investigate 113 plasma cfRNA samples (including 61 plasma total RNA and 52 EV RNA libraries), derived from healthy donors, lung and colorectal cancer patients. To the best of our knowledge, this study is the first to compare paired total and EV-selected transcriptomes in the same plasma samples, suggesting their distinct signatures and different utilities in cancer liquid biopsy.

## Results

## Development of DETECTOR-seq to profile cell-free transcriptome

The sequencing of cfRNAs in plasma and extracellular vesicles (EVs) usually meets the following obstacles. First, consistent with previous reports [10], we observed that plasma cfRNAs were degraded with a fragment length of <200 nucleotides (**Figure 1A**). These fragmented cfRNAs are hard to be detected by RNA-seq protocols based on ligation techniques requiring intact RNA ends. Second, ribosomal RNAs (rRNAs) and mitochondrial RNAs (mtRNAs) accounted for ~92% of all clean reads (reads after removing adapters and filtering low-quality reads), while messenger RNAs (mRNAs) and long non-coding RNAs (lncRNAs) collectively made up only a small fraction (~4%) of cell-free transcriptome (**Figure 1B**). It is worth noting that microbe-derived RNAs can also be detected in human plasma with a relatively small fraction (~0.4%) (**Figure 1B**). The high fractions of rRNAs and mtRNAs hamper the detection of other informative RNA species. And they are fragmented into pieces in plasma, making them hard to be removed (**Figures 1C, D**). Third, cfRNAs are usually in the range of hundred picograms to several nanograms per ml of human plasma [14], which can be easily lost and contaminated during purification and amplification. Furthermore, low cfRNA input usually requires 20-24 PCR amplification cycles for library preparation, which produces a high duplication ratio of raw reads. Meanwhile, DNA contamination ignorable in conventional RNA-seq is often over-amplified, causing a big issue in cfRNA-seq [15].

To improve the efficiency and reliability of cfRNA detection, we developed DETECTOR-seq (depletion-assisted multiplexed cell-free total RNA sequencing) to profile

cell-free transcriptome in human plasma (**Figures 1E, F**). DETECTOR-seq captures fragmented cfRNAs with unbiased random priming and template-switching. Then, we adapted and modified a previously described method termed CRISPR/Cas9-based Depletion of Abundant Species by Hybridization (DASH) [18] to remove the abundant sequences derived from ribosomal and mitochondrial RNAs in the complementary DNA (cDNA) library. In this step, guide RNAs (sgRNAs) in the CRISPR-Cas9 are specifically optimized for human plasma cfRNAs (**Supplementary Figures 1,2**), covering the fragmented rRNA and mtRNA sequences (**Figures 1D, E**). The sgRNAs are in vitro transcribed using T7 RNA polymerase, then bind with Cas9 nuclease to form ribonucleoprotein (RNP) complex and induce site-specific cleavage with the endonuclease activity of Cas9 (**Figure 1E**), thus preventing further amplification of cDNAs derived from rRNAs and mtRNAs in the final sequencing library. Meanwhile, DETECTOR-seq utilizes early barcoding during reverse transcription. The multiplexed library will cope with low content of plasma cfRNAs, and reduce experimental time and cost as well. It is also worth mentioning that unique molecular identifiers (UMIs) are added to every sequence in the reverse transcription step, hence DETECTOR-seq is capable of removing PCR duplicates to avoid RNA quantification bias (**Figure 1F**). In addition, we also optimized cfRNA extraction (**Supplementary Figure 3**) and residual DNA digestion (**Supplementary Figure 4**) protocols.

**Analytical validation demonstrating superior performance of DETECTOR-seq**

To examine whether DETECTOR-seq can deplete the unwanted rRNA and mtRNA sequences effectively and specifically, we split a single plasma sample into two equal aliquots for experimental conditions of untreated versus depleted, with six biological replicates. In the untreated samples, reads mapped to rRNAs and mtRNAs collectively represented ~94% of all mapped reads. After CRISPR-Cas9 treatment, these unwanted sequences were decreased to only ~15% of mapped reads, only about one-sixth of the untreated ones (**Figure 2A**). By comparing untreated and depleted aliquots, we observed evident decreases in the normalized coverage of rRNAs and mtRNAs (**Figure 2B**). Meanwhile, the expression levels of detected genes other than rRNAs and mtRNAs between the untreated and depleted aliquots were well correlated, indicating minimal off-target effect (Pearson correlation,  $R = 0.92$ ,  $P\text{-value} < 2.2 \times 10^{-16}$ ; **Figure 2C**). By comparing the cfRNA expression profiles obtained from DETECTOR-seq and SMARTer-seq, we found that the expression levels of detected genes using these two methods were also well correlated (Pearson correlation,  $R = 0.90$ ,  $P\text{-value} < 2.2 \times 10^{-16}$ ; **Figure 2D**). In summary, the above results demonstrate the efficient and specific depletion of unwanted sequences in DETECTOR-seq.

To further evaluate the performance of DETECTOR-seq, we prepared cfRNA libraries in a 3-plex, 4-plex, or 5-plex manner determined by RNA concentrations. The total read numbers of different barcoded samples in one multiplexed pool were relatively uniform, varying less than 1.5-fold in the 3- and 4-plex samples and less than 3-fold in the 5-plex samples (**Supplementary Figure 5A**). In addition, the UMI strategy in DETECTOR-seq



retained significantly more reads than the non-UMI approach after duplicated reads were removed (**Supplementary Figure 5B**). And a sharp edge of reads' distribution across exon-intron splice junctions suggested that the majority of DNA contamination was effectively removed (**Supplementary Figure 5C**). To evaluate the impact of plasma input volume on the number of detected genes, we sequenced cfRNAs with 200, 400, 600, 800, and 1000  $\mu$ L of plasma aliquots from the same individual with five biological replicates. Around 4000 genes were detected with the minimum (i.e., 200  $\mu$ L) volume. The detected gene number linearly increased until a plateau between 800 and 1000  $\mu$ L, suggesting the detected genes would be saturated after 1 mL of plasma (**Supplementary Figure 5D**). While highly correlated cfRNA expression levels were observed within technical triplicates (R1-R3), the correlations were slightly decreased between biological triplicates (N1-N3) (**Supplementary Figure 5E**). Furthermore, based on ERCC RNA Spike-In Mix, we found a high correlation between expected and observed levels of transcript abundance (Pearson correlation,  $R = 0.91$ ,  $P\text{-value} < 2.2 \times 10^{-16}$ ; **Supplementary Figure 5F**). These results not only demonstrate DETECTOR-seq's high accuracy and reproducibility but also suggest its capability of capturing subtle differences in cfRNA profiles between different individuals.

Then, we randomly subsampled a dataset ( $n=24$ ) of DETECTOR-seq for saturation analyses of detected UMIs (transcripts) and genes. Although the detected UMIs kept increasing when more reads in 1ml plasma were sequenced (**Supplementary Figure 5G**), the detected gene numbers were quickly saturated at approximately 5 million genome-

aligned reads (**Supplementary Figure 5H**). These results indicate that DETECTOR-seq achieves saturation of cfRNA detection at a low sequencing depth.

# **Better contamination control and cost-effectiveness of DETECTOR-seq than other cfRNA-seq methods**

We benchmarked the performance of DETECTOR-seq compared to three other cfRNA-seq methods, including Phospho-RNA-seq [12], SILVER-seq [14], and SMARTer-seq [19].

The number of samples used in the comparison was listed in **Supplementary Table 5**.

Within the total genome-aligned reads, DETECTOR-seq and SMARTer-seq had comparable ratios of exonic reads (~70%), while those of SILVER-seq and Phospho-RNA-seq were under 40% (**Figure 3A**). The lower ratio of exonic reads for SILVER-seq was

presumably due to severe DNA contamination according to a previous report [15]. We also

visualized the read coverage across exon boundary sites flanked upstream and

downstream by 50 bp, where DETECTOR-seq and SMARTer-seq showed more evident

decreases of read coverage from exon to intron/intergenic region than SILVER-seq and

Phospho-RNA-seq (**Figure 3B**). As far as we know, all of the four cell-free RNA-seq

methods should preserve the strand specificity of RNAs. Thus, the enrichment of exons'

sense over antisense reads of DETECTOR-seq and SMARTer-seq further confirmed their

reads' quality (**Figure 3C**). The above results demonstrate that DETECTOR-seq and

SMARTer-seq have better DNA contamination control than SILVER-seq. It was worth

noting that Phospho-RNA-seq was developed from a small RNA-seq method, and the read

coverage across exon boundary sites and the enrichment of exons' sense over antisense reads may be affected by the read distribution of small RNAs.

In addition, we showed that DETECTOR-seq displayed a higher ratio of reads mapped to human genome (~71%) than those of SMARTer-seq (~48%) because DETECTOR-seq removed mitochondrial RNAs more efficiently than SMARTer-seq (**Figure 3D**). Furthermore, because of its early barcoding and multiplexing strategy, DETECTOR-seq can produce more raw reads and genome-aligned reads than the other cfRNA-seq approaches (**Figure 3E, Supplementary Figure 6**). Cost details were explained in Supplementary Tables 6 and 7. Overall, by summarizing and comparing key characteristics of these approaches (**Figure 3F**), we collectively demonstrate that DETECTOR-seq has better contamination control and more efficient cost than the other cfRNA-seq methods.

## **Distinct human and microbial RNA signatures in plasma versus extracellular vesicles**

Subsequently, we employed DETECTOR-seq to conduct pairwise investigations of total cfRNAs and EV cfRNAs in human plasma (**Figure 4A**). A proportion of cfRNAs are enclosed inside EVs such as MVs and exosomes [20]. Meanwhile, it is also reported that a significant proportion of cfRNAs are not within EVs but associated with proteins to form non-vesicular RNPs [21]. Although both plasma total cfRNAs [4-6] and EV cfRNAs [7, 9] have been used in liquid biopsy studies, a pairwise comparison of their distinct signatures

and utilities has not been conducted yet.

In this study, a total of 139 plasma cfRNA samples were sequenced, which included samples obtained from healthy donors as well as patients with lung cancer and colorectal cancer (**Supplementary Figure 7, Supplementary Table 10**). EVs were purified using a membrane affinity column, concentrating particles predominantly within the size range of 50 to 200 nm, with a peak around 110 nm. Morphological examination using transmission electron microscopy confirmed the presence of the characteristic cup-shaped structure commonly associated with EVs (**Figure 4B**). After conducting quality control (QC) procedures on the RNA samples and sequencing data, a total of 113 datasets passed the QC criteria (**Supplementary Figures 7-9**). Out of these 113 datasets, 61 were derived from total cfRNA-seq of plasma, while 52 were obtained from EV cfRNA-seq of plasma. Among them, 44 datasets were paired, meaning they originated from the same plasma samples. In the following description, total cfRNA-seq of plasma and EV cfRNA-seq of plasma will be abbreviated to *Plasma* cfRNA and *EV* cfRNA, respectively.

From a general view, there was a high degree of similarity between *Plasma* and *EV* cfRNAs, with ~90% of aligned reads mapping to human genome and ~10% mapping to microbe genomes (**Figure 4C**). For human cfRNAs, mRNA, lncRNA, and circRNA were the major RNA types. For microbial cfRNAs, the most abundant phylum was *Proteobacteria*, followed by *Firmicutes* and *Actinobacteria*. The human and microbial RNA compositions resembled previous reports [19, 22].

In addition, distinctive signatures were revealed for the first time by our pairwise

comparison between *Plasma* (n = 44) and *EV* (n = 44) cfRNAs (all samples were paired). We first observed that *Plasma* cfRNAs had more short fragments (20~100 nt), while *EV* cfRNAs had more long fragments (>100 nt) (**Supplementary Figure 10**). We also observed that structured tRNAs, Y RNAs, and circRNAs were enriched in *Plasma* cfRNAs, while mRNAs and signal recognition particle RNAs (srpRNAs) were enriched in *EV* cfRNAs (**Figure 4D**). These findings align with a previous study that reported a significant enrichment of tRNA and Y RNA fragments in extracellular RNPs [2]. Moreover, we also found that the relative abundance of circRNAs was slightly higher in *Plasma* cfRNAs than *EV* cfRNAs (median 13.6% vs. 8.8%,  $P$ -value < 0.0001, Wilcoxon rank sum test; **Figure 4D**, **Supplementary Figure 11**), perhaps due to its circle-like structure resisting degradation outside of EVs. We totally identified 13 circRNAs differentially enriched in *Plasma* versus *EV* cfRNAs. Only one of them, hsa\_circ\_0048555, was enriched in EVs (**Supplementary Figure 12**). Reads mapped to the back-spliced junction were used to calculate the enrichment.

A recent study provided a framework to infer cell types of origin of the cell-free transcriptome [23]. We utilized this method and found a high similarity of the cell types of origin between *Plasma* and *EV* transcriptomes (**Figure 4E**). Platelets and erythrocytes were inferred as the major origins for both *Plasma* and *EV* cfRNAs, which was in agreement with the previous study [23]. Intriguingly, we found non-blood cells contributed more to *EV* cfRNAs than to *Plasma* cfRNAs ( $P$ -value < 0.01, Wilcoxon rank sum test; **Figure 4E**). Therefore, the diversities of cell types of origin (measured by Simpson's index)

of *EV* cfRNAs were slightly higher than those of *Plasma* cfRNAs (0.75 vs. 0.70, *P*-value < 0.01, Wilcoxon rank sum test; **Figure 4E**).

A noteworthy discovery has been made regarding the presence of RNAs originating from transposable elements and other repetitive elements in the cell-free transcriptome [24]. In our current investigation, we provide evidence demonstrating a significant enrichment of cfRNAs derived from transposable elements (TEs) in *Plasma* cfRNAs compared to *EV* cfRNAs. These transposable elements include short interspersed elements (SINEs), long interspersed elements (LINEs), long interspersed elements with long terminal repeats (LTR), and DNA transposons (**Figure 4F**).

We also identified distinct microbe genera in *Plasma* and *EV* cfRNAs (**Supplementary Figure 13**). While there was no significant difference in the ratio of microbial reads between *Plasma* and *EV* cfRNAs, we did observe a significant increase in cfRNAs mapped to viral genomes in *Plasma* cfRNAs (**Figure 4G**). Meanwhile, viruses such as *Senecavirus*, *Cheravirus*, *Orthopoxvirus*, *Tenuivirus*, and *Rhadinovirus* were enriched in *Plasma* cfRNAs, while *Intestinimonas*, *Mordavella*, and *Jonquetella* were enriched in *EV* cfRNAs (**Supplementary Figure 13**). In summary, the above comparison results have revealed distinct molecular characteristics between *Plasma* and *EV* cfRNAs in terms of fragment size, RNA species, cell types of origin, TE RNAs and microbe genera.

## **Functional pathways and sequence motifs of selective *Plasma* and *EV* cfRNAs**

To find selective functions and motifs of cfRNAs in EVs, we identified 545 selectively

distributed RNAs showing significantly differential abundance between *Plasma* and *EV* transcriptomes ( $|\text{Fold-change}| > 1$  and  $\text{FDR} < 0.1$ ; **Figure 5A, Supplementary Figure 14**). Among them, 271 cfRNAs were enriched in *Plasma*, while 274 cfRNAs were enriched in *EVs*. We investigated the functional roles and biological pathways of these selective cfRNAs (**Figure 5B, Supplementary Figure 14**). Based on KEGG pathway enrichment analysis, we found that the selective RNAs elevated in *Plasma* were significantly enriched in terms associated with RNA splicing, RNP (e.g., mRNA 5' splice site recognition, U1 snRNP, spliceosomal snRNP complex and Sm-like protein family complex), antimicrobial and innate immune responses. Meanwhile, the selective RNAs that were enriched in *EVs* were primarily associated with DNA binding transcription factor activity, focal adhesion, cell-substrate junction, and T cell receptor signaling immune pathway. Notably, we also found different immune pathways enriched in the selective cfRNAs of *Plasma* versus *EVs* (**Figure 5B, Supplementary Figure 15**). The organ or tissue-specific immune response and antimicrobial humoral response immune signaling pathways are enriched in *Plasma* cfRNAs, while defense response to other organisms, Fc receptor signaling pathway, T cell receptor signaling pathway are enriched in *EV* cfRNAs (**Supplementary Figure 15**).

We further investigated sequence motifs and their associated RNA binding proteins (RBPs) for the selective cfRNAs (**Figure 5C, Supplementary Figure 16**). And we found that the selective cfRNAs enriched in *Plasma* contained binding motifs/sites for ABCF1, a protein that plays a role in innate immune response [25]; SFPQ, a splicing factor; LARP4, a La RNP; TROVE2, a Y RNA binding protein; and DKC1, a snoRNP. Meanwhile, the

selective cfRNAs enriched in *EVs* contained binding motifs/sites for PUM1, a protein that participates in human innate immune response [26]; BCLAF1, a transcription factor; HNRNPU, a transcription suppressor; PCBP1, a previously reported immune checkpoint [27]; APOBEC3C, an RNA editing enzyme. These enriched motifs and their associated RBPs were consistent with the biological functions of the selective cfRNAs revealed above.

### **Specific cancer-related signals in *Plasma* and *EV* cfRNAs**

Next, we compared the potential of *Plasma* cfRNAs and *EV* cfRNAs to discriminate between cancer patients and healthy individuals in a proof-of-concept cohort. We sequenced cfRNAs in the plasma samples of lung cancer (LC, Plasma n = 19, EV n = 19, 18 of them paired) and colorectal cancer (CRC, Plasma n = 23, EV n = 19, 19 of them paired) patients (**Supplementary Figure 7**). To maximize the sample size, we merged CRC and LC together as a combined cancer group. Based on differential expression analysis between this combined cancer group (Plasma n = 42, EV n = 38, 37 of them paired) and normal controls (NC, Plasma n = 19, EV n = 14, 7 of them paired) using the criteria of  $|\log_2\text{fold-change}| > 1$  and  $\text{FDR} < 0.05$ , we defined a set of cancer-relevant cfRNAs in both *Plasma* and *EVs* (**Supplementary Figure 17**). Interestingly, when we intersected the cancer-relevant cfRNAs and selective cfRNAs mentioned above, we found that cancer-relevant cfRNAs accounted for 59.8% (162/271) of the selectively enriched cfRNAs in *Plasma*, whereas they only represented 6.9% (19/274) of the selectively enriched cfRNAs in *EVs*. Therefore, cancer-relevant cfRNAs appear to be more enriched in *Plasma's*



selective cfRNA fraction. **(Figure 6A)**. We also found that enriched functions of these cancer-relevant *Plasma* cfRNAs were termed as RNA splicing, snRNP signals, etc **(Figure 6B)**, which were consistent with the enriched pathways of *Plasma* cfRNAs revealed in **Figure 5B**.

Based on these selectively distributed cancer-relevant cfRNAs, we endeavored to discriminate cancer patients from NCs. Although the selective cfRNAs in *Plasma* performed slightly better than those in *EVs* (average AUROC: 0.909 versus 0.877, **Figure 6C, Supplementary Figure 18**), comparable performances were observed between *Plasma* and *EV* cfRNAs when a large number of non-selective cfRNAs were included as well (average AUROC: 0.936 versus 0.953, **Figure 6D, Supplementary Figure 19**). Collectively, these results imply that the purification of *EV* can reveal distinct cancer signals, but it has a very subtle effect on the accuracy of detection of cancer patients from healthy controls.

We further assessed the potential of cfRNAs (human-derived only) in *Plasma* and *EV* for classifying CRC from LC. Initially, neither cfRNAs in *Plasma* or *EV* exhibited strong classification potential (average AUROC: 0.628 versus 0.659, **Figure 6E, Supplementary Figure 20**). A recent study revealed that microbe-derived cfRNAs in human plasma reflect cancer-type-specific information [19]. Based on the RNA abundance of the contamination-filtered microbe genera, we found the microbial cfRNAs improved the classification of cancer types for both *Plasma* and *EV* cfRNAs (average AUC: 0.898 versus 0.772, **Figure 6E, Supplementary Figure 20**).

Notably, the microbial cfRNAs in *Plasma* performed better than those in *EV*. Consistently, we also found more cancer-type-specific features in *Plasma* cfRNAs than in *EV* cfRNAs (**Figure 6F**). We identified the microbial features recurrently showing differential abundance between CRC and LC in all of the 20 bootstrap samplings. The abundance of top recurrent microbe genera, along with fold-change and false discovery rates were illustrated (**Figure 6G**). For instance, we observed a higher relative abundance of *Methanothrix* in CRC compared to LC using *EV* cfRNA-seq data. This is consistent with a previous study reporting that *Methanothrix soehngenii* was enriched in gut microbiome of CRC patients [28]. Meanwhile, many cancer-relevant viral RNAs in *Plasma* classified cancer types, consistent with the observation of more viral RNAs detected in *Plasma* than in *EVs* (**Figure 4F**). For instance, *Plasma* cfRNA-seq data revealed a higher abundance of *Alpha-polyomavirus* and *Beta-polyomavirus*. Supportively, some polyomaviruses were also reported to be detectable in gastrointestinal tract and respiratory aspirates [29]. These findings suggest that microbe-derived cfRNAs in *Plasma*, at least in this small cohort with limited sample size, present promising but yet poorly investigated signatures for specific cancer types. Further validation in larger cohorts is required to establish the clinical utility and significance of these preliminary findings.

## Conclusion and Discussion

**Conclusions.** In summary, this study introduced a depletion-assisted cost-effective cfRNA profiling approach, termed DETECTOR-seq, which overcomes challenges associated with

low quantity and low quality of fragmented cfRNAs, over-represented rRNAs and mtRNAs, DNA contamination, and high costs. Using DETECTOR-seq, we recapitulated molecular characteristics of *Plasma* and *EV* cfRNAs and identified their distinct human and microbial signatures, thus illustrating the gain and loss of certain cfRNA signals due to EV purification. Our work provides a practical reference for researchers engaged in plasma and EV cfRNA-based liquid biopsy (**Table 1**). Moreover, we envision that DETECTOR-seq would be a useful tool to facilitate further studies in the fields of extracellular RNA biology and plasma or EV cfRNA-based liquid biopsy, paving the way for advancements in both fundamental research and translational medicine.

**Technologies utilized and optimized in DETECTOR-seq.** Plasma cell-free transcriptome remains challenging to study owing to the low quantity and quality of fragmented cfRNAs [11]. Over-represented rRNA and mtRNA species [12], DNA contamination [15], and high cost are still the major issues of cfRNA sequencing. Multiple technologies were included in DETECTOR-seq to address these issues (**Figure 4F**). First, DETECTOR-seq captures fragmented cfRNAs with random priming and template-switching strategies, which have been proven to be highly efficient in single-cell RNA-seq [30]. Second, the early barcoding protocol of DETECTOR-seq enables us to prepare cfRNA libraries in a multiplexed manner, thus reducing the volume of required plasma and experimental costs. In fact, DETECTOR-seq is capable of detecting cfRNAs with a low input volume of 0.2 to 1 mL plasma with a 2- to 6-fold cost saving compared to existing

approaches. Third, with UMIs tagging to cDNAs of RNA fragments, DETECTOR-seq can accurately quantify the low-quantity cfRNAs. Fourth, by optimizing the procedures of RNA extraction and residual DNA digestion (**Supplementary Figures 3-4**), DETECTOR-seq avoids the potential contamination of genomic DNAs. Fifth, DETECTOR-seq uses CRISPR-Cas9 technology to deplete rRNA and mtRNA sequences. A CRISPR-based depletion strategy, DASH (Depletion of Abundant Sequences by Hybridization) [18] has been utilized in other fields, such as ATAC-seq [31], small RNA-seq [32], bacterial RNA-seq [33], Ribo-seq [34] and single-cell total RNA-seq [35]. Here, we applied this CRISPR-based method to cfRNA sequencing and designed a specific set of sgRNAs for human plasma (**Supplementary Figures 1,2**). Of note, our sgRNAs target almost the entire length of human rRNAs and mtRNAs, enabling the use of our guides to deplete rRNAs and mtRNAs from any intact or fragmented RNA samples, regardless of the specimen type. This underscores the versatility of our approach beyond plasma samples.

**Plasma vs. EV in cancer detection and cancer type classification.** Researchers have used both *Plasma* cfRNA-seq [4-6] and *EV* cfRNA-seq [7, 20, 36-38] to identify disease biomarkers. By pairwise comparison between *Plasma* and *EV* cfRNA, we found that both of them can distinguish cancer patients from controls with comparable performance. However, cancer types can be better classified with microbe-derived features in *Plasma* cfRNAs than those in *EV* cfRNAs.

**Distinct signatures in *Plasma* vs. *EV* cfRNAs.** This study has brought new insights into distinct cfRNA signatures in *Plasma* versus *EVs*. *Plasma* contains miscellaneous

cfRNAs released from alive or apoptotic cells, while RNAs in *EV* cargos are considered to be secreted actively by cells for functional roles in intercellular communications [39]. This study revealed distinct biological pathways, enriched motifs, and RBP-binding sites in *Plasma* vs. *EV* cfRNAs. We also found that short RNA fragments (20 to 100 nt) associated with RNPs were enriched in *Plasma* cfRNAs, indicating higher degradation extent of non-vesicular RNAs than those of *EV* RNAs.

**Limitations of this study.** While analyzing paired plasma samples can increase statistical power, it is important to note that the conclusions regarding the comparison of cfRNAs in *Plasma* and *EVs* for cancer differentiation in this study are still preliminary due to the small sample size. These results serve as a proof-of-concept exploration of DETECTOR-seq's potential for uncovering intriguing insights in real-world clinical samples. Larger-scale cohorts are required to validate these findings and establish their clinical utility. Furthermore, although DETECTOR-seq offers several advantages compared to other approaches, there is room for further improvement. For instance, the efficiency of random priming in DETECTOR-seq is influenced by the fragment length of RNAs, which can introduce bias in the library preparation. And DETECTOR-seq involves several purification steps to eliminate by-products such as empty library constructs, adapter dimers, and excessive primers. These purification procedures tend to retain longer RNA fragments, resulting in the discarding of RNA fragments shorter than 50 nucleotides, along with the by-products. To obtain a complete spectrum of cfRNAs, including both small and long fragments, DETECTOR-seq could be modified by incorporating alternative strategies

445 such as poly(A) tailing [40, 41].

## **Materials and Methods**

### **Cohort design**

Seventy-five participants, including patients with colorectal cancer (n=24), lung cancer (n=20), and healthy controls (n=31), were enrolled in this study. Samples were obtained between November 2018 to January 2022. Individuals with colorectal, lung cancer and healthy controls were recruited from Peking University First Hospital. The characteristics of participants in this study were summarized (**Supplementary Table 9**).

### **Sample collection**

Peripheral whole blood samples were collected in EDTA-coated vacutainer tubes for each participant. Blood samples of patients with cancer were collected before any treatment of surgery, chemotherapy, or neoadjuvant chemotherapy. Within 2 hours after blood collection, blood samples were centrifuged at 1,900g for 30 min at room temperature. Plasma was separated and then centrifuged at 16,000g for another 10 min at 4 °C to remove cellular debris. All plasma samples were aliquoted and stored at -80 °C until analysis.

### **Plasma and extracellular vesicles RNA extraction**

Cell-free RNAs (cfRNAs) were extracted from 1 ml of plasma using QIAzol Lysis Reagent (Qiagen, 79306) according to the manufacturer's instructions. The upper, aqueous phase containing cfRNAs was mixed with 1 volume of ethanol (95-100%) and then added to the

Zymo-Spin column (Zymo, R1016) for RNA binding. Samples were subsequently washed, eluted, and treated with DNase I (TaKaRa, 2270A) for 20 min at 37 °C. Following residual DNA digestion, cfRNAs were then purified and concentrated into 6 µl using an RNA Clean and Concentrator-5 kit (Zymo, R1016). Plasma extracellular vesicles (EVs) were purified by a membrane-affinity approach using an exoRNeasy Midi Kit (Qiagen, 77144) following the manufacturer's instructions [42]. EVs were eluted with 400 µl of elution buffer and characterized by transmission electron microscopy (TEM) and nanoparticle tracking analysis (NTA). For RNA isolation, EVs were lysed on the exoRNeasy column using QIAzol Lysis Reagent, and EV RNAs were extracted and purified using Zymo-Spin column as mentioned above.

#### **Optimization of cell-free RNA extraction and residual DNA digestion.**

RNA extraction is one of the most critical steps for low-input RNA-seq. To this end, we compared three cfRNA extraction approaches, including QPCB (QIAzol lysis, phenol-chloroform extraction, and column binding), Norgen (Plasma/Serum Circulating and Exosomal RNA Purification Kit), and QPIP (QIAzol lysis, phenol-chloroform extraction, and isopropanol precipitation). QPCB was considered the best approach for cfRNA extraction.

#### **(Supplementary Figure 3).**

In previous reports, DNA contamination has been emphasized as a hinder to the cfRNA study [15]. Therefore, we examined two major residual DNA digestion approaches: On-column vs. In-buffer (On-column: residual cell-free DNA was digested on the spin-



column during RNA extraction; In-buffer: DNA was digested in the aqueous buffer after RNA extraction). We observed a significantly higher human genome mapping ratio and exonic read ratio with In-buffer DNA digestion than On-column approach ( $P$ -value < 0.0001, Wilcoxon rank sum test; **Supplementary Figure 4**), suggesting In-buffer DNA digestion was more effective to a certain extent. DETECTOR-seq was carried out in the following assays with RNAs extracted using QPCB and residual DNA digested with an In-buffer approach unless specified.

## **Reverse transcription**

Cell-free RNAs were captured using random primers with a unique sample barcode and then reverse transcribed with SMARTScribe reverse transcriptase (Clontech, 639538) and template-switching oligos tagging 8-nt UMI sequences. Sample barcodes were designed in R using the DNABarcodes package [43]. We generated barcodes with a length of 4 nucleotides and a minimum Hamming distance of 3 and filtered self-complementary sequences, triplets, and sequences that have an unbalanced ratio of bases G or C versus A or T. PEG 8000 (Beyotime, R0056-2ml) was used as molecular crowding reagent to further improve the efficiency of reverse transcription reaction [44]. The 20- $\mu$ l reaction mixture was incubated at 42 °C for 90 min with a heat inactivation step at 70 °C for 10 min. Primers for the reverse transcription of DETECTOR-seq were shown in **Supplementary Table 3**.

## Quantitative PCR analysis

The total abundance level of *Plasma* or *EV* cfRNAs was assessed by amplifying a fragment from the human gene of *ACTB* spanning the exon-exon junction (ACTB-ee). The level of residual DNA contamination was measured by amplifying a short fragment from *ACTB* within intron regions (ACTB-i). We measured the microbiome contamination by the threshold cycle (Ct) value difference of the ACTB-ee and the bacterial 16S ribosomal RNA V4 fragment (16S-V4). The 2.5 µl of cDNA template was amplified in a final volume of 20 µl using the FastFire qPCR PreMix (SYBR Green) (TIANGEN, FP207). Samples with low RNA content (Ct of ACTB-ee > 32) or high DNA contamination (Ct of ACTB-i < 35), or high bacterial contamination ( $\Delta Ct$  (ACTB-ee – 16S-V4) > 5) were excluded for further analysis. We summarized the quality control primers for *Plasma* and *EV* cfRNA samples (Supplementary Table 1).

## Design of guide RNAs (gRNAs)

To remove highly abundant sequences (rRNAs and mtRNAs) in the cfRNA library of human plasma, we designed 302 and 315 high-quality single guide RNAs (sgRNAs) specifically targeting the ribosomal and mitochondrial RNA sequences (Supplementary Figure 1). The sgRNAs were selected and filtered by DASHit [45] and Benchling (<https://www.benchling.com/crispr>) based on the following criteria: 1) off-target score (specificity score) and on-target score (sensitivity score); 2) poorly structured sgRNAs were excluded; 3) cover approximately every 50 bp over the target sequences. First,

candidate guides in rRNA (4324) and mtRNA (1907) were outputted by scanning all the protospacer adjacent motif (PAM) sequences. Meanwhile, the transcriptome of hg38 (excluded rRNA and mitochondrial RNA) was also scanned for all CRISPR sites as an off-target list. Second, we excluded off-target guides and filtered poorly structured guides, including a). G/C frequency too high ( $> 15/20$ ) or too low ( $< 5/20$ ); b). Homopolymer: more than 5 consecutive repeated nucleotides; c). Dinucleotide repeats: the same two nucleotides alternate for  $> 3$  repeats; d). Hairpin: complementary subsequences near the start and end of a binding site, causing a hairpin. And we got 1191 rRNA guides and 1425 mtRNA guides as qualified guides. Next, we downloaded guides designed by Benchling to score our guides and remove redundant guides (overlapped with each other), and kept guides with higher on-target and off-target scores. Thus, we got a pool of filtered guides. Finally, we manually added some guides to cover the non-guide regions and SNP sites and obtained a final sgRNA pool containing 302 guides targeting rRNA sequences and 315 guides targeting mtRNA sequences. The DNA templates of final sgRNAs were synthesized through a one-step PCR using two paired primers to achieve the addition of T7 promoter and guide RNA scaffold sequences (Primers for preparation of sgRNA DNA templates were shown in **Supplementary Table 2**). The final sgRNAs were in vitro transcribed using T7 RNA polymerase (NEB, E2050) and stored at  $-80^{\circ}\text{C}$ .

#### **DETECTOR-seq library preparation**

The 17.5  $\mu\text{l}$  of remaining samples with similar cDNA content ( $\Delta\text{Ct}$  of ACTB-ee  $< 1$ ) were

pooled for 3-, 4- or 5-plex library preparation. The pooled cDNAs were pre-amplified using SeqAmp DNA Polymerase (Clontech, 638509) with the following PCR setup: initial denaturation at 94 °C for 1 min, denaturation at 98 °C for 15 s, annealing at 55 °C for 30 s, elongation at 68 °C for 30 s, and final elongation at 68 °C for 10 min. Pre-amplification was repeated for 6 cycles, and the DNA was cleaned and size-selected using Hieff NGS DNA selection Beads (Yeaden, 12601ES56) at a ratio of 1:0.8 of DNA to beads twice. The DNA was eluted with the 20 µl CRISPR-Cas9 reaction mix consisting of 300 ng sgRNAs for rRNA sequences, 40 ng sgRNAs for mtRNA sequences, 1× NEBuffer3.1 and 1 µM Cas9 Nuclease, *S. pyogenes* (NEB, M0386). The 20-µl reaction mixture was incubated at 37 °C for 60 min and heat-inactivated at 65°C for 5 min. Following the depletion of DNA fragments derived from rRNAs and mtRNAs, the remaining DNA samples with complete library structure were amplified for 16-18 cycles depending on the initial input. The final clean-up was conducted at a ratio of 1:1 of DNA to beads. The library concentration was measured using a Qubit dsDNA HS Assay Kit (Thermo Fisher, Q32854), and the size distribution of the library was assessed using an Agilent 2100 Bioanalyzer with a High-Sensitivity DNA analysis kit (Agilent, 5067-4626). DETECTOR-seq libraries were sequenced on an Illumina HiSeqX platform to a depth of 10 million 150 bp paired-end reads per sample. Primers for PCR amplification of DETECTOR-seq were shown in **Supplementary Table 4.**

## **Sequencing data processing**

Raw sequencing data were demultiplexed using sabre (<https://github.com/najoshi/sabre>) according to sample barcodes. UMI sequences were extracted using UMI-Tools [46]. Adapters were removed by cutadapt, and read pairs with an average quality score below 30 in either read were removed. The remaining read pairs were then mapped to ERCC's spike-in sequences, NCBI's UniVec sequences, human rRNA sequences, human mtRNA sequences, human genome (hg38), and circular RNA sequentially using STAR (version 2.5.3a\_modified) [47]. The UMI-Tools package was used to remove duplicated reads caused by PCR amplification. Finally, a gene count matrix was generated using featureCounts v1.6.2 [48] with the GENCODE v38 annotation. Unmapped reads were classified using kraken2 [49] to obtain microbe (including bacterial, archaeal, and viral) genus abundance. Potential contaminations in genera were filtered before downstream analysis as in previously published work [19]. We summarized all the datasets for the development, validation, and application of DETECTOR-seq in **Supplementary Table 8**.

### **Quality control (Sample filtering and Gene filtering)**

To filter low-quality DETECTOR-seq datasets, the following quality control criteria were used (**Supplementary Table 7**): (1) raw reads > 4 M; (2) clean reads (reads remained after trimming low-quality and adapter sequences) > 3.8 M; (3) ribosomal RNA reads < 20%; (4) mitochondrial RNA reads < 20%; (5) genome-aligned reads > 2 M; (6) de-duplicated RNA reads > 0.1 M. Next, we retained genes with TPM > 1 in at least 50% of samples or filtered genes by filterbyExpr of edgeR package [50].

593

## 594 **Differential expression and functional enrichment analysis**

595 The count matrix of gene expression or microbe genus abundance was normalized using  
596 the trimmed mean of M-values (TMM) method in the edgeR package [50]. Differential  
597 expression analysis was conducted using a quasi-likelihood method with  $FDR < 0.1$  to  
598 identify RNAs showing a selective distribution in paired *Plasma* and *EV* samples and to  
599 identify differentially expressed genes (DEGs) ( $|\log_2 \text{fold-change}| > 1$  and  $FDR < 0.05$ )  
600 between cancer patients and normal controls. GSEA analysis of GO and KEGG pathway  
601 was carried out using clusterProfiler [51].

602

## 603 **Enrichment analysis of RBP binding motifs/sites**

604 After identifying selective RNAs showing significantly differential abundance between  
605 *Plasma* and *EV* transcriptomes, we conducted an enrichment analysis of RBP (RNA  
606 binding protein) binding motifs/sites using MEME SEA [52]. We first created a gene-wise  
607 “RBP binding hotspot” sequence set by expanding annotated exon junction  
608 sites upstream and downstream by 20 nt and combined with 5' UTR and 3' UTR regions  
609 (GENCODE v38), as these regions were reported to be frequently bound by RBPs [53].  
610 Background sequences were extracted from 500 random subsets of cfRNAs whose  
611 abundance showed no significant difference between *Plasma* and *EV* ( $FDR > 0.1$ ).  
612 Database files of RBP binding motifs/sites for enrichment analysis were annotated from  
613 our previous research [53]. Finally, top enriched RBPs (ranked by *E*-value) were annotated

and summarized, and sequence logo images were created from POSTAR3 database [53] using WebLogo [54].

## Deconvolution of cell types of origin

We applied Nu-SVR to deconvolve the fractions of cell-type-specific RNAs based on Tabula Sapiens version 1.0 (TSP), a multiple-donor whole-body cell atlas spanning 24 tissues and organs as previously reported [23].

## Cancer classification

We normalized and scaled gene expression and genus abundance for evaluating the cancer-differentiating capacity of human and microbial features in *Plasma* and *EV* cfRNAs. All of the 61 *Plasma* and 52 *EV* DETECTOR-seq datasets passed QC were used, thus including as many cases as possible in the training and test sets. Most of the cancer samples were paired between *Plasma* and *EV* (CRC samples: *Plasma* 23, *EV* 19, 19 of them were paired; LC samples: *Plasma* 19, *EV* 19, 18 of them were paired; NC samples: *Plasma* 19, *EV* 14, 7 of them were paired). The data were trained and tested with bootstrapping sampling, which was randomly repeated 20 times. For human RNAs, a quasi-likelihood method was used for the differential expression analysis in each bootstrapping procedure. In Figure 7C, differentially expressed features with  $|\log_2\text{fold-change}| > 1$  and  $\text{FDR} < 0.05$  overlapped with RNAs that were enriched in *Plasma* or *EV* (defined in Figure 6A) were further used to fit a random forest classifier. In Figure 7D, we

selected the top 200 features ranked by FDR in each bootstrapping procedure. For microbial RNAs, we selected all of the microbe genera with  $|\log_2\text{fold-change}| > 1$  and  $\text{FDR} < 0.1$  in each bootstrapping procedure. For the combination of human RNAs and microbial RNAs, we combined human gene expression and genus abundance and selected the top 200 features ranked by FDR. The area under the receiver operating characteristic curves (AUROC) was calculated from the final probability using the pROC [55] package in R.

# **Cost estimation**

The cost for cell-free RNA library preparation of DETECTOR-seq was determined using the sum of the price for each component used in our protocol. The price of SMARTer Stranded Total RNA-Seq Kit v2-Pico Input Mammalian (TaKaRa, 634413) was searched on the official website of TaKaRa for the estimation of SMARTer-seq. The cost of Phospho-RNA-seq was estimated using T4 polynucleotide kinase (NEB, M0201S) and TruSeq small RNA kit (Illumina, RS-200-0012). In the case of SILVER-seq, there was no publicly available step-by-step protocol, thus the cost of SILVER-seq was estimated by the Ovation SoLo RNA-Seq Kit (NuGEN, 0500-96). In all cases, the prices listed in **Supplementary Tables 6 and 7** included sales tax. Because the costs of SMARTer-seq, Phospho-RNA-seq, and SILVER-seq were estimated using commercial kits (including additional selling costs and profits), for a fair comparison, we determined the cost of DETECTOR-seq as twice the calculated price.



656

## 657 **Declarations**

### 658 **Ethics approval and consent to participate**

659 This study was approved by the institutional review board of Peking University First  
660 Hospital (2018-15). Informed consent was obtained from all patients.

661

### 662 **Consent for publication**

663 Not applicable.

664

### 665 **Availability of data and materials**

666 Data generated with DETECTOR-seq are available at the Gene Expression Omnibus  
667 under accession number GSE216561. For benchmarking, we used the following datasets:  
668 GSE126049 (Phospho-RNA-seq), GSE131512 (SILVER-seq), and GSE174302  
669 (SMARTer-seq). *For editors and reviewers: the data can be downloaded from the GEO*  
670 *with a secure token: cnwpoiufhunbqd.*

671

### 672 **Declaration of interests**

673 A patent application on the described technology has been filed by HKW and ZJL. Other  
674 authors declare no conflict of interest.

675

### 676 **Funding and Acknowledgments**

This work is supported by National Natural Science Foundation of China (32170671, 8237061277 and 81902384), the Capital's Funds for Health Improvement and Research (CFH 2022-2-4075), the National Key Research and Development Plan of China (2022ZD0117700), Tsinghua University Guoqiang Institute Grant (2021GQG1020), Tsinghua University Initiative Scientific Research Program of Precision Medicine (2022ZLA003), Tsinghua University Spring Breeze Fund (2021Z99CFY022). This study was also supported by Bayer Micro-funding, Bio-Computing Platform of Tsinghua University Branch of China National Center for Protein Sciences.

# **Authors' contributions**

HKW, QZ, and ZJL conceived and designed the project; HKW developed DETECTOR-seq and generated the datasets; SZ and PYW collected the clinical samples; QZ and HKW conducted the analyses; all authors wrote and approved the manuscript.

## References

1. Heitzer E, Haque IS, Roberts CES, Speicher MR: **Current and future perspectives of liquid biopsies in genomics-driven oncology.** *Nature Reviews Genetics* 2019, **20**:71-88.
2. Wei ZY, Batagov AO, Schinelli S, Wang JT, Wang Y, El Fatimy R, Rabinovsky R, Balaj L, Chen CC, Hochberg F, et al: **Coding and noncoding landscape of extracellular RNA released by human glioma stem cells.** *Nature Communications* 2017, **8**:1-15.
3. Gruner HN, McManus MT: **Examining the evidence for extracellular RNA function in mammals.** *Nature Reviews Genetics* 2021, **22**:448-458.
4. Moufarrej MN, Vorperian SK, Wong RJ, Campos AA, Quintance CC, Sit RV, Tan M, Detweiler AM, Mekonen H, Neff NF, et al: **Early prediction of preeclampsia in pregnancy with cell-free RNA.** *Nature* 2022, **602**:689-694.
5. Rasmussen M, Reddy M, Nolan R, Camunas-Soler J, Khodursky A, Scheller NM, Cantonwine DE, Engelbrechtsen L, Mi JD, Dutta A, et al: **RNA profiles reveal signatures of future health and disease in pregnancy.** *Nature* 2022, **601**:422-427.
6. Ngo TTM, Moufarrej MN, Rasmussen MLH, Camunas-Soler J, Pan WY, Okamoto J, Neff NF, Liu KL, Wong RJ, Downes K, et al: **Noninvasive blood tests for fetal development predict gestational age and preterm delivery.** *Science* 2018, **360**:1133-1136.
7. Yu S, Li Y, Liao Z, Wang Z, Wang Z, Li Y, Qian L, Zhao J, Zong H, Kang B, et al: **Plasma extracellular vesicle long RNA profiling identifies a diagnostic signature for the detection of pancreatic ductal adenocarcinoma.** *Gut* 2020, **69**:540-550.
8. Li YC, Zhao JL, Yu SL, Wang Z, He XG, Su YH, Guo TAN, Sheng HY, Chen J, Zheng QP, et al: **Extracellular Vesicles Long RNA Sequencing Reveals Abundant mRNA, circRNA, and lncRNA in Human Blood as Potential Biomarkers for Cancer Diagnosis.** *Clinical Chemistry* 2019, **65**:798-808.
9. Ji J, Chen R, Zhao L, Xu YL, Cao Z, Xu H, Chen X, Shi XL, Zhu YS, Lyu J, et al: **Circulating exosomal mRNA profiling identifies novel signatures for the detection of prostate cancer.** *Molecular Cancer* 2021, **20**:58.
10. Larson MH, Pan WY, Kim HJ, Mauntz RE, Stuart SM, Pimentel M, Zhou YQ, Knudsgaard P, Demas V, Aravanis AM, Jamshidi A: **A comprehensive characterization of the cell-free transcriptome reveals tissue- and subtype-specific biomarkers for cancer detection.** *Nature Communications* 2021, **12**:1-11.
11. Cabus L, Lagarde J, Curado J, Lizano E, Perez-Boza J: **Current challenges and best practices for cell-free long RNA biomarker discovery.** *Biomarker Research* 2022, **10**:62.
12. Giraldez MD, Spengler RM, Etheridge A, Goicochea AJ, Tuck M, Choi SW, Galas DJ, Tewari M: **Phospho-RNA-seq: a modified small RNA-seq method that reveals circulating mRNA and lncRNA fragments as potential biomarkers in human plasma.** *EMBO J* 2019, **38**:e101695.
13. Akat KM, Lee YA, Hurley A, Morozov P, Max KE, Brown M, Bogardus K, Sopeyin A, Hildner K, Diacovo TG, et al: **Detection of circulating extracellular mRNAs by modified small-RNA-**

730 sequencing analysis. *JCI Insight* 2019, **5**:e127317.

731 14. Zhou Z, Wu Q, Yan Z, Zheng H, Chen CJ, Liu Y, Qi Z, Calandrelli R, Chen Z, Chien S, et al:

732 **Extracellular RNA in a single droplet of human serum reflects physiologic and disease**

733 **states.** *Proc Natl Acad Sci U S A* 2019, **116**:19200-19208.

734 15. Verwilt J, Trypsteen W, Van Paemel R, De Preter K, Giraldez MD, Mestdagh P, Vandesompele

735 J: **When DNA gets in the way: A cautionary note for DNA contamination in extracellular**

736 **RNA-seq studies.** *Proc Natl Acad Sci U S A* 2020, **117**:18934-18936.

737 16. Stark R, Grzelak M, Hadfield J: **RNA sequencing: the teenage years.** *Nature Reviews Genetics*

738 2019, **20**:631-656.

739 17. Farmer AA, Betts C, Bolduc N: **Methods of depleting a target molecule from an initial**

740 **collection of nucleic acids, and compositions and kits for practicing the same.** 2018.

741 18. Gu W, Crawford ED, O'Donovan BD, Wilson MR, Chow ED, Retallack H, DeRisi JL: **Depletion**

742 **of Abundant Sequences by Hybridization (DASH): using Cas9 to remove unwanted high-**

743 **abundance species in sequencing libraries and molecular counting applications.** *Genome*

744 *Biol* 2016, **17**:1-13.

745 19. Chen S, Jin Y, Wang S, Xing S, Wu Y, Tao Y, Ma Y, Zuo S, Liu X, Hu Y, et al: **Cancer type**

746 **classification using plasma cell-free RNAs derived from human and microbes.** *Elife* 2022,

747 **11**:e75181.

748 20. Moller A, Lobb RJ: **The evolving translational potential of small extracellular vesicles in**

749 **cancer.** *Nat Rev Cancer* 2020, **20**:697-709.

750 21. Arroyo JD, Chevillet JR, Kroh EM, Ruf IK, Pritchard CC, Gibson DF, Mitchell PS, Bennett CF,

751 Pogosova-Agadjanyan EL, Stirewalt DL, et al: **Argonaute2 complexes carry a population of**

752 **circulating microRNAs independent of vesicles in human plasma.** *Proc Natl Acad Sci U S*

753 *A* 2011, **108**:5003-5008.

754 22. Pan WY, Ngo TTM, Camunas-Soler J, Song CX, Kowarsky M, Blumenfeld YJ, Wong RJ, Shaw

755 GM, Stevenson DK, Quake SR: **Simultaneously Monitoring Immune Response and**

756 **Microbial Infections during Pregnancy through Plasma cfRNA Sequencing.** *Clinical*

757 *Chemistry* 2017, **63**:1695-1704.

758 23. Vorperian SK, Moufarrej MN, Tabula Sapiens C, Quake SR: **Cell types of origin of the cell-**

759 **free transcriptome.** *Nat Biotechnol* 2022, **40**:855-861.

760 24. Reggiardo RE, Maroli SV, Peddu V, Davidson AE, Hill A, LaMontagne E, Aaraj YA, Jain M, Chan

761 SY, Kim DH: **Profiling of repetitive RNA sequences in the blood plasma of patients with**

762 **cancer.** *Nat Biomed Eng* 2023.

763 25. Lee MN, Roy M, Ong SE, Mertins P, Villani AC, Li WB, Dotiwala F, Sen J, Doench JG, Orzalli MH,

764 et al: **Identification of regulators of the innate immune response to cytosolic DNA and**

765 **retroviral infection by an integrative approach.** *Nature Immunology* 2013, **14**:179-185.

766 26. Liu YH, Qu LL, Liu YY, Roizman B, Zhou GG: **PUM1 is a biphasic negative regulator of innate**

767 **immunity genes by suppressing LGP2.** *Proceedings of the National Academy of Sciences of*

768 *the United States of America* 2017, **114**:6902-6911.

769 27. Ansa-Addo EA, Huang HC, Riesenberger B, Iamaswat S, Borucki D, Nelson MH, Nam JH, Chung

770 D, Paulos CM, Liu B, et al: **RNA binding protein PCBP1 is an intracellular immune**

771 **checkpoint for shaping T cell responses in cancer immunity.** *Science Advances* 2020,  
772 6:3865.

773 28. Coker OO, Wu WKK, Wong SH, Sung JJY, Yu J: **Altered Gut Archaea Composition and**  
774 **Interaction With Bacteria Are Associated With Colorectal Cancer.** *Gastroenterology* 2020,  
775 159:1459-1470.

776 29. Moens U, Calvignac-Spencer S, Lauber C, Ramgvist T, Feltkamp MCW, Daugherty MD,  
777 Verschoor EJ, Ehlers B, Consortium IR: **ICTV Virus Taxonomy Profile: Polyomaviridae.**  
778 *Journal of General Virology* 2017, 98:1159-1160.

779 30. Verboom K, Everaert C, Bolduc N, Livak KJ, Yigit N, Rombaut D, Anckaert J, Lee S, Venio MT,  
780 Kjemis J, et al: **SMARTer single cell total RNA sequencing.** *Nucleic Acids Research* 2019,  
781 47:e93.

782 31. Wu J, Huang B, Chen H, Yin Q, Liu Y, Xiang Y, Zhang B, Liu B, Wang Q, Xia W, et al: **The**  
783 **landscape of accessible chromatin in mammalian preimplantation embryos.** *Nature* 2016,  
784 534:652-657.

785 32. Hardigan AA, Roberts BS, Moore DE, Ramaker RC, Jones AL, Myers RM: **CRISPR/Cas9-**  
786 **targeted removal of unwanted sequences from small-RNA sequencing libraries.** *Nucleic*  
787 *Acids Res* 2019, 47:e84.

788 33. Prezza G, Heckel T, Dietrich S, Homberger C, Westermann AJ, Vogel J: **Improved bacterial**  
789 **RNA-seq by Cas9-based depletion of ribosomal RNA reads.** *RNA* 2020, 26:1069-1078.

790 34. Wilkins OG, Ule J: **Ribocutter: Cas9-mediated rRNA depletion from multiplexed Ribo-seq**  
791 **libraries.** *bioRxiv* 2021:2021.2007.2014.451473.

792 35. Loi DSC, Yu L, Wu AR: **Effective ribosomal RNA depletion for single-cell total RNA-seq by**  
793 **scDASH.** *PeerJ* 2021, 9:e10717.

794 36. Su YH, Li YC, Guo R, Zhao JJ, Chi WR, Lai HY, Wang J, Wang Z, Li L, Sang YT, et al: **Plasma**  
795 **extracellular vesicle long RNA profiles in the diagnosis and prediction of treatment**  
796 **response for breast cancer.** *Npj Breast Cancer* 2021, 7:1-10.

797 37. Toden S, Zhuang JL, Acosta AD, Karns AP, Salathia NS, Brewer JB, Wilcock DM, Aballi J,  
798 Nerenberg M, Quake SR, Ibarra A: **Noninvasive characterization of Alzheimer's disease by**  
799 **circulating, cell-free messenger RNA next-generation sequencing.** *Science Advances*  
800 2020, 6:1654.

801 38. He YD, Tao W, He T, Wang BY, Tang XM, Zhang LM, Wu ZQ, Deng WM, Zhang LX, Shao CK,  
802 et al: **A urine extracellular vesicle circRNA classifier for detection of high-grade prostate**  
803 **cancer in patients with prostate-specific antigen 2-10 ng/mL at initial biopsy.** *Molecular*  
804 *Cancer* 2021, 20:1-6.

805 39. Nabat BY, Qiu Y, Shabason JE, Wu TJ, Yoon T, Kim BC, Benci JL, DeMichele AM, Tchou J,  
806 Marcotrigiano J, Minn AJ: **Exosome RNA Unshielding Couples Stromal Activation to**  
807 **Pattern Recognition Receptor Signaling in Cancer.** *Cell* 2017, 170:352-366.

808 40. Salmen F, De Jonghe J, Kaminski TS, Alemany A, Parada GE, Verity-Legg J, Yanagida A, Kohler  
809 TN, Battich N, van den Brekel F, et al: **High-throughput total RNA sequencing in single**  
810 **cells using VASA-seq.** *Nature Biotechnology* 2022.

811 41. Isakova A, Neff N, Quake SR: **Single-cell quantification of a broad RNA spectrum reveals**

812        **unique noncoding patterns associated with cell types and states.** *Proceedings of the*  
813        *National Academy of Sciences of the United States of America* 2021, **118**.

814        42. Enderle D, Spiel A, Coticchia CM, Berghoff E, Mueller R, Schlumpberger M, Sprenger-Haussels  
815        M, Shaffer JM, Lader E, Skog J, Noerholm M: **Characterization of RNA from Exosomes and**  
816        **Other Extracellular Vesicles Isolated by a Novel Spin Column-Based Method.** *Plos One*  
817        2015, **10**:e0136133.

818        43. Buschmann T: **DNABarcodes: an R package for the systematic construction of DNA**  
819        **sample tags.** *Bioinformatics* 2017, **33**:920-922.

820        44. Bagnoli JW, Ziegenhain C, Janjic A, Wange LE, Vieth B, Parekh S, Geuder J, Hellmann I, Enard  
821        W: **Sensitive and powerful single-cell RNA sequencing using mcSCRB-seq.** *Nature*  
822        *Communications* 2018, **9**.

823        45. Dynerman D, Lyden A, Quan J, Caldera S, McGeever A, Dimitrov B, King R, Cirolia G, Tan M,  
824        Sit R, et al: **Designing and implementing programmable depletion in sequencing libraries**  
825        **with DASHit.** *bioRxiv* 2020:2020.2001.2012.891176.

826        46. Smith T, Heger A, Sudbery I: **UMI-tools: modeling sequencing errors in Unique Molecular**  
827        **Identifiers to improve quantification accuracy.** *Genome Research* 2017, **27**:491-499.

828        47. Dobin A, Davis CA, Schlesinger F, Drenkow J, Zaleski C, Jha S, Batut P, Chaisson M, Gingeras  
829        TR: **STAR: ultrafast universal RNA-seq aligner.** *Bioinformatics* 2013, **29**:15-21.

830        48. Liao Y, Smyth GK, Shi W: **featureCounts: an efficient general purpose program for**  
831        **assigning sequence reads to genomic features.** *Bioinformatics* 2014, **30**:923-930.

832        49. Wood DE, Lu J, Langmead B: **Improved metagenomic analysis with Kraken 2.** *Genome Biol*  
833        2019, **20**:1-13.

834        50. Robinson MD, McCarthy DJ, Smyth GK: **edgeR: a Bioconductor package for differential**  
835        **expression analysis of digital gene expression data.** *Bioinformatics* 2010, **26**:139-140.

836        51. Yu GC, Wang LG, Han YY, He QY: **clusterProfiler: an R Package for Comparing Biological**  
837        **Themes Among Gene Clusters.** *Omics-a Journal of Integrative Biology* 2012, **16**:284-287.

838        52. Bailey TL, Grant CE: **SEA: Simple Enrichment Analysis of motifs.** *bioRxiv*  
839        2021:2021.2008.2023.457422.

840        53. Zhao WH, Zhang S, Zhu YM, Xi XC, Bao PF, Ma ZY, Kapral TH, Chen SY, Zagrovic B, Yang YCT,  
841        Lu ZJ: **POSTAR3: an updated platform for exploring post-transcriptional regulation**  
842        **coordinated by RNA-binding proteins.** *Nucleic Acids Research* 2022, **50**:D287-D294.

843        54. Crooks GE, Hon G, Chandonia JM, Brenner SE: **WebLogo: A sequence logo generator.**  
844        *Genome Research* 2004, **14**:1188-1190.

845        55. Robin X, Turck N, Hainard A, Tiberti N, Lisacek F, Sanchez JC, Muller M: **pROC: an open-**  
846        **source package for R and S plus to analyze and compare ROC curves.** *Bmc Bioinformatics*  
847        2011, **12**:1-8.

## Figure Legends

### Figure 1 | Depletion-assisted multiplexed cell-free total RNA sequencing.

(A) Bioanalyzer trace of cfRNA fragment lengths in a human plasma sample. (B) The relative proportion of reads for various RNA biotypes detected by total RNA sequencing averaged by three human plasma samples. (C) Distribution of reads' insert size for the fragmented rRNAs and mtRNAs, derived from the above sequencing data. (D) Distribution of reads' coverage. Blue bars on top represent sgRNA target sites. (E) The designed sgRNAs tiling the fragmented rRNA and mtRNA sequences. (F) Schematic overview of DETECTOR-seq workflow. First, cfRNAs are reverse transcribed with random primers and TSO. Sample barcodes and UMIs are introduced during this step. Second, after calibrating input amounts, samples are pooled and pre-amplified. Third, cDNAs of rRNAs and mtRNAs are depleted by CRISPR-Cas9. Subsequently, DETECTOR-seq library is further amplified, then sequenced on an Illumina platform. rRNA: ribosomal RNA; mtRNA: mitochondrial RNA; TSO: template switching oligo; UMI: unique molecular identifier.

### Figure 2 | Efficient and specific depletion of rRNA and mtRNA sequences.

(A) The read distributions and (B) coverages of untreated and rRNA/mtRNA-depleted DETECTOR-seq libraries. Read coverage was normalized to total mapped reads. Pearson correlation of cfRNA expression levels between (C) untreated and rRNA/mtRNA-depleted DETECTOR-seq libraries, and (D) DETECTOR-seq versus SMARTer-seq. TPM: transcripts



per million mapped reads (rRNA/mtRNA reads were removed).

### **Figure 3 | Comparing DETECTOR-seq with other cfRNA-seq methods.**

**(A)** Average percentages of genome-aligned reads mapping to exonic, intronic, and intergenic regions for four different cfRNA-seq methods. **(B)** Average coverage across all mRNAs' 5' and 3' exon boundary sites flanking upstream and downstream by 50 bp. **(C)** Average percentages of reads located in the sense and antisense strands of mRNAs' exons, introns, and promoters. **(D)** Average percentages of clean reads (after trimming low-quality and adapter sequences) assigned to different sources. **(E)** Numbers of raw sequencing reads and human genome-aligned reads with a fixed budget of \$300 for each method. **(F)** Summary of key techniques used in the four cfRNA-seq approaches. Numbers of used samples: Phospho-seq: 15; SILVER-seq: 128; SMARTer-seq: 373; DETECTOR-seq: 113.

### **Figure 4 | Distinct human and microbial RNA signatures in *Plasma* versus *EV*.**

**(A)** Illustration of sequencing *Plasma* cfRNAs and *EV* cfRNAs in paired plasma samples. **(B)** Plasma extracellular vesicles were characterized by nanoparticle tracking analysis and transmission electron microscopy (scale bar represents 200 nm). **(C)** Distribution of reads mapped to human genome and microbiome in *Plasma* and *EV* cfRNA datasets. Left: RNA spectrum mapping to human genome; Right: relative abundance of reads aligned to different phyla. **(D)** Differential human RNA species between *Plasma* and *EV* cfRNAs. **(E)** Pie charts show the average fractional contributions of various cell types to the *Plasma* and *EV*



transcriptomes. Box plots show the diversity of cell type contributions to the *Plasma* and *EV* transcriptomes measured by the ratio of non-blood cells and Simpson's index. **(F)** Boxplots represent the enrichment of cfRNAs derived from transposable elements in *Plasma* cfRNAs compared to *EV* cfRNAs. The different transposable element categories, including short interspersed elements (SINEs), long interspersed elements (LINEs), long interspersed elements with long terminal repeats (LTR), and DNA transposons, are represented. **(G)** The fractions of reads aligned to microbe and virus. *Plasma*: 44 samples; *EV*: 44 samples (all samples paired). \*\*\*\*:  $P$ -value  $< 0.0001$ , \*\*:  $P$ -value  $< 0.01$ , \*:  $P$ -value  $< 0.05$ , Wilcoxon rank sum test, two-tailed.

## **Figure 5 | Distinct functional pathways, motifs, and binding proteins of the selective *Plasma* and *EV* cfRNAs.**

**(A)** Definition of the selective cfRNAs enriched in *Plasma* or *EV*. Cutoff:  $|\text{Fold-change}| > 1$  and  $\text{FDR} < 0.1$ . **(B)** Top enriched GO pathways of the selective cfRNAs. **(C)** Top enriched motifs and their corresponding RNA binding proteins (RBPs) of the selective cfRNAs. *Plasma*: 44 samples; *EV*: 44 samples (all samples paired).

## **Figure 6 | Cancer-relevant cfRNA signatures in *Plasma* and *EV*.**

**(A)** Cancer-relevant ones (differentially expressed between cancer patients and normal controls,  $|\log_2\text{fold-change}| > 1$  and  $\text{FDR} < 0.05$ ) in the selective and non-selective human cfRNAs. Cancer: colorectal cancer (CRC) and lung cancer (LC); NC: normal control. **(B)** Enriched GO

913 terms related to cancer-relevant human cfRNAs. Performances (average of 20 bootstrap  
914 procedures) of cancer-relevant human cfRNAs distinguishing cancer patients from normal  
915 controls when excluding **(C)** and including **(D)** non-selective cfRNAs. **(E)** AUROCs of cancer  
916 type classification (CRC vs. LC) using human- or microbe-derived reads in *Plasma* and *EV*  
917 cfRNAs. **(F)** Numbers of microbial features (genus) with significantly differential abundance  
918 ( $|\log_2\text{fold-change}| > 1$  and  $\text{FDR} < 0.1$ ) between CRC and LC in 20 bootstrap procedures. **(G)**  
919 Distinct cancer type-specific microbial features (genus) identified in *Plasma* and *EV* cfRNAs.  
920 Heatmaps show z-scores of the abundance levels of these microbial RNA features; bar plots  
921 illustrate their average  $\log_2\text{FCs}$  and  $\text{FDRs}$  between CRC and LC. FC: fold-change; FDR: false  
922 discovery rate. \*\*\*\*:  $P\text{-value} < 0.0001$ , \*\*\*:  $P\text{-value} < 0.001$ , \*:  $P\text{-value} < 0.05$ , Wilcoxon rank  
923 sum test, two-tailed. CRC samples: *Plasma* (n=23), *EV* (n=19), 19 of them paired; LC samples:  
924 *Plasma* (n=19), *EV* (n=19), 18 of them paired; NC samples: *Plasma* (n=19), *EV* (n=14), 7 of  
925 them paired.

Figure 1

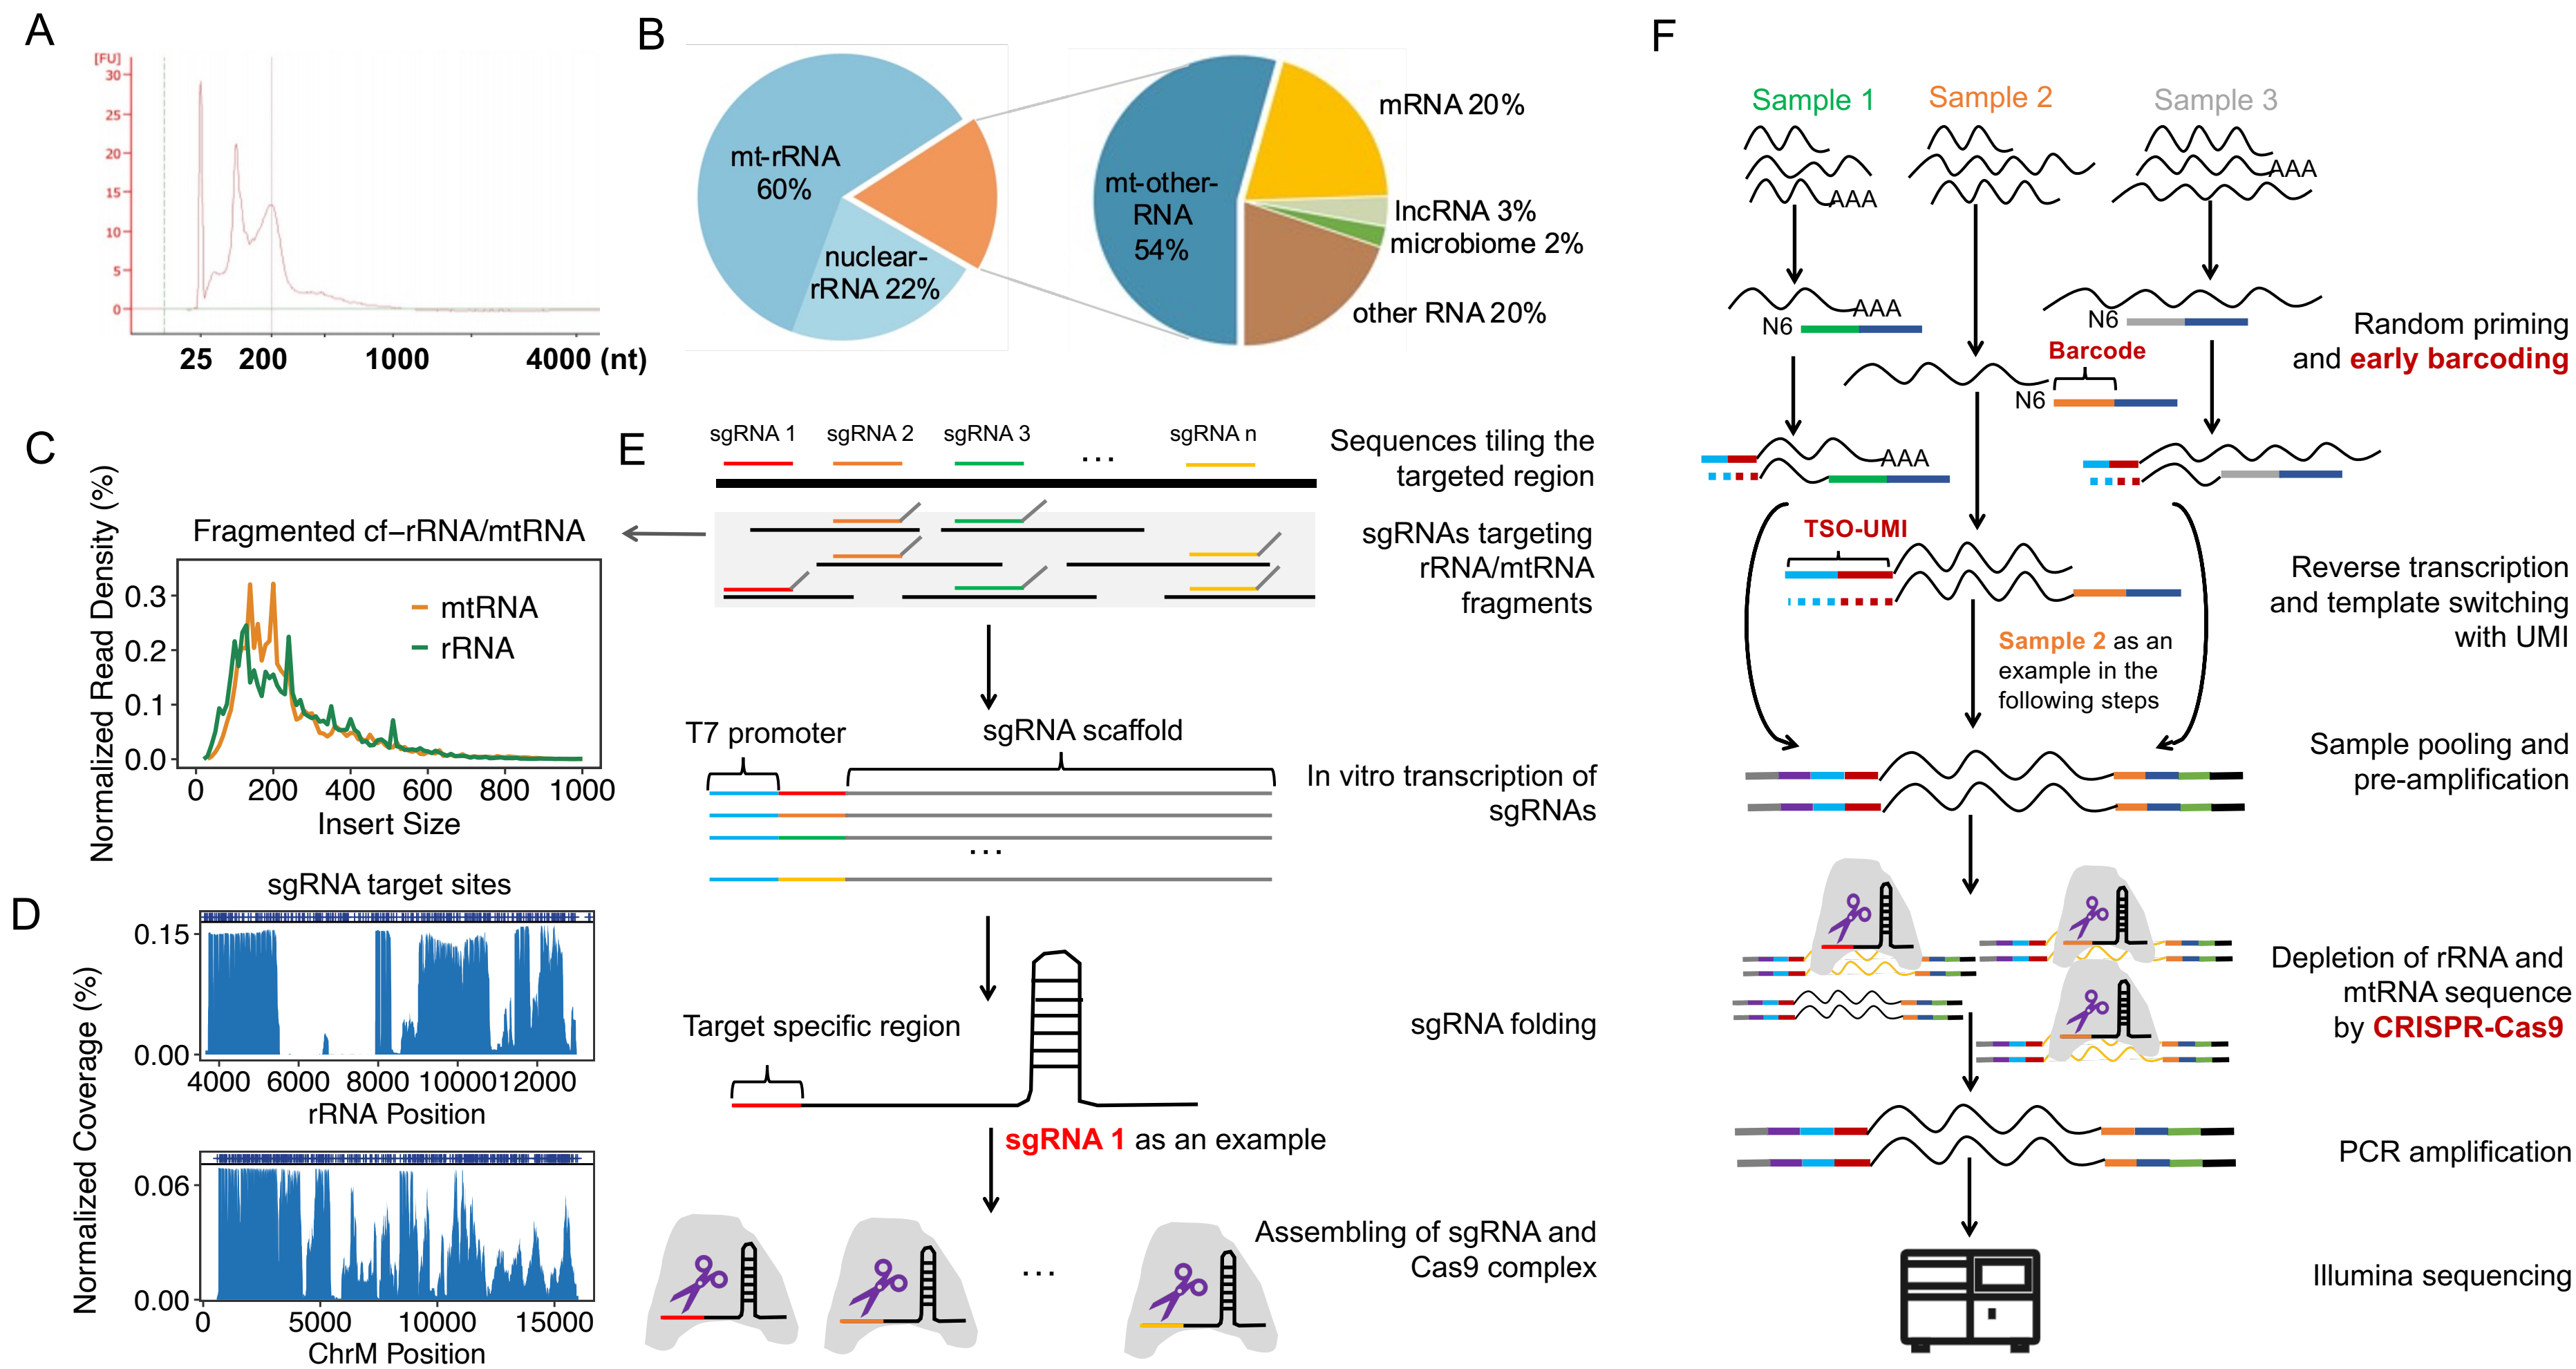

Figure 2

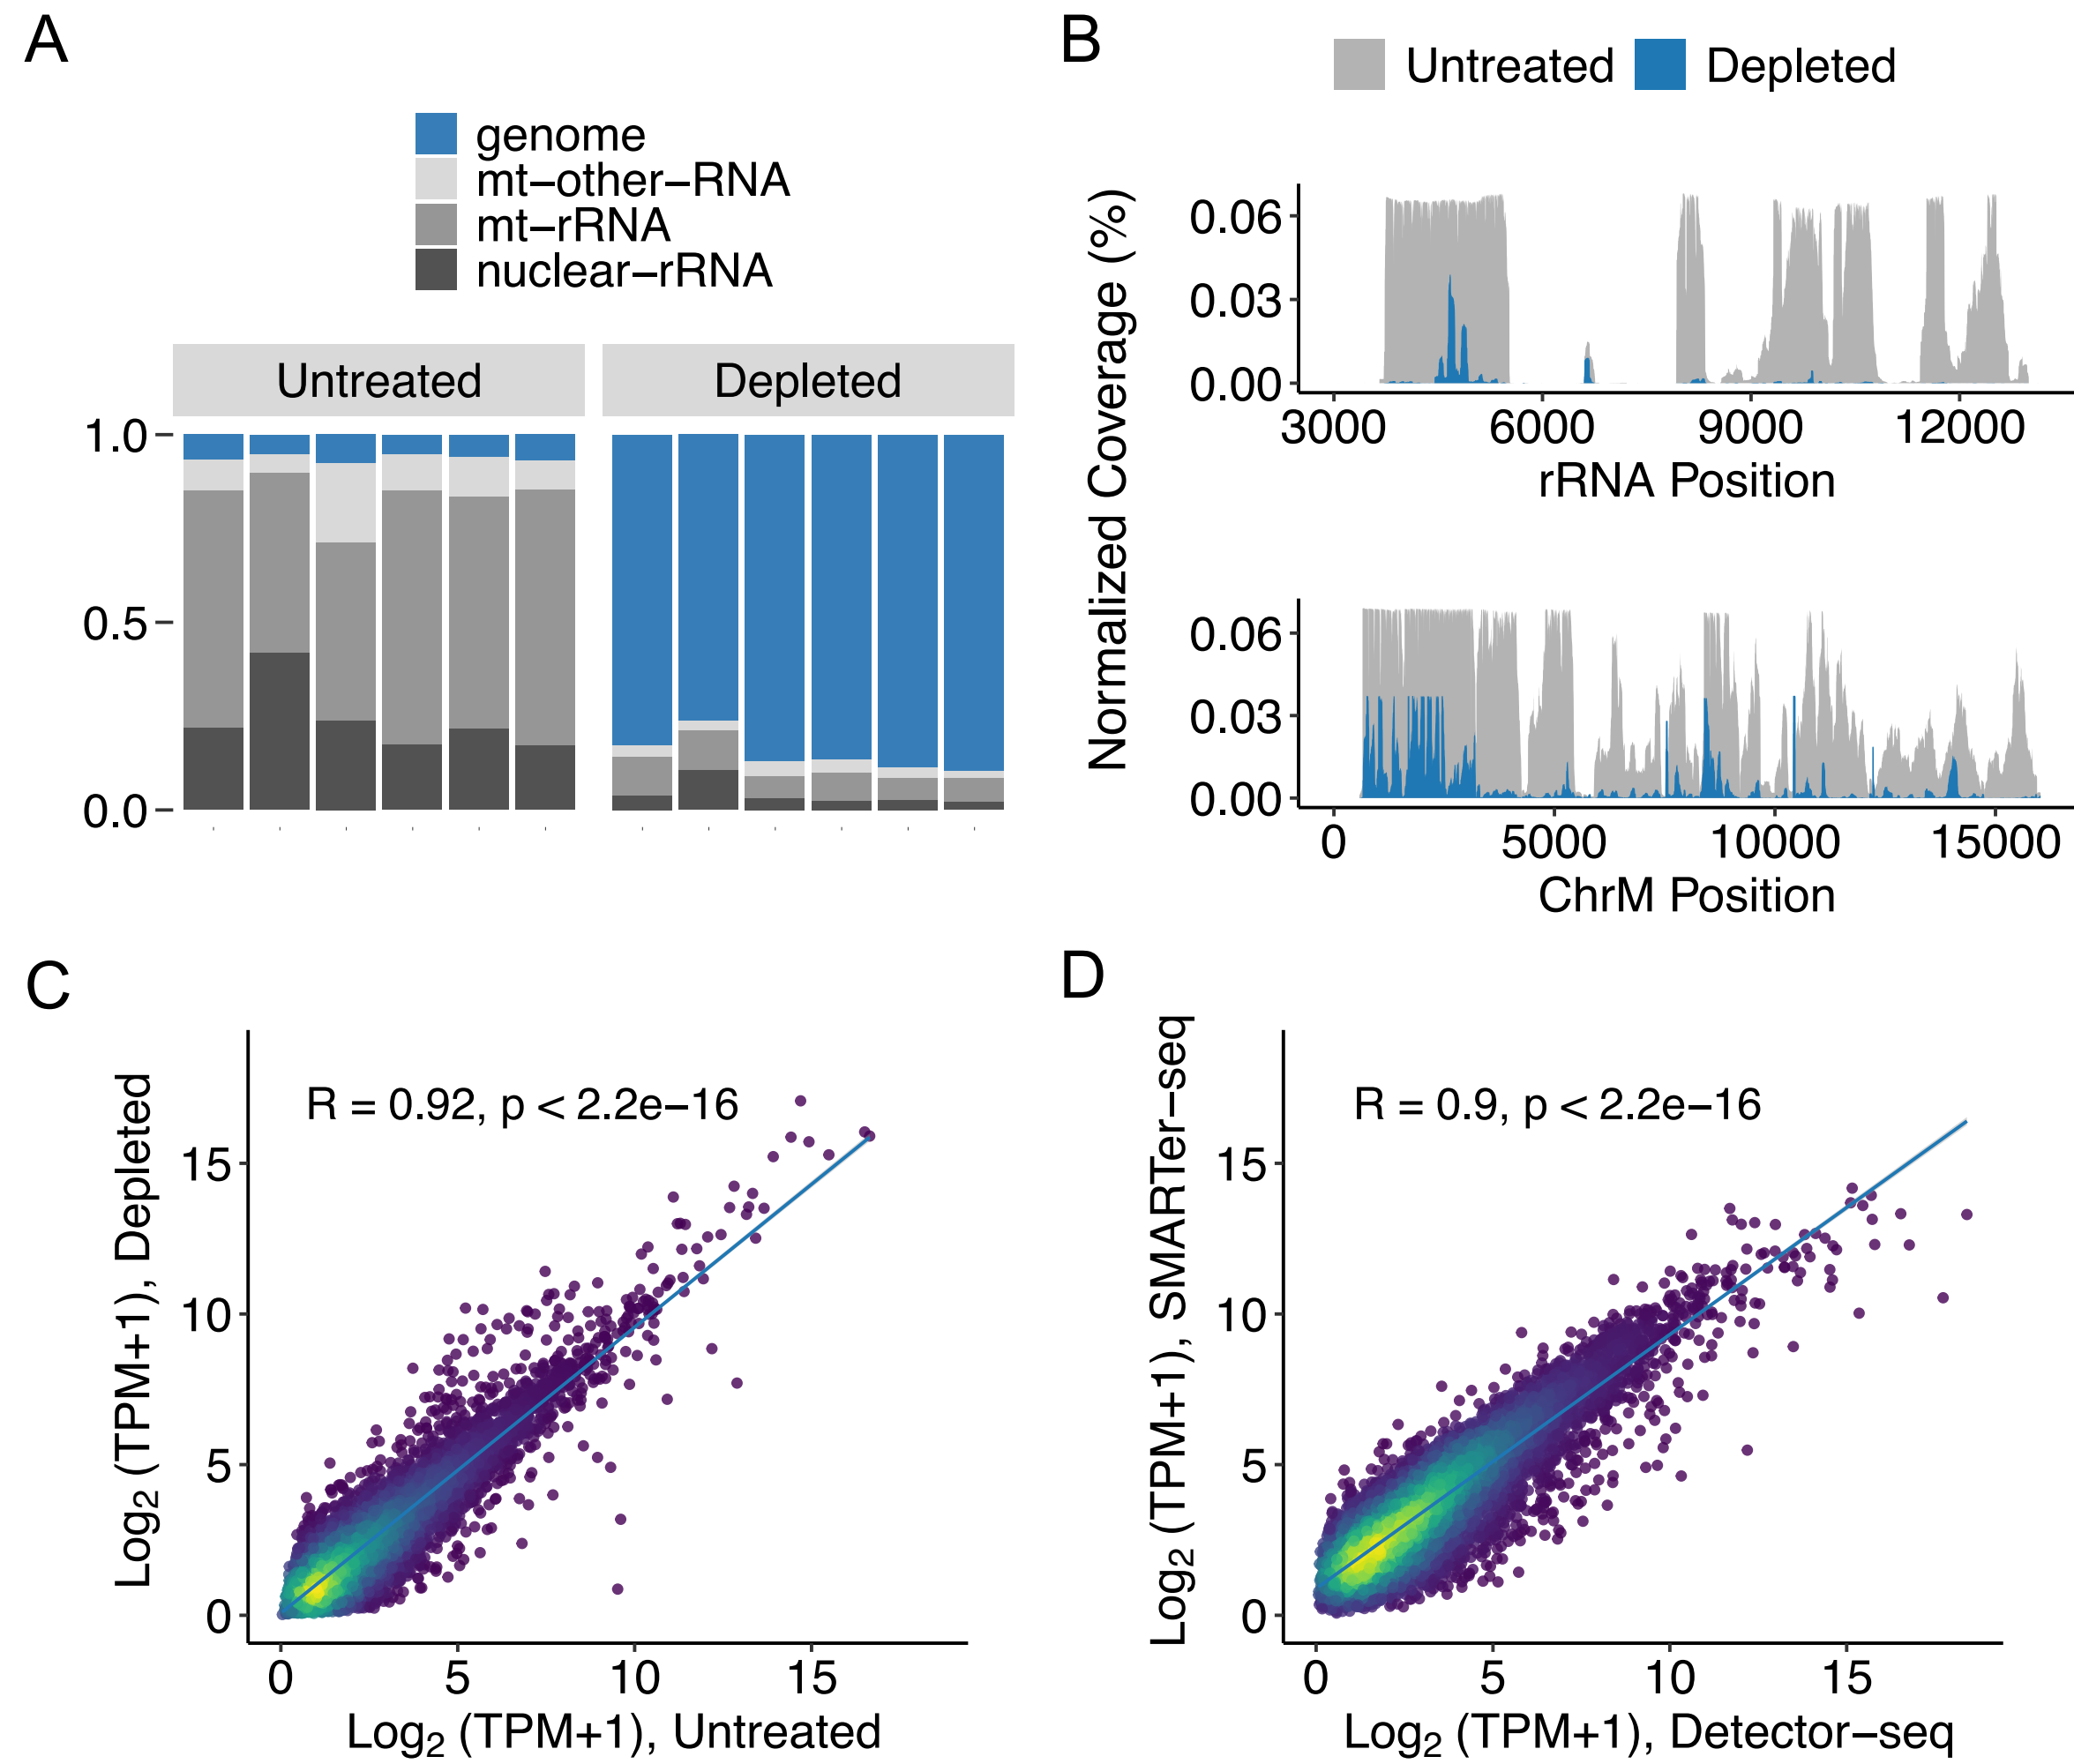

Figure 3

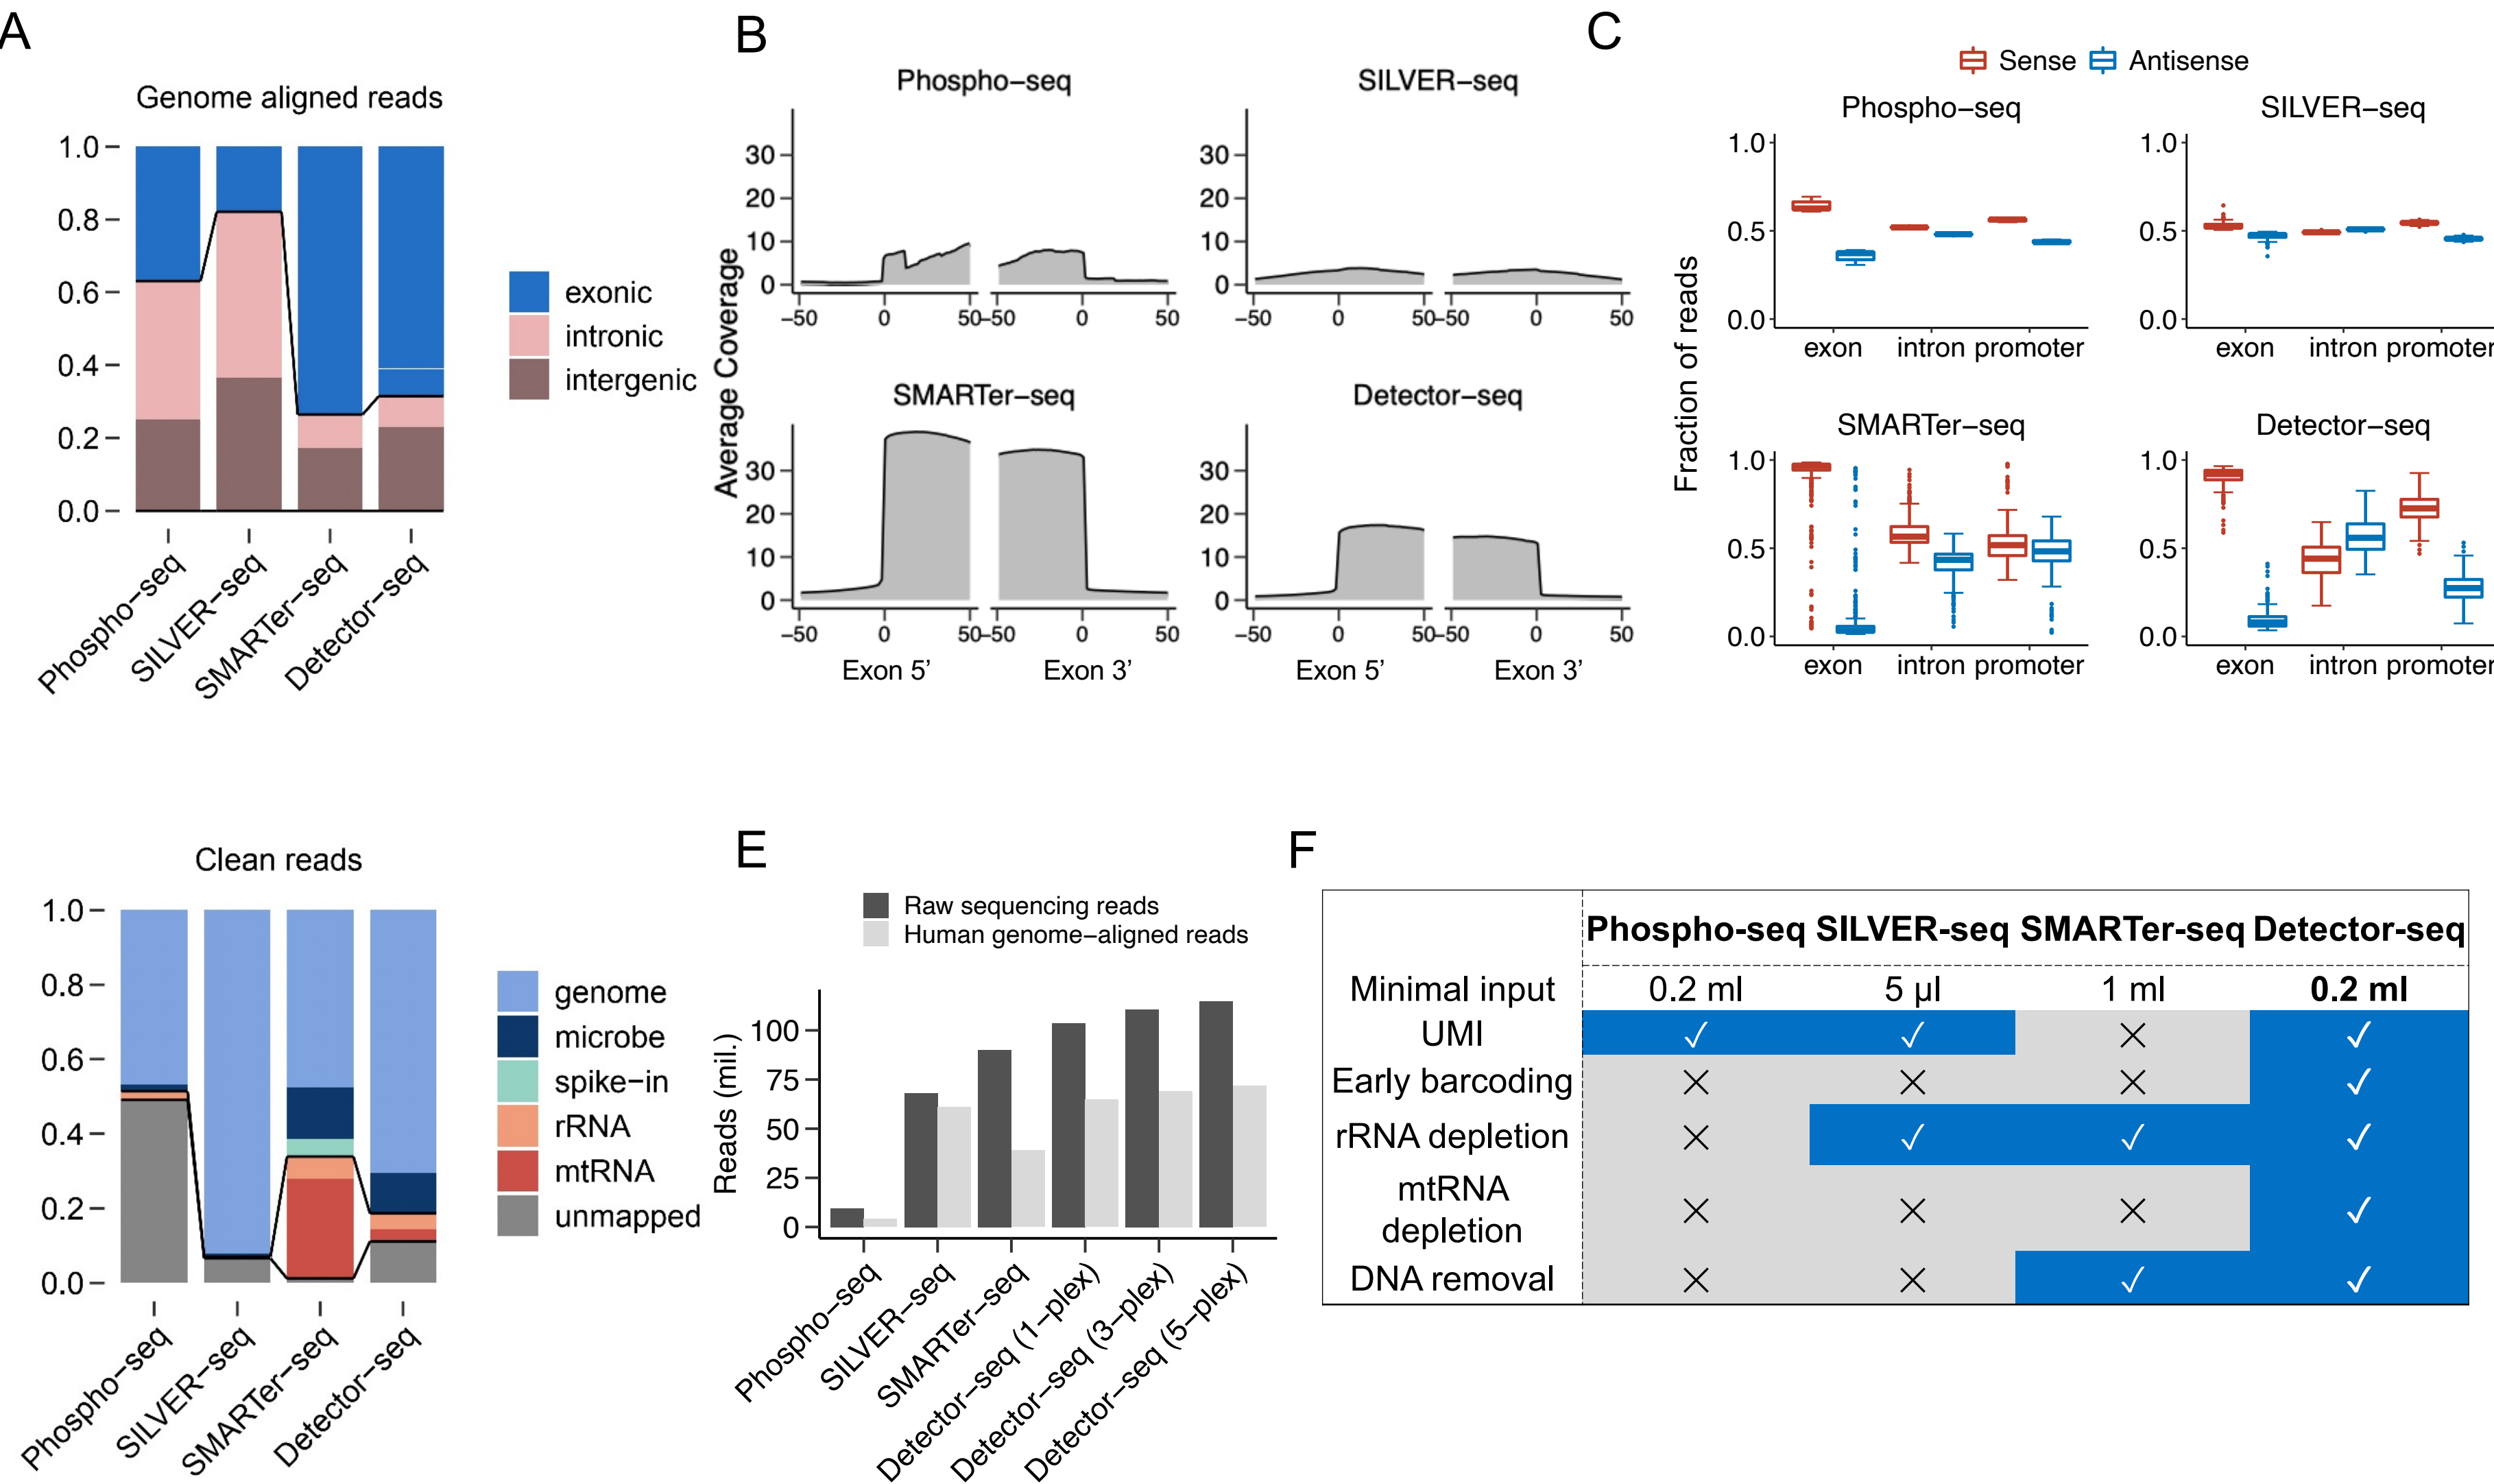



Figure 4

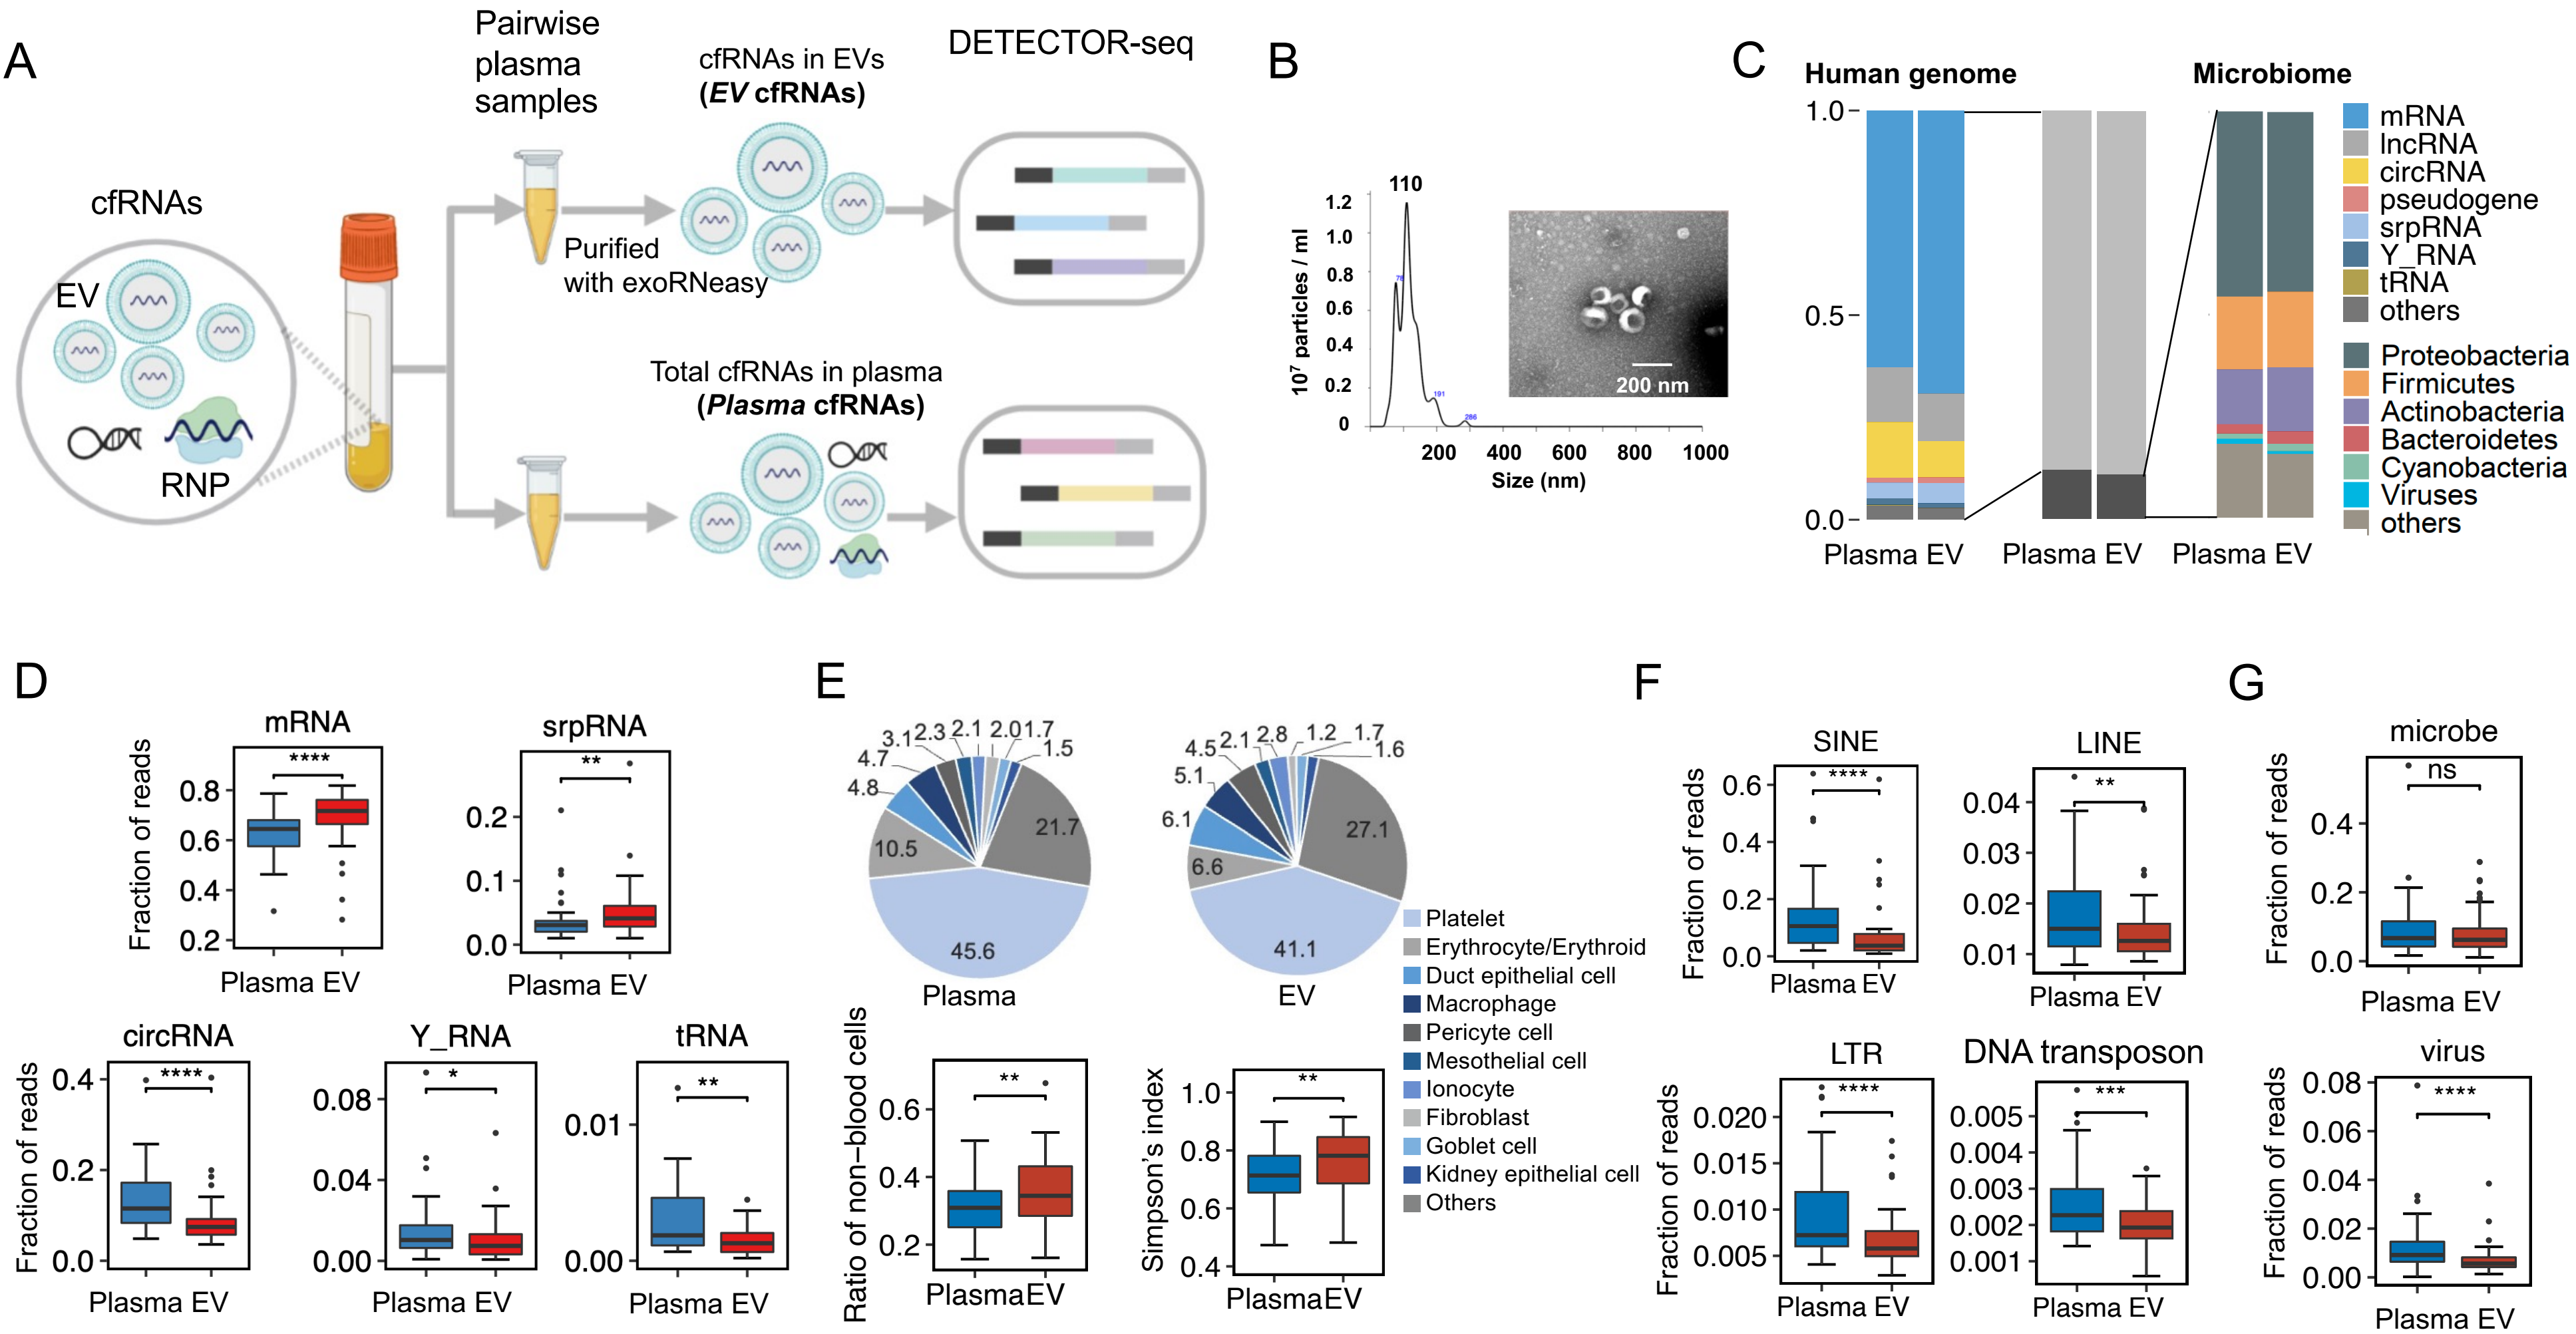

Figure 5

A

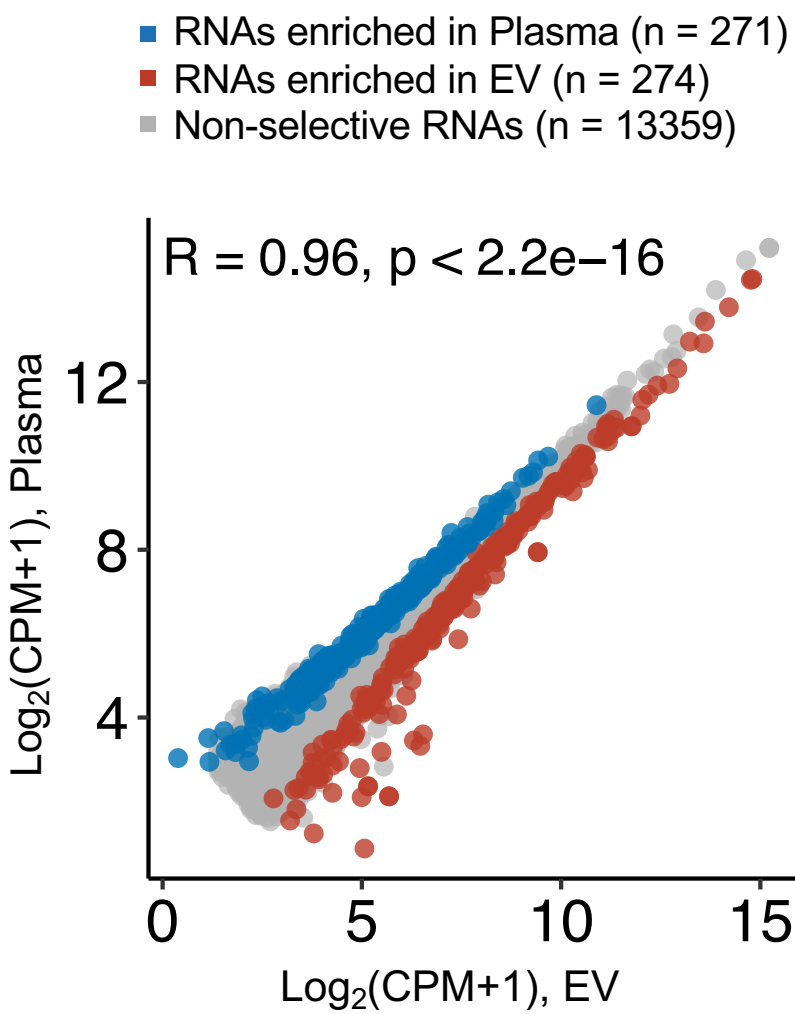

B

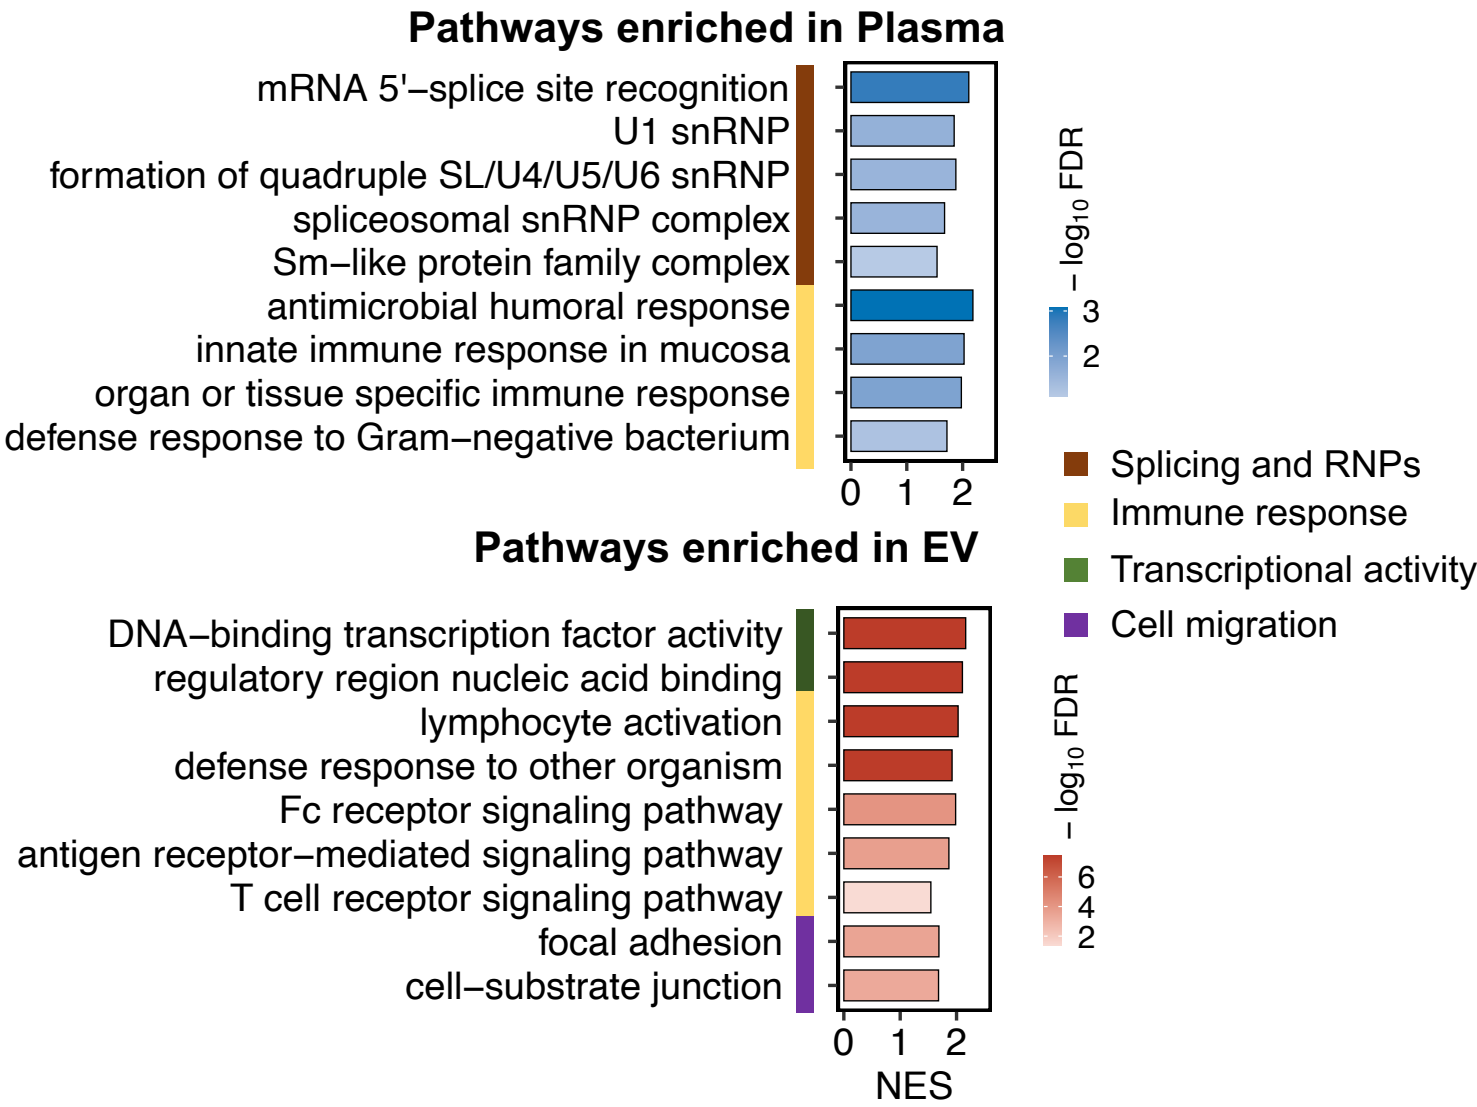

C

|                    | Motif | E-value  | RBP      | Annotation              |
|--------------------|-------|----------|----------|-------------------------|
| Enriched in Plasma |       | 1.64E-35 | ABCF1    | innate immune           |
|                    |       | 1.46E-29 | SFPQ     | splicing factor         |
|                    |       | 2.31E-26 | LARP4    | La RNP                  |
|                    |       | 4.51E-23 | TROVE2   | Y RNA binding protein   |
|                    |       | 1.77E-20 | DKC1     | snoRNP                  |
| Enriched in EV     |       | 2.57E-61 | PUM1     | innate immune           |
|                    |       | 4.7E-57  | BCLAF1   | transcription repressor |
|                    |       | 2.4E-55  | HNRNPU   | transcription regulator |
|                    |       | 9.47E-55 | PCBP1    | immune checkpoint       |
|                    |       | 1.12E-51 | APOBEC3C | RNA editing             |

Figure 6

A

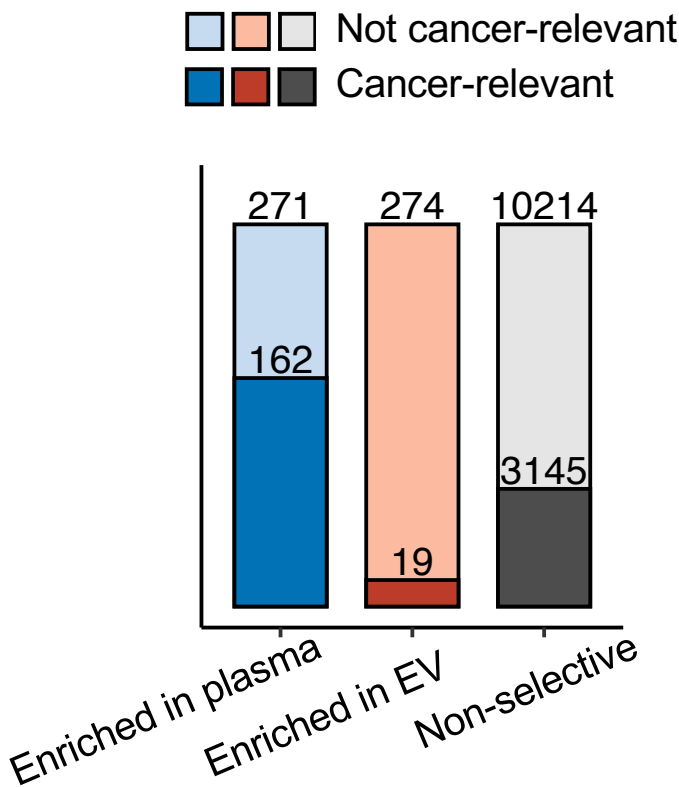

B

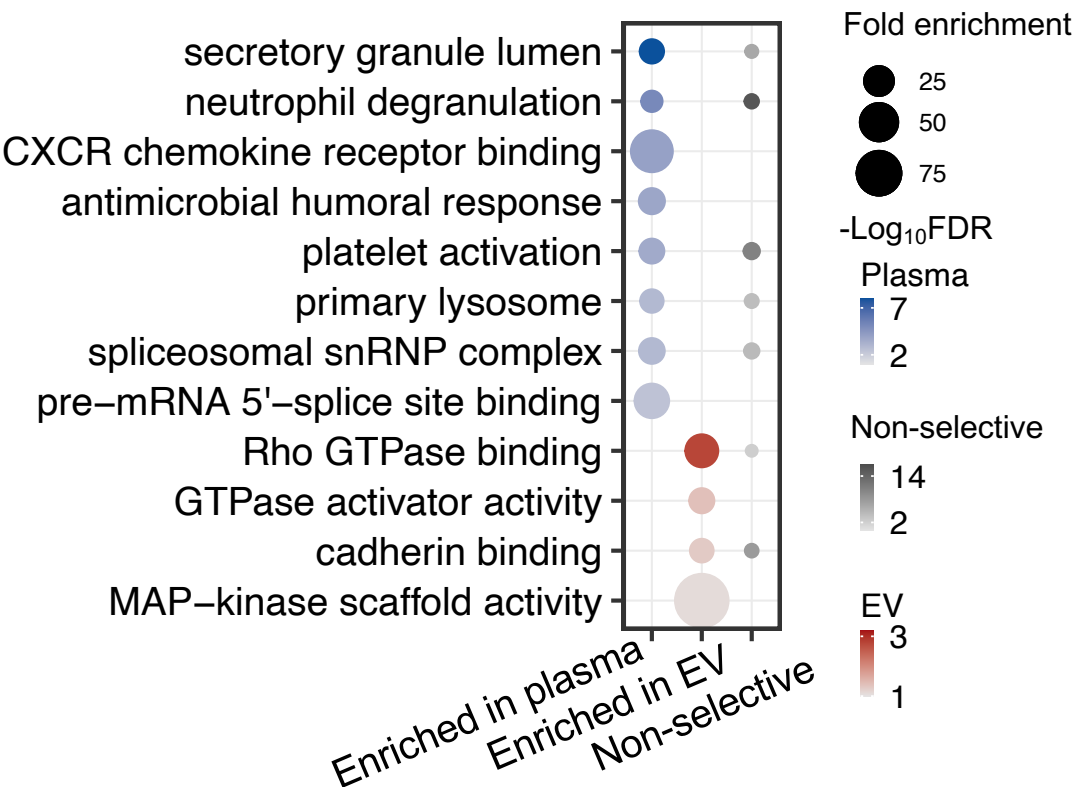

C

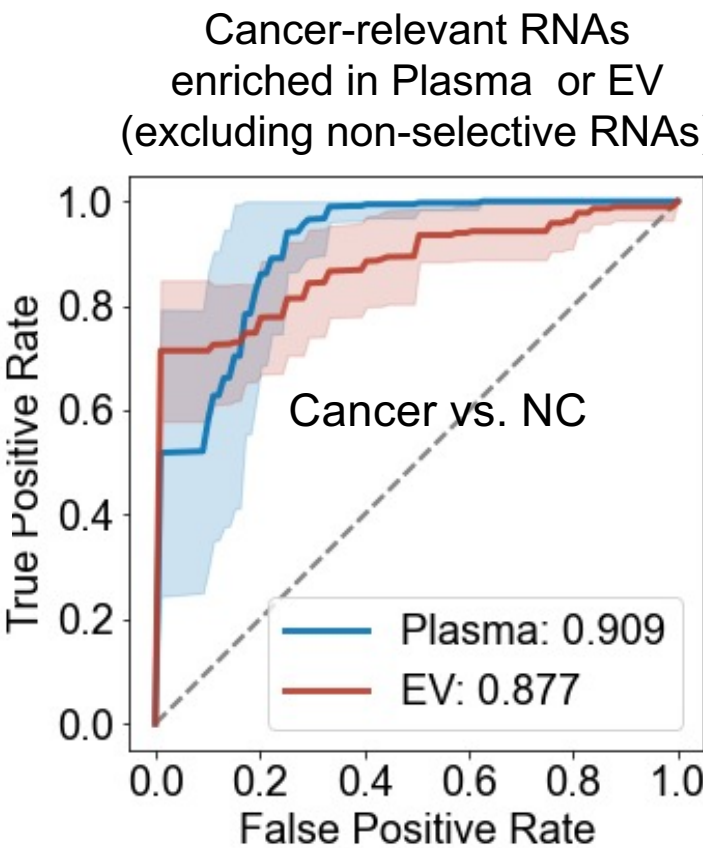

D

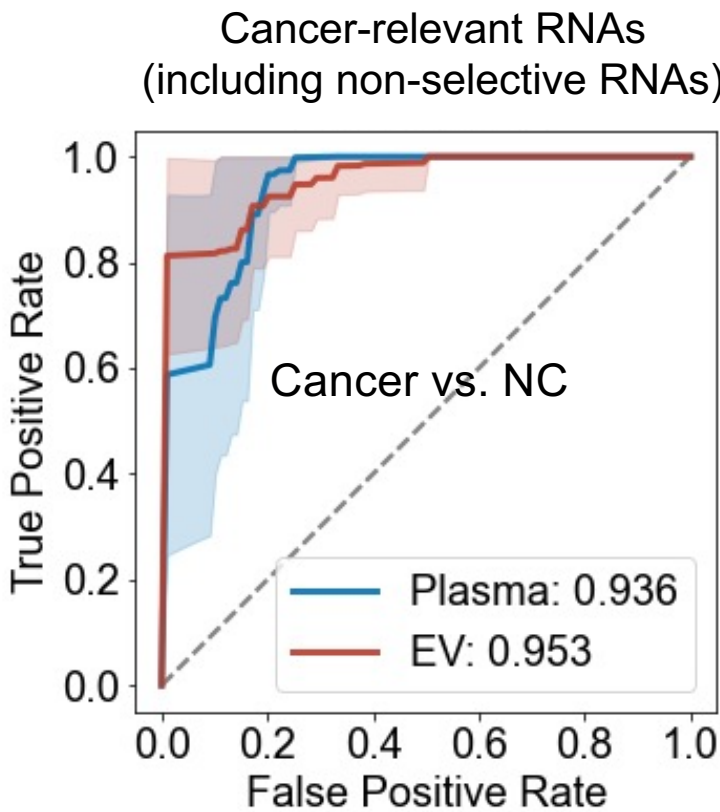

E

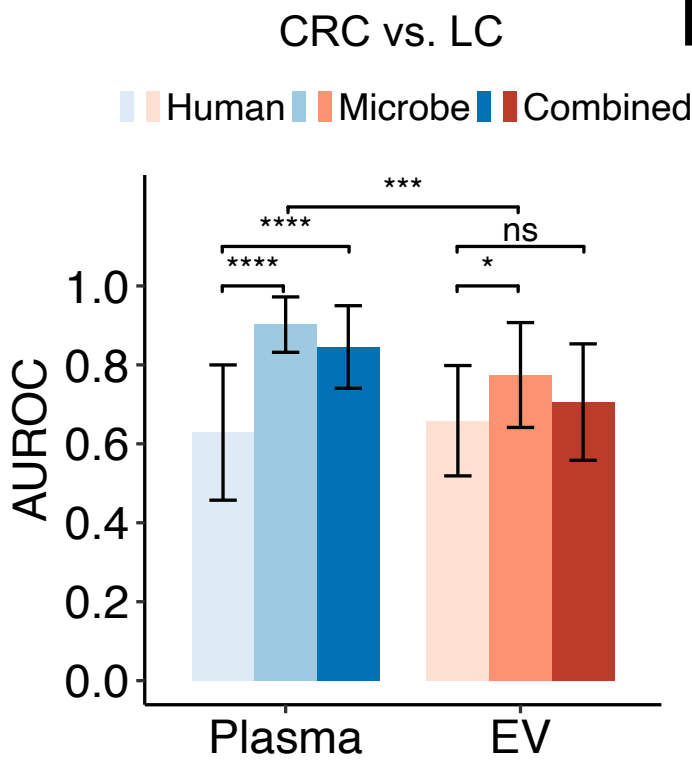

F

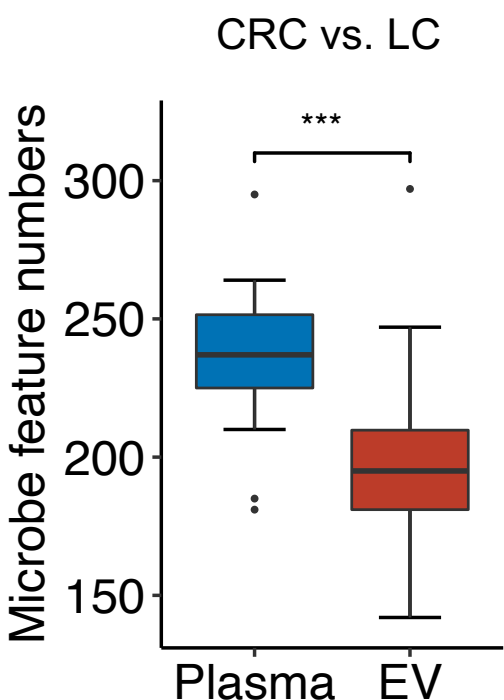

G

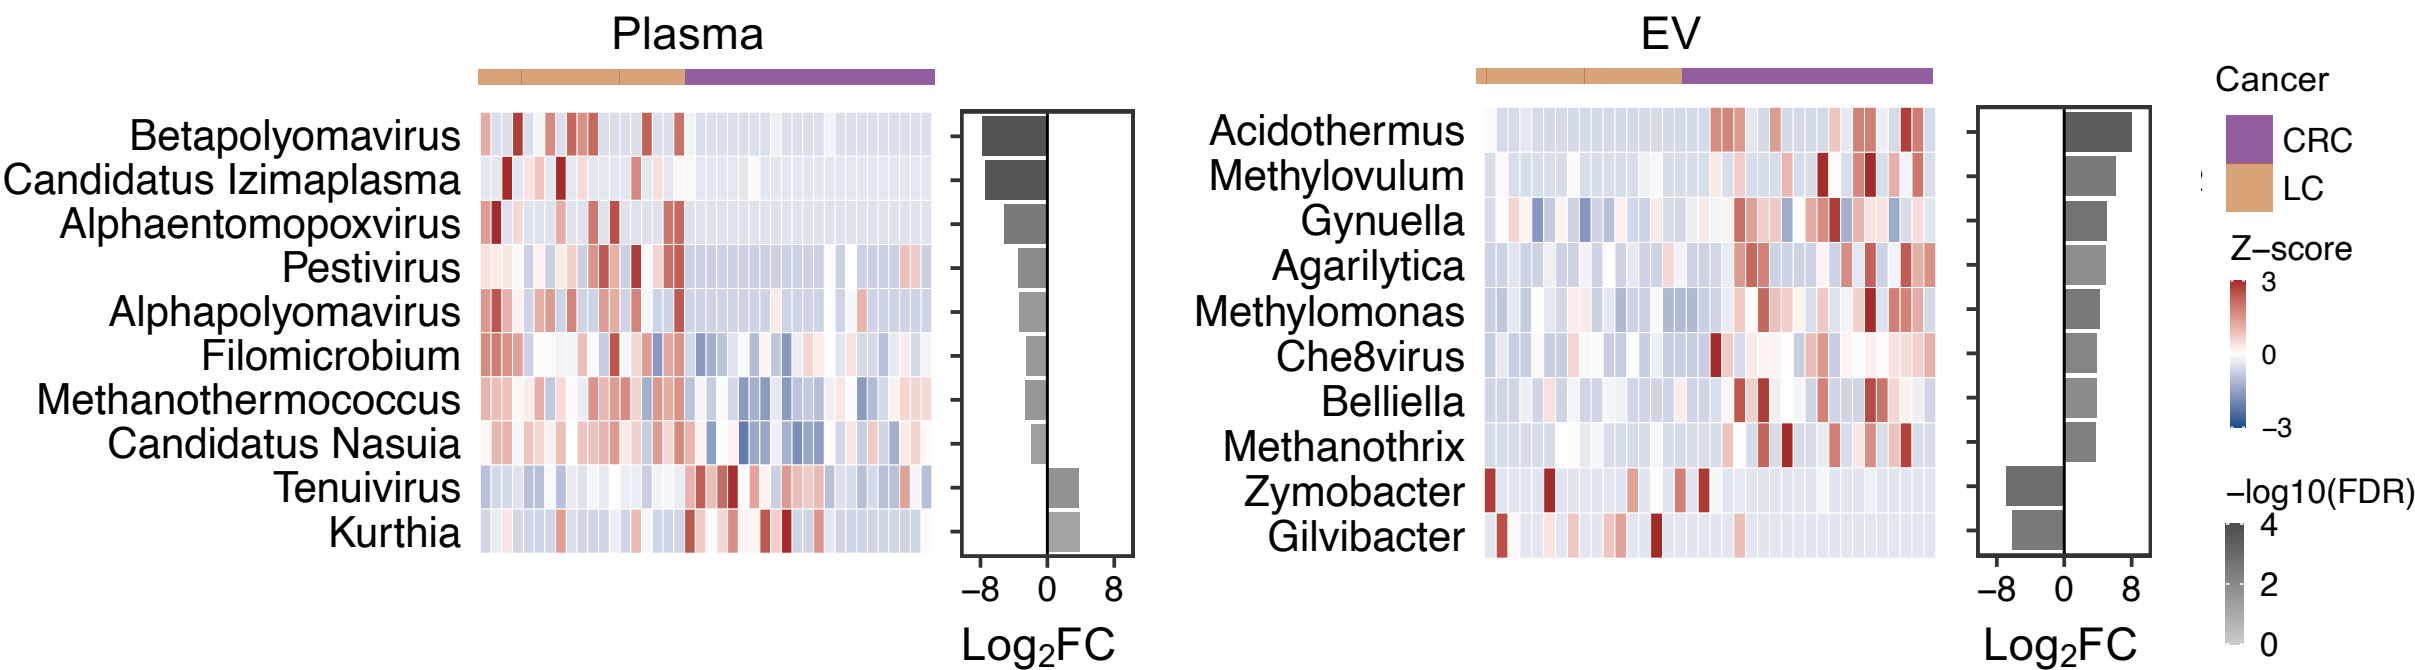



**Table 1. Practical reference for cfRNA-seq in human plasma**

|                                                                    | <i>Plasma</i> cfRNA         | <i>EV</i> cfRNA             |
|--------------------------------------------------------------------|-----------------------------|-----------------------------|
| <b>EV Purification</b>                                             | <b>No</b>                   | <b>Yes</b>                  |
| Cost of plasma volume, experimental time and reagents <sup>1</sup> | relatively less             | relatively more             |
| Enriched RNA species                                               | circRNA, tRNA, Y RNA        | mRNA, srpRNA                |
| Enriched microbes                                                  | viruses                     | intestinimonas, etc.        |
| Diversity of cell-types-of-origin                                  | relatively low              | relatively high             |
| TE RNAs <sup>2</sup>                                               | relatively more             | relatively less             |
| Cancer detection                                                   | good (AUC: 0.94)            | good (AUC: 0.95)            |
| Cancer type-specific microbes                                      | relatively more             | relatively less             |
| Cancer type classification                                         | relatively good (AUC: 0.90) | relatively poor (AUC: 0.77) |
| <sup>1</sup> Different cost is due to the EV purification step.    |                             |                             |
| <sup>2</sup> Cell-free RNAs derived from transposable elements.    |                             |                             |
