1 **Depletion-assisted multiplexing cell-free RNA sequencing reveals distinct**  
2 **human and microbial signatures in plasma versus extracellular vesicle**

3

4 Hongke Wang<sup>1,2,†</sup>, Qing Zhan<sup>1,2,†</sup>, Hongjie Guo<sup>3,†</sup>, Jiuliang Zhao<sup>4,5</sup>, Shaozhen Xing<sup>1,2</sup>,  
5 Shanwen Chen<sup>3</sup>, Shuai Zuo<sup>3</sup>, Mengtao Li<sup>4,5,\*</sup>, Pengyuan Wang<sup>3,\*</sup>, Zhi John Lu<sup>1,2,\*</sup>

6 <sup>1</sup> MOE Key Laboratory of Bioinformatics, Center for Synthetic and Systems Biology, School  
7 of Life Sciences, Tsinghua University, Beijing 100084, China

8 <sup>2</sup> Institute for Precision Medicine, Tsinghua University, Beijing 100084, China

9 <sup>3</sup> Translational Cancer Research Center, Division of General Surgery, Peking University First  
10 Hospital, Beijing 100034, China

11 <sup>4</sup> Department of Rheumatology and Clinical Immunology, Chinese Academy of Medical  
12 Sciences & Peking Union Medical College, Beijing 100730, China

13 <sup>5</sup> National Clinical Research Center for Dermatologic and Immunologic Diseases (Ministry of  
14 Science & Technology), MOE Key Laboratory of Rheumatology and Clinical Immunology,  
15 State Key Laboratory of Complex Severe and Rare Diseases, Peking Union Medical College  
16 Hospital, Beijing 100730, China

17

18 \* To whom correspondence should be addressed: Zhi John Lu, Email: [zhilu@tsinghua.edu.cn](mailto:zhilu@tsinghua.edu.cn);

19 Pengyuan Wang, Email: [pengyuan\\_wang@bjmu.edu.cn](mailto:pengyuan_wang@bjmu.edu.cn); Mengtao Li, Email:

20 [mengtao.li@cstar.org.cn](mailto:mengtao.li@cstar.org.cn).

21 † These authors contributed equally to this work.

## 22 **Abstract**

23 In biofluid, long RNAs are more informative than microRNAs in terms of gene number  
24 and variation type. Therefore, cell-free long RNAs have shown promising potential as  
25 biomarkers in liquid biopsy, while they are mostly fragmented. In order to investigate  
26 these fragmented cell-free RNAs (cfRNAs), we developed a cost-effective cfRNA  
27 sequencing method, DETECTOR-seq (depletion-assisted multiplexing cell-free total RNA  
28 sequencing). It utilized a set of customized guide RNAs to remove large amounts of  
29 unwanted RNAs (i.e., fragmented ribosomal and mitochondrial RNAs) in human plasma.  
30 Early barcoding was also incorporated to save cost and plasma volume. After  
31 demonstrating its superior performance to other methods, we used DETECTOR-seq to  
32 investigate cell-free transcriptomes in whole human plasma and extracellular vesicles  
33 (EVs) it contains. We first observed different type distributions: structured circular RNAs,  
34 tRNAs, Y RNAs, and virus RNAs were enriched in plasma, while mRNAs and srpRNAs  
35 were enriched in EVs. We also uncovered distinct functional pathways: RNA splicing-  
36 related ribonucleoproteins (RNPs) and antimicrobial humoral response genes were  
37 enriched in plasma, while transcriptional activity, cell migration, and antigen receptor-  
38 mediated immune signals were enriched in EVs. Subsequently, we compared the  
39 performances of these distinct cfRNAs in whole plasma versus EVs on classifying  
40 cancer patients. The accuracies were comparable when discriminating cancer patients  
41 from healthy donors (AUCs: 0.936 versus 0.953). Meanwhile, cancer types (i.e.,  
42 colorectal versus lung cancer) were better classified with microbial cfRNAs in plasma

43 than in EV (AUCs: 0.898 versus 0.772). Overall, by investigating total and EV cfRNAs in  
44 the pairwise plasma samples, our work provides practical guidance for the proper  
45 decision of EV purification when launching a cfRNA-based study. Furthermore, as a  
46 cost-effective method, DETECTOR-seq would facilitate transcriptome-wide studies in the  
47 fields of extracellular RNA biology and clinical liquid biopsy.

48

## 49 **Key Points**

- 50 1. *DETECTOR-seq enables efficient and specific depletion of sequences derived*  
51 *from fragmented ribosomal and mitochondrial RNAs in plasma.*
- 52 2. *Distinct cfRNA signatures in whole plasma versus EVs were revealed.*
- 53 3. *Both Plasma and EV cfRNAs were capable of distinguishing cancer patients from*  
54 *normal individuals.*
- 55 4. *Microbial RNAs in Plasma cfRNAs enabled better classification of cancer types*  
56 *than EV cfRNAs.*

57

## 58 **Key Words**

59 Cell-free RNA; Extracellular vesicle; Exosome; Cancer classification; Liquid biopsy

60

61

## 62 **Introduction**

63 In recent years, liquid biopsy has emerged as a non-invasive approach for assessing  
64 circulating biomarkers in various body fluids to monitor physiologic and disease states [1].  
65 Cell-free RNAs (cfRNAs), given their virtue of being highly dynamic, hold great potential  
66 to reflect the pathophysiological processes, thus offering unique opportunities for  
67 disease monitoring. Previous reports have suggested that cfRNAs are packaged into  
68 various extracellular complexes, such as extracellular vesicles (EVs, including micro-  
69 vesicles and exosomes) and non-vesicular ribonucleoproteins (RNPs) [2]. Due to the  
70 protection of EV, RNA binding proteins, and/or their self-structures, cfRNAs are capable  
71 of being stably present in human bloodstream [3]. Most cfRNA studies investigated either  
72 total [4-6] or EV [7-9] RNAs in plasma, while gain and loss of EV purification in liquid  
73 biopsy are still under debate. For instance, it is not clear whether the EV purification step  
74 is needed in cfRNA-based cancer screening tests.

75 Efforts in characterizing cfRNAs were initially focused on small RNAs like  
76 microRNAs (miRNAs) because of the nature of RNA degradation and fragmentation in  
77 biofluids. However, miRNAs represent only a small proportion of the human  
78 transcriptome [10]. Therefore, a broader space of cfRNAs, such as messenger RNAs  
79 (mRNAs), long non-coding RNAs (lncRNAs), and circular RNAs (circRNAs) have started  
80 to be investigated later [4-7, 11]. Due to RNases in human blood, these cell-free long  
81 RNA species (>50 nt) have relatively low concentrations. They are usually fragmented  
82 (~50–200 nucleotides), lacking intact RNA ends [12]. The conventional small RNA-seq

83 approach, which ligates sequencing adapters based on RNA ends of 5' phosphate (5' P)  
84 and 3' hydroxyl (3' OH), does not work well for these fragmented cfRNAs [13].

85 Recently, several sequencing approaches have been developed to profile cell-free  
86 long RNA fragments. Phospho-RNA-seq incorporates T4 polynucleotide kinase into  
87 ligation-based TruSeq small RNA-seq [12]. Thus, it can recover mRNA and lncRNA  
88 fragments lacking 5' P and/or 3' OH ends. However, as the authors mentioned, the  
89 libraries of Phospho-RNA-seq contained high fractions of ribosomal RNAs (rRNAs) and  
90 Y RNAs, reducing the capacity to detect other informative RNA species [12]. Another  
91 method, SILVER-seq, captures both small and long cfRNAs from extremely low-input  
92 serum samples [14]. However, substantial DNA contamination seemed to be an issue of  
93 SILVER-seq [15]. Recently, SMARTer stranded total RNA-seq (hereafter called  
94 SMARTer-seq) was used in several cfRNA studies [4-7], where unwanted ribosomal  
95 sequences were depleted using a proprietary R-probe-based system called ZapR [16,  
96 17]. However, as a commercial kit, SMARTer-seq was not specifically optimized for  
97 cfRNA library in plasma. It is not cost-efficient either. Overall, the current cfRNA  
98 sequencing approaches were limited by unwanted RNAs, DNA contamination, and high  
99 cost.

100 In this study, we present an optimized cfRNA sequencing method, DETECTOR-seq  
101 (depletion-assisted multiplexing cell-free total RNA sequencing), which utilizes early  
102 barcoding and CRISPR-Cas9 to reduce the cost and high-abundant, fragmented rRNAs  
103 and mitochondrial RNAs (mtRNAs) in human plasma. Then, we used DETECTOR-seq to

104 investigate 113 plasma cfRNA samples (including 61 plasma total RNA and 52 EV RNA  
105 libraries) derived from healthy donors, lung and colorectal cancer patients. To the best of  
106 our knowledge, this study is the first to compare pairwise total and EV-selected  
107 transcriptomes in the same plasma samples, suggesting their distinct signatures and  
108 different utilities in the liquid biopsy of cancer.

109

110

## 111 **Methods**

### 112 **Issues of sequencing cell-free RNAs**

113 The sequencing of cfRNAs in plasma and other biofluids usually meets the following  
114 obstacles. First, consistent with previous reports [10], we observed that plasma cfRNAs  
115 were degraded with a fragment length of <200 nucleotides (**Figure 1A**). These  
116 fragmented cfRNAs are hard to be detected by many RNA-seq protocols based on  
117 ligation techniques requiring intact RNA ends. Second, ribosomal RNAs (rRNAs) and  
118 mitochondrial RNAs (mtRNAs) accounted for ~92% of all clean reads (reads after  
119 removing adapters and filtering low-quality reads), while messenger RNAs (mRNAs) and  
120 long non-coding RNAs (lncRNAs) collectively made up only a small fraction (~4%) of  
121 cell-free transcriptome (**Figure 1B**). It is worth noting that microbe-derived RNAs can  
122 also be detected in human plasma with a relatively small fraction (~0.4%) (**Figure 1B**).  
123 The high fractions of rRNAs and mtRNAs hamper the detection of other informative RNA  
124 species. And they are fragmented into pieces in plasma, making them hard to be

125 removed (**Figures 1C, D**). Third, cfRNAs are usually in the range of hundred picograms  
126 to several nanograms per ml of human plasma [14], which can be easily lost and  
127 contaminated during purification and amplification. For instance, low cfRNA input usually  
128 requires 20-24 PCR amplification cycles for library preparation, which produces a high  
129 duplication ratio of raw reads. Meanwhile, DNA contamination ignorable in conventional  
130 RNA-seq is often over-amplified, causing a big issue in cfRNA-seq [15].

131

### 132 **DETECTOR-seq**

133 To improve the efficiency and reliability of cfRNA detection, we developed DETECTOR-  
134 seq (depletion-assisted multiplexing cell-free total RNA sequencing) to profile cell-free  
135 transcriptome in human plasma (**Figures 1E, F**). DETECTOR-seq captures fragmented  
136 cfRNAs with unbiased random priming and template-switching. Then, it uses CRISPR-  
137 Cas9 to remove the abundant sequences derived from ribosomal and mitochondrial  
138 RNAs in the complementary DNA (cDNA) library. In this step, guide RNAs (sgRNAs) in  
139 the CRISPR-Cas9 are specifically optimized for human plasma cfRNAs (**Supplementary**  
140 **Figures 1,2**), covering the fragmented rRNA and mtRNA sequences (**Figures 1D, E**).  
141 The sgRNAs are in vitro transcribed using T7 RNA polymerase, then bind with Cas9  
142 nuclease to form ribonucleoprotein (RNP) complex and induce site-specific cleavage  
143 with the endonuclease activity of Cas9 (**Figure 1E**), thus preventing further amplification  
144 of cDNAs derived from rRNAs and mtRNAs in the final sequencing library. Meanwhile,  
145 DETECTOR-seq utilizes early barcoding during reverse transcription. The multiplexed

146 library will cope with low content of plasma cfRNAs, and reduce experimental time and  
147 cost as well. It is also worth mentioning that unique molecular identifiers (UMIs) are  
148 added to every sequence in the reverse transcription step, hence DETECTOR-seq is  
149 capable of removing PCR duplicates to avoid RNA quantification bias (**Figure 1F**). In  
150 addition, we also optimized cfRNA extraction (**Supplementary Figure 3**) and residual  
151 DNA digestion (**Supplementary Figure 4**) protocols.

152

### 153 **Depletion of rRNA and mtRNA sequences in human plasma**

154 To examine whether DETECTOR-seq can deplete the unwanted rRNA and mtRNA  
155 sequences effectively and specifically, we split a single plasma sample into two equal  
156 aliquots for experimental conditions of untreated versus depleted, with six biological  
157 replicates. In the untreated samples, reads mapped to rRNAs and mtRNAs collectively  
158 represented ~94% of all mapped reads. After CRISPR-Cas9 treatment, these unwanted  
159 sequences were decreased to only ~15% of mapped reads, only about one-sixth of the  
160 untreated ones (**Figure 2A**). By comparing untreated and depleted aliquots, we  
161 observed evident decreases in the normalized coverage of rRNAs and mtRNAs (**Figure**  
162 **2B**). Meanwhile, the expression levels of detected genes other than rRNAs and mtRNAs  
163 between the untreated and depleted aliquots were well correlated, indicating minimal off-  
164 target effect (Pearson correlation,  $R: 0.92$ ,  $P\text{-value} < 2.2 \times 10^{-16}$ ; **Figure 2C**). By comparing  
165 the cfRNA expression profiles obtained from DETECTOR-seq and SMARTer-seq, we  
166 found that the expression levels of detected genes using these two methods were also



167 well correlated (Pearson correlation,  $R=0.90$ ,  $P$ -value  $< 2.2 \times 10^{-16}$ ; **Figure 2D**). In summary,  
168 the above results demonstrate the efficient and specific depletion of unwanted  
169 sequences in DETECTOR-seq.

170

171

## 172 **Results**

### 173 **Analytical validation analysis demonstrating high-quality reads of DETECTOR-seq**

174 To evaluate the performance of DETECTOR-seq, we prepared cfRNA libraries in a 3-  
175 plex, 4-plex, or 5-plex manner determined by RNA concentrations. The total read  
176 numbers of different barcoded samples in one multiplexing pool were relatively uniform,  
177 varying less than 1.5-fold in the 3- and 4-plex samples and less than 3-fold in the 5-plex  
178 samples (**Figure 3A**). In addition, the UMI strategy in DETECTOR-seq retained  
179 significantly more reads than the non-UMI approach after duplicated reads were  
180 removed (**Figure 3B**). And a sharp edge of reads' distribution across exon-intron splice  
181 junctions suggested that the majority of DNA contamination was effectively removed  
182 (**Figure 3C**). To evaluate the impact of plasma input volume on the number of detected  
183 genes, we sequenced cfRNAs with 200, 400, 600, 800, and 1000  $\mu$ L of plasma aliquots  
184 from the same individual with five biological replicates. Around 4000 genes were  
185 detected with the minimum (i.e., 200  $\mu$ L) volume. The detected gene number linearly  
186 increased until a plateau between 800 and 1000  $\mu$ L, suggesting the detected genes  
187 would be saturated after 1 mL of plasma (**Figure 3D**). While highly correlated cfRNA

188 expression levels were observed within technical triplicates (R1-R3), the correlations  
189 were slightly decreased between biological triplicates (N1-N3) (**Figure 3E**). Furthermore,  
190 based on ERCC RNA Spike-In Mix, we found a high correlation between expected and  
191 observed levels of transcript abundance (Pearson correlation,  $R=0.91$ ,  $P\text{-value} < 2.2 \times 10^{-16}$ ;  
192 **Figure 2F**). These results not only demonstrate DETECTOR-seq's high quality and  
193 reproducibility but also suggest its capability of capturing subtle differences in cfRNA  
194 profiles between different individuals.

195 Then, we randomly subsampled a dataset ( $n=24$ ) of DETECTOR-seq for saturation  
196 analyses of detected UMIs (transcripts) and genes. Although the detected UMIs kept  
197 increasing when more reads in 1ml plasma were sequenced (**Figure 3G**), the detected  
198 gene numbers were quickly saturated at approximately 5 million genome-aligned reads  
199 (**Figure 3H**). These results indicate that DETECTOR-seq achieves saturation of cfRNA  
200 detection at a low sequencing depth.

201

## 202 **Better contamination control and cost-effectiveness of DETECTOR-seq than other** 203 **cfRNA-seq methods**

204 We benchmarked the performance of DETECTOR-seq compared to three other cfRNA-  
205 seq methods, including Phospho-RNA-seq [12], SILVER-seq [14], and SMARTer-seq  
206 [18]. Within the total genome-aligned reads, DETECTOR-seq and SMARTer-seq had  
207 comparable ratios of exonic reads (~70%), while those of SILVER-seq and Phospho-  
208 RNA-seq were under 40% (**Figure 4A**). The lower ratio of exonic reads for SILVER-seq

209 was presumably due to severe DNA contamination according to a previous report [15].  
210 We also visualized the read coverage across exon boundary sites flanked upstream and  
211 downstream by 50 bp, where DETECTOR-seq and SMARTer-seq showed more evident  
212 decreases of read coverage from exon to intron/intergenic region than SILVER-seq and  
213 Phospho-RNA-seq (**Figure 4B**). As far as we know, all of the four cell-free RNA-seq  
214 methods should preserve the strand specificity of RNAs. Thus, the enrichment of exons'  
215 sense over antisense reads of DETECTOR-seq and SMARTer-seq further confirmed  
216 their reads' quality (**Figure 4C**). The above results demonstrate that DETECTOR-seq  
217 and SMARTer-seq have better DNA contamination control than SILVER-seq. It was  
218 worth noting that Phospho-RNA-seq was developed from a small RNA-seq method, and  
219 the read coverage across exon boundary sites and the enrichment of exons' sense over  
220 antisense reads may be affected by the read distribution of small RNAs.

221 In addition, we showed that DETECTOR-seq displayed a higher ratio of reads  
222 mapped to human genome (~71%) than those of SMARTer-seq (~48%) because  
223 DETECTOR-seq removed mitochondrial RNAs more efficiently than SMARTer-seq  
224 (**Figure 4D**). Furthermore, because of its early barcoding and multiplexing strategy,  
225 DETECTOR-seq can produce more raw reads and genome-aligned reads than the other  
226 cfRNA-seq approaches (**Figure 4E, Supplementary Figure 5**). Overall, by summarizing  
227 and comparing key characteristics of these approaches (**Figure 4F**), we collectively  
228 demonstrate that DETECTOR-seq has better contamination control and more efficient  
229 cost than the other cfRNA-seq methods.

230

231 **Distinct human and microbial RNA signatures in plasma versus extracellular**  
232 **vesicle**

233 Subsequently, we utilized DETECTOR-seq to comprehensively investigate total cfRNAs  
234 and EV cfRNAs pairwise in human plasma (**Figure 5A**). A proportion of cfRNAs are  
235 enclosed inside EVs such as MVs and exosomes [19]. Meanwhile, it is also reported that  
236 a significant proportion of cfRNAs are not within EVs but associated with proteins to form  
237 non-vesicular RNPs [20]. Although both total cfRNAs [4-6] and EV cfRNAs [7, 9] have  
238 been used in the liquid biopsy studies, their distinct signals and utilities have not been  
239 pairwise compared yet.

240 In total, we sequenced 139 plasma cfRNA samples derived from healthy donors,  
241 lung cancer and colorectal cancer patients (**Supplementary Figure 6**). Then, 113  
242 datasets passed quality control (QC) procedures of RNA samples and sequencing data  
243 (**Supplementary Figures 6-8**). Among them, 61 were total cfRNA-seq and 52 were EV  
244 cfRNA-seq, where 44 were paired from the same plasma samples. In the following  
245 description, total cfRNA-seq of plasma and EV cfRNA-seq of plasma will be abbreviated  
246 to *Plasma* cfRNA and *EV* cfRNA, respectively.

247 From a general view, there was a high degree of similarity between *Plasma* and *EV*  
248 cfRNAs, with ~90% of aligned reads mapping to human genome and ~10% mapping to  
249 microbe genomes (**Figure 5B**). For human cfRNAs, mRNA, lncRNA, and circRNA were  
250 the major RNA types. For microbial cfRNAs, the most abundant phylum was

251 *Proteobacteria*, followed by *Firmicutes* and *Actinobacteria*. The human and microbial  
252 RNA compositions resembled previous reports [18, 21].

253 In addition, distinctive signatures were revealed for the first time by our pairwise  
254 comparison between *Plasma* and *EV* cfRNAs. We first observed that *Plasma* cfRNAs  
255 had more short fragments (50~100 nt), while *EV* cfRNAs had more long fragments (>100  
256 nt) (**Supplementary Figure 12**). We also observed that structured tRNAs, Y RNAs, and  
257 circRNAs were significantly enriched in *Plasma* cfRNAs, while mRNAs and signal  
258 recognition particle RNAs (srpRNAs) were significantly enriched in *EV* cfRNAs (**Figure**  
259 **5C**). This is consistent with a previous study reporting that tRNA and Y RNA fragments  
260 were significantly enriched in extracellular RNPs [2]. Moreover, we also found that the  
261 relative abundance of circRNAs was significantly higher in *Plasma* cfRNAs than *EV*  
262 cfRNAs ( $P$ -value < 0.0001, Wilcoxon rank sum test; **Figure 5C, Supplementary Figure**  
263 **9**), perhaps due to its circle-like structure resisting degradation outside of EVs. We totally  
264 identified 13 circRNAs differentially enriched in *Plasma* versus *EV* cfRNAs. Only one of  
265 them, hsa\_circ\_0048555, was enriched in EVs (**Supplementary Figure 10**). Reads  
266 mapped to the back-spliced junction were used to calculate the enrichment.

267 A recent study provided a framework to infer cell types of origin of the cell-free  
268 transcriptome [22]. We utilized this method and found a high similarity of the cell types of  
269 origin between *Plasma* and *EV* transcriptomes (**Figure 5D**). Platelets and erythrocytes  
270 were inferred as the major origins for both *Plasma* and *EV* cfRNAs, which was in  
271 agreement with the previous study [22]. Intriguingly, we found non-blood cells

272 contributed more to *EV* cfRNAs than to *Plasma* cfRNAs ( $P$ -value < 0.01, Wilcoxon rank  
273 sum test; **Figure 5D**). Therefore, the diversities of cell types of origin (measured by  
274 Simpson's index) of *EV* cfRNAs were significantly higher than those of *Plasma* cfRNAs  
275 ( $P$ -value < 0.01, Wilcoxon rank sum test; **Figure 5D**).

276 We also identified distinct microbe genera in *Plasma* and *EV* cfRNAs  
277 (**Supplementary Figure 11**). Although there was no significant difference between the  
278 ratio of microbe reads in *Plasma* and *EV* cfRNAs, we found cfRNAs mapped to virus  
279 genomes were significantly elevated in *Plasma* cfRNAs (**Figure 5E**). Meanwhile, viruses  
280 such as *Senecavirus*, *Cheravirus*, *Orthopoxvirus*, *Tenuivirus*, and *Rhadinovirus* were  
281 significantly enriched in *Plasma* cfRNAs, while *Intestinimonas*, *Mordavella*, and  
282 *Jonquetella* were significantly enriched in *EV* cfRNAs (**Figure 5F**). In summary, the  
283 above comparison results have revealed distinct molecular characteristics between  
284 *Plasma* and *EV* cfRNAs in terms of fragment size, RNA species, cell types of origin, and  
285 microbe genera.

286

### 287 **Functional pathways and sequence motifs of selective *Plasma* and *EV* cfRNAs**

288 To find selective functions and motifs of cfRNAs in EVs, we identified 545 selectively  
289 distributed RNAs showing significantly differential abundance between *Plasma* and *EV*  
290 transcriptomes ( $|\text{Fold-change}| > 1$  and  $\text{FDR} < 0.1$ ; **Figure 6A, Supplementary Figure**  
291 **13**). Among them, 271 cfRNAs were enriched in *Plasma*, while 274 cfRNAs were  
292 enriched in *EVs*. We investigated the functional roles and biological pathways of these

293 selective cfRNAs (**Figure 6B, Supplementary Figure 14**). Based on KEGG pathway  
294 enrichment analysis, we found that the selective RNAs elevated in *Plasma* were  
295 significantly enriched in terms associated with RNA splicing, RNP (e.g., mRNA 5' splice  
296 site recognition, U1 snRNP, spliceosomal snRNP complex and Sm-like protein family  
297 complex), antimicrobial and innate immune responses. Meanwhile, the selective RNAs  
298 that were enriched in *EVs* were primarily associated with DNA binding transcription  
299 factor activity, focal adhesion, cell-substrate junction, and T cell receptor signaling  
300 immune pathway. Notably, we found different immune pathways enriched in the selective  
301 cfRNAs of *Plasma* versus *EVs* (**Figure 6B, Supplementary Figure 14**).

302 We further investigated sequence motifs and their associated RNA binding proteins  
303 (RBPs) for the selective cfRNAs (**Figure 6C, Supplementary Figure 15**). And we found  
304 that the selective cfRNAs enriched in *Plasma* contained binding motifs/sites for ABCF1,  
305 a protein that plays a role in innate immune response [23]; SFPQ, a splicing factor;  
306 LARP4, a La RNP; TROVE2, a Y RNA binding protein; and DKC1, a snoRNP. Meanwhile,  
307 the selective cfRNAs enriched in *EVs* contained binding motifs/sites for PUM1, a protein  
308 that participates in human innate immune response [24]; BCLAF1, a transcription factor;  
309 HNRNPU, a transcription suppressor; PCBP1, a previously reported immune checkpoint  
310 [25]; APOBEC3C, an RNA editing enzyme. These enriched motifs and their associated  
311 RBPs were consistent with the biological functions of the selective cfRNAs revealed  
312 above.

313

314 **Specific cancer signals revealed in *Plasma* and *EV* cfRNAs**

315 In order to demonstrate whether the EV purification step is needed for a cfRNA-based  
316 cancer test, we compared the cancer classification performance of *Plasma* cfRNAs and  
317 *EV* cfRNAs. We sequenced cfRNAs in the plasma samples of lung cancer (LC) and  
318 colorectal cancer (CRC) patients, as they are two major cancer types (**Supplementary**  
319 **Figure 6**). Based on differential expression analysis between cancer and normal control  
320 (NC) ( $|\log_2\text{fold-change}| > 1$  and  $\text{FDR} < 0.05$ ), we defined a set of cancer-relevant cfRNAs  
321 (**Supplementary Figure 16**). Interestingly, we found that they were remarkably enriched  
322 in *Plasma* compared to *EVs* (**Figure 7A**). We also found that enriched functions of these  
323 cancer-relevant *Plasma* cfRNAs were termed as RNA splicing, snRNP signals, etc  
324 (**Figure 7B**). This is consistent with the enriched pathways of *Plasma* cfRNAs revealed  
325 in **Figure 6B**.

326 Based on these selectively distributed cancer-relevant cfRNAs, we used a random  
327 forest classifier to discriminate cancer patients from NCs. Although the selective cfRNAs  
328 in *Plasma* performed slightly better than those in *EVs* (average AUROC: 0.909 versus  
329 0.877, **Figure 7C**, **Supplementary Figure 17**), comparable performances were observed  
330 between *Plasma* and *EV* cfRNAs when a large number of non-selective cfRNAs  
331 (**Figures 6A**, **7A**) were included as well (average AUROC: 0.936 versus 0.953, **Figure**  
332 **7D**, **Supplementary Figure 18**). Collectively, these results imply that the EV purification  
333 step can reveal distinct cancer signals, but it has a very subtle effect on the accuracy of  
334 detection of cancer patients from healthy controls.



335

336 **Microbial cfRNAs in *Plasma* classify cancer types better than *EV* cfRNAs**

337 Cancer screening test not only requires detecting cancer patients from normal controls  
338 but also needs to determine primary tumor locations. Therefore, we further compared the  
339 performances of human cfRNAs in *Plasma* and *EV* for classifying CRC from LC.

340 First, we found none of them did a good job (average AUROC: 0.628 versus 0.659,  
341 **Figure 7E, Supplementary Figure 19**). Fortunately, a recent study of our group  
342 revealed that microbe-derived cfRNAs in human plasma reflect cancer-type-specific  
343 information [18]. Based on the RNA abundance levels of the contamination-filtered  
344 microbe genera, we found the microbial cfRNAs significantly improved the classification  
345 for both *Plasma* and *EV* cfRNA data (average AUC: 0.898 versus 0.772, **Figure 7E,**  
346 **Supplementary Figure 19**).

347 Notably, the microbial reads in *Plasma* cfRNAs performed better than those in *EV*  
348 cfRNAs. Consistently, we also found more cancer-type-specific features in *Plasma*  
349 cfRNAs than in *EV* cfRNAs (**Figure 7F**). We identified the microbial features recurrently  
350 showing differential abundance between CRC and LC in all of the 20 bootstrap  
351 samplings. The abundance of top recurrent microbe genera, along with fold-change and  
352 false discovery rates were illustrated (**Figure 7G**). For instance, more *Methanotherix*  
353 reads were found in CRC than in LC using *EV* cfRNA-seq data. This is consistent with a  
354 previous study reporting that *Methanotherix soehngenii* was enriched in gut microbiome of  
355 CRC patients [26]. Meanwhile, many cancer-relevant virus RNAs in *Plasma* cfRNAs

356 classified cancer types, consistent with the observation of more virus RNAs detected in  
357 *Plasma* than in *EVs* (**Figure 5E**). For instance, more reads of *Alpha-polyomavirus* and  
358 *Beta-polyomavirus* were found in LC than in CRC using *Plasma* cfRNA-seq data.  
359 Supportively, some polyomaviruses were also reported to be detectable in  
360 gastrointestinal tract and respiratory aspirates [27]. These studies and results suggest  
361 that microbe-derived cfRNAs in *Plasma* and *EV* present promising but yet poorly  
362 investigated signatures for specific cancer types.

363

364

## 365 **Conclusion and Discussion**

366 **Conclusions.** In summary, this study introduced a depletion-assisted cost-effective  
367 cfRNA profiling approach, termed DETECTOR-seq, which utilized multiple technologies  
368 such as early barcoding, template-switching, UMI, and sgRNA/CRISPR-Cas9. Using  
369 DETECTOR-seq, we recapitulated molecular characteristics of *Plasma* and *EV* cfRNAs  
370 and identified their distinct human and microbial signatures, thus illustrating the gain and  
371 loss of certain cfRNA signals due to EV purification. Our work provides a practical guide  
372 for cfRNA-based liquid biopsy (**Table 1**). Moreover, we envision that DETECTOR-seq  
373 would be a useful tool to facilitate further studies in extracellular RNA biology.

374

375 **Technologies utilized and optimized in DETECTOR-seq.** *Plasma* cell-free  
376 transcriptome remains challenging to study owing to the low quantity and quality of

377 fragmented RNAs [11]. Over-represented rRNA and mtRNA species [12], DNA  
378 contamination [15], and high cost are still the major issues of cfRNA sequencing. Multiple  
379 technologies were included in DETECTOR-seq to address these issues (**Figure 4F**).  
380 First, DETECTOR-seq captures fragmented cfRNAs with random priming and template-  
381 switching strategies, which have been proven to be highly efficient in single-cell RNA-  
382 seq [28]. Second, the early barcoding protocol of DETECTOR-seq enables us to prepare  
383 cfRNA libraries in a multiplexing manner, thus reducing the volume of required plasma  
384 and experimental costs. In fact, DETECTOR-seq is capable of detecting cfRNAs with a  
385 low input volume of 0.2 to 1 mL plasma with a 2- to 6-fold cost saving compared to  
386 existing approaches. Third, with UMIs tagging to cDNAs of RNA fragments, DETECTOR-  
387 seq can accurately quantify the low-quantity cfRNAs. Fourth, by optimizing the  
388 procedures of RNA extraction and residual DNA digestion (**Supplementary Figures 3-4**),  
389 DETECTOR-seq avoids the potential contamination of genomic DNAs. Fifth,  
390 DETECTOR-seq uses CRISPR-Cas9 technology to deplete rRNA and mtRNA  
391 sequences. A CRISPR-based depletion strategy, DASH (Depletion of Abundant  
392 Sequences by Hybridization) [29] has been utilized in other fields, such as ATAC-seq  
393 [30], small RNA-seq [31], bacterial RNA-seq [32] and single-cell total RNA-seq [33]. Here,  
394 we applied this CRISPR-based method to cfRNA sequencing and designed a specific  
395 set of sgRNAs for human plasma (**Supplementary Figures 1,2**).

396 ***Plasma vs. EV in cancer detection and cancer type classification.*** Researchers  
397 have used both *Plasma* cfRNA-seq [4-6] and *EV* cfRNA-seq [7, 19, 34-36] to identify

398 disease biomarkers. But which one is better is still not clear. By pairwise comparison  
399 between *Plasma* and *EV* cfRNA-seq, we found that both of them can distinguish cancer  
400 patients from controls with comparable performance. However, cancer types can be  
401 better classified with microbe-derived features in *Plasma* cfRNAs than those in *EV*  
402 cfRNAs.

403 **Distinct signatures in *Plasma* vs. *EV* cfRNAs.** Moreover, this study has brought  
404 new insights into distinct cfRNA signatures in *Plasma* versus *EVs*. *Plasma* contains  
405 miscellaneous cfRNAs released from alive or apoptotic cells, while RNAs in *EV* cargos  
406 are considered to be secreted actively by cells for functional roles in intercellular  
407 communications [37]. This study revealed distinct biological pathways, enriched motifs,  
408 and RBP-binding sites in *Plasma* vs. *EV* cfRNAs. We also found that short RNA  
409 fragments (50 to 100 nt) associated with RNPs were enriched in *Plasma* cfRNAs,  
410 indicating higher degradation extent of non-vesicular RNAs than those of *EV* RNAs.

411 **Limitations of this study.** Though DETECTOR-seq provides several advantages  
412 when compared with other approaches, it needs to be further improved. For example,  
413 the efficiency of random priming of DETECTOR-seq is proportional to the fragment  
414 length of RNAs, which will bias the library. Meanwhile, DETECTOR-seq includes several  
415 purification steps to remove by-products, such as empty library constructs, adapter  
416 dimers, and superfluous primers. Because these purification procedures retain longer  
417 products, RNA fragments shorter than 50 nucleotides are largely discarded along with  
418 by-products. Thus, DETECTOR-seq can be modified based on other strategies like

419 poly(A) tailing to obtain a complete spectrum of cfRNAs, including both small and long  
420 fragments [38, 39].

421

422

## 423 **Declarations**

### 424 **Ethics approval and consent to participate**

425 This study was approved by the institutional review board of Peking University First  
426 Hospital (2018-15). Informed consent was obtained from all patients.

### 427 **Availability of data and materials**

428 Data generated with DETECTOR-seq are available at the Gene Expression Omnibus  
429 under accession number GSE216561. For benchmarking, we used the following  
430 datasets: GSE126049 (Phospho-RNA-seq), GSE131512 (SILVER-seq), and  
431 GSE174302 (SMARTer-seq).

### 432 **Competing interests**

433 A patent application on the described technology has been filed by HKW and ZJL. Other  
434 authors declare no conflict of interest.

### 435 **Funding**

436 This work is supported by Tsinghua University Spring Breeze Fund (2021Z99CFY022),  
437 National Natural Science Foundation of China (81972798, 32170671, 81902384),  
438 National Key Research and Development Plan of China (2019YFC1315700), National  
439 Science and Technology Major Project of China (2018ZX10723204, 2018ZX10302205),

440 Tsinghua University Guoqiang Institute Grant (2021GQG1020), Tsinghua University  
441 Initiative Scientific Research Program of Precision Medicine (2022ZLA003),  
442 Bioinformatics Platform of National Center for Protein Sciences (Beijing) (2021-NCPSB-  
443 005). This study is also supported by Beijing Advanced Innovation Center for Structural  
444 Biology, Bio-Computing Platform of Tsinghua University Branch of China National Center  
445 for Protein Sciences, Interdisciplinary Clinical Research Project of Peking University First  
446 Hospital, and the Capital Health Research and Development of Special, Open Research  
447 Fund Program of Beijing National Research Center for Information Science and  
448 Technology. *Funding for open access charge: Tsinghua University Spring Breeze Fund*  
449 *[2021Z99CFY022].*

## 450 **References**

451

452 1. Heitzer E, Haque IS, Roberts CES, Speicher MR: **Current and future perspectives of**  
453 **liquid biopsies in genomics-driven oncology.** *Nature Reviews Genetics* 2019, **20**:71-88.

454 2. Wei ZY, Batagov AO, Schinelli S, Wang JT, Wang Y, El Fatimy R, Rabinovsky R, Balaj L,  
455 Chen CC, Hochberg F, et al: **Coding and noncoding landscape of extracellular RNA**  
456 **released by human glioma stem cells.** *Nature Communications* 2017, **8**:1-15.

457 3. Gruner HN, McManus MT: **Examining the evidence for extracellular RNA function in**  
458 **mammals.** *Nature Reviews Genetics* 2021, **22**:448-458.

459 4. Moufarrej MN, Vorperian SK, Wong RJ, Campos AA, Quaintance CC, Sit RV, Tan M,  
460 Detweiler AM, Mekonen H, Neff NF, et al: **Early prediction of preeclampsia in pregnancy**  
461 **with cell-free RNA.** *Nature* 2022, **602**:689-694.

462 5. Rasmussen M, Reddy M, Nolan R, Camunas-Soler J, Khodursky A, Scheller NM,  
463 Cantonwine DE, Engelbrechtsen L, Mi JD, Dutta A, et al: **RNA profiles reveal signatures**  
464 **of future health and disease in pregnancy.** *Nature* 2022, **601**:422-427.

465 6. Ngo TTM, Moufarrej MN, Rasmussen MLH, Camunas-Soler J, Pan WY, Okamoto J, Neff  
466 NF, Liu KL, Wong RJ, Downes K, et al: **Noninvasive blood tests for fetal development**  
467 **predict gestational age and preterm delivery.** *Science* 2018, **360**:1133-1136.

468 7. Yu S, Li Y, Liao Z, Wang Z, Wang Z, Li Y, Qian L, Zhao J, Zong H, Kang B, et al: **Plasma**  
469 **extracellular vesicle long RNA profiling identifies a diagnostic signature for the detection**  
470 **of pancreatic ductal adenocarcinoma.** *Gut* 2020, **69**:540-550.

- 471 8. Li YC, Zhao JL, Yu SL, Wang Z, He XG, Su YH, Guo TAN, Sheng HY, Chen J, Zheng QP,  
472 et al: **Extracellular Vesicles Long RNA Sequencing Reveals Abundant mRNA, circRNA,**  
473 **and lncRNA in Human Blood as Potential Biomarkers for Cancer Diagnosis.** *Clinical*  
474 *Chemistry* 2019, **65**:798-808.
- 475 9. Ji J, Chen R, Zhao L, Xu YL, Cao Z, Xu H, Chen X, Shi XL, Zhu YS, Lyu J, et al:  
476 **Circulating exosomal mRNA profiling identifies novel signatures for the detection of**  
477 **prostate cancer.** *Molecular Cancer* 2021, **20**:58.
- 478 10. Larson MH, Pan WY, Kim HJ, Mauntz RE, Stuart SM, Pimentel M, Zhou YQ, Knudsgaard  
479 P, Demas V, Aravanis AM, Jamshidi A: **A comprehensive characterization of the cell-free**  
480 **transcriptome reveals tissue- and subtype-specific biomarkers for cancer detection.**  
481 *Nature Communications* 2021, **12**:1-11.
- 482 11. Cabus L, Lagarde J, Curado J, Lizano E, Perez-Boza J: **Current challenges and best**  
483 **practices for cell-free long RNA biomarker discovery.** *Biomarker Research* 2022, **10**:62.
- 484 12. Giraldez MD, Spengler RM, Etheridge A, Goicochea AJ, Tuck M, Choi SW, Galas DJ,  
485 Tewari M: **Phospho-RNA-seq: a modified small RNA-seq method that reveals circulating**  
486 **mRNA and lncRNA fragments as potential biomarkers in human plasma.** *EMBO J* 2019,  
487 **38**:e101695.
- 488 13. Akat KM, Lee YA, Hurley A, Morozov P, Max KE, Brown M, Bogardus K, Sopeyin A,  
489 Hildner K, Diacovo TG, et al: **Detection of circulating extracellular mRNAs by modified**  
490 **small-RNA-sequencing analysis.** *JCI Insight* 2019, **5**:e127317.



- 491 14. Zhou Z, Wu Q, Yan Z, Zheng H, Chen CJ, Liu Y, Qi Z, Calandrelli R, Chen Z, Chien S, et  
492 al: **Extracellular RNA in a single droplet of human serum reflects physiologic and disease**  
493 **states.** *Proc Natl Acad Sci U S A* 2019, **116**:19200-19208.
- 494 15. Verwilt J, Trypsteen W, Van Paemel R, De Preter K, Giraldez MD, Mestdagh P,  
495 Vandesompele J: **When DNA gets in the way: A cautionary note for DNA contamination**  
496 **in extracellular RNA-seq studies.** *Proc Natl Acad Sci U S A* 2020, **117**:18934-18936.
- 497 16. Stark R, Grzelak M, Hadfield J: **RNA sequencing: the teenage years.** *Nature Reviews*  
498 *Genetics* 2019, **20**:631-656.
- 499 17. Farmer AA, Betts C, Bolduc N: **Methods of depleting a target molecule from an initial**  
500 **collection of nucleic acids, and compositions and kits for practicing the same.** 2018.
- 501 18. Chen S, Jin Y, Wang S, Xing S, Wu Y, Tao Y, Ma Y, Zuo S, Liu X, Hu Y, et al: **Cancer**  
502 **type classification using plasma cell-free RNAs derived from human and microbes.** *Elife*  
503 2022, **11**:e75181.
- 504 19. Moller A, Lobb RJ: **The evolving translational potential of small extracellular vesicles in**  
505 **cancer.** *Nat Rev Cancer* 2020, **20**:697-709.
- 506 20. Arroyo JD, Chevillet JR, Kroh EM, Ruf IK, Pritchard CC, Gibson DF, Mitchell PS, Bennett  
507 CF, Pogosova-Agadjanyan EL, Stirewalt DL, et al: **Argonaute2 complexes carry a**  
508 **population of circulating microRNAs independent of vesicles in human plasma.** *Proc Natl*  
509 *Acad Sci U S A* 2011, **108**:5003-5008.
- 510 21. Pan WY, Ngo TTM, Camunas-Soler J, Song CX, Kowarsky M, Blumenfeld YJ, Wong RJ,

- 511 Shaw GM, Stevenson DK, Quake SR: **Simultaneously Monitoring Immune Response and**  
512 **Microbial Infections during Pregnancy through Plasma cfRNA Sequencing.** *Clinical*  
513 *Chemistry* 2017, **63**:1695-1704.
- 514 22. Vorperian SK, Moufarrej MN, Tabula Sapiens C, Quake SR: **Cell types of origin of the**  
515 **cell-free transcriptome.** *Nat Biotechnol* 2022, **40**:855-861.
- 516 23. Lee MN, Roy M, Ong SE, Mertins P, Villani AC, Li WB, Dotiwala F, Sen J, Doench JG,  
517 Orzalli MH, et al: **Identification of regulators of the innate immune response to cytosolic**  
518 **DNA and retroviral infection by an integrative approach.** *Nature Immunology* 2013,  
519 **14**:179-185.
- 520 24. Liu YH, Qu LL, Liu YY, Roizman B, Zhou GG: **PUM1 is a biphasic negative regulator of**  
521 **innate immunity genes by suppressing LGP2.** *Proceedings of the National Academy of*  
522 *Sciences of the United States of America* 2017, **114**:6902-6911.
- 523 25. Ansa-Addo EA, Huang HC, Riesenber B, Iamaswat S, Borucki D, Nelson MH, Nam JH,  
524 Chung D, Paulos CM, Liu B, et al: **RNA binding protein PCBP1 is an intracellular immune**  
525 **checkpoint for shaping T cell responses in cancer immunity.** *Science Advances* 2020,  
526 **6**:3865.
- 527 26. Coker OO, Wu WKK, Wong SH, Sung JJY, Yu J: **Altered Gut Archaea Composition and**  
528 **Interaction With Bacteria Are Associated With Colorectal Cancer.** *Gastroenterology* 2020,  
529 **159**:1459-1470.
- 530 27. Moens U, Calvignac-Spencer S, Lauber C, Ramgvist T, Feltkamp MCW, Daugherty MD,

- 531           Verschoor EJ, Ehlers B, Consortium IR: **ICTV Virus Taxonomy Profile: Polyomaviridae.**  
532           *Journal of General Virology* 2017, **98**:1159-1160.
- 533    28.    Verboom K, Everaert C, Bolduc N, Livak KJ, Yigit N, Rombaut D, Anckaert J, Lee S,  
534           Veno MT, Kjems J, et al: **SMARTer single cell total RNA sequencing.** *Nucleic Acids*  
535           *Research* 2019, **47**:e93.
- 536    29.    Gu W, Crawford ED, O'Donovan BD, Wilson MR, Chow ED, Retallack H, DeRisi JL:  
537           **Depletion of Abundant Sequences by Hybridization (DASH): using Cas9 to remove**  
538           **unwanted high-abundance species in sequencing libraries and molecular counting**  
539           **applications.** *Genome Biol* 2016, **17**:1-13.
- 540    30.    Wu J, Huang B, Chen H, Yin Q, Liu Y, Xiang Y, Zhang B, Liu B, Wang Q, Xia W, et al:  
541           **The landscape of accessible chromatin in mammalian preimplantation embryos.** *Nature*  
542           2016, **534**:652-657.
- 543    31.    Hardigan AA, Roberts BS, Moore DE, Ramaker RC, Jones AL, Myers RM:  
544           **CRISPR/Cas9-targeted removal of unwanted sequences from small-RNA sequencing**  
545           **libraries.** *Nucleic Acids Res* 2019, **47**:e84.
- 546    32.    Prezza G, Heckel T, Dietrich S, Homberger C, Westermann AJ, Vogel J: **Improved**  
547           **bacterial RNA-seq by Cas9-based depletion of ribosomal RNA reads.** *RNA* 2020,  
548           **26**:1069-1078.
- 549    33.    Loi DSC, Yu L, Wu AR: **Effective ribosomal RNA depletion for single-cell total RNA-seq**  
550           **by scDASH.** *PeerJ* 2021, **9**:e10717.

- 551 34. Su YH, Li YC, Guo R, Zhao JJ, Chi WR, Lai HY, Wang J, Wang Z, Li L, Sang YT, et al:  
552 **Plasma extracellular vesicle long RNA profiles in the diagnosis and prediction of**  
553 **treatment response for breast cancer.** *Npj Breast Cancer* 2021, 7:1-10.
- 554 35. Toden S, Zhuang JL, Acosta AD, Karns AP, Salathia NS, Brewer JB, Wilcock DM, Aballi  
555 J, Nerenberg M, Quake SR, Ibarra A: **Noninvasive characterization of Alzheimer's**  
556 **disease by circulating, cell-free messenger RNA next-generation sequencing.** *Science*  
557 *Advances* 2020, 6:1654.
- 558 36. He YD, Tao W, He T, Wang BY, Tang XM, Zhang LM, Wu ZQ, Deng WM, Zhang LX,  
559 Shao CK, et al: **A urine extracellular vesicle circRNA classifier for detection of high-grade**  
560 **prostate cancer in patients with prostate-specific antigen 2-10 ng/mL at initial biopsy.**  
561 *Molecular Cancer* 2021, 20:1-6.
- 562 37. Nabet BY, Qiu Y, Shabason JE, Wu TJ, Yoon T, Kim BC, Benci JL, DeMichele AM,  
563 Tchou J, Marcotrigiano J, Minn AJ: **Exosome RNA Unshielding Couples Stromal**  
564 **Activation to Pattern Recognition Receptor Signaling in Cancer.** *Cell* 2017, 170:352-366.
- 565 38. Salmen F, De Jonghe J, Kaminski TS, Alemany A, Parada GE, Verity-Legg J, Yanagida  
566 A, Kohler TN, Battich N, van den Brekel F, et al: **High-throughput total RNA sequencing**  
567 **in single cells using VASA-seq.** *Nature Biotechnology* 2022.
- 568 39. Isakova A, Neff N, Quake SR: **Single-cell quantification of a broad RNA spectrum reveals**  
569 **unique noncoding patterns associated with cell types and states.** *Proceedings of the*  
570 *National Academy of Sciences of the United States of America* 2021, 118.

571

572

## 573 **Figure Legends**

574

### 575 **Figure 1 | Depletion-assisted multiplexing cell-free total RNA sequencing.**

576 **(A)** Bioanalyzer trace of cfRNA fragment lengths in a human plasma sample. **(B)** The relative  
577 proportion of reads for various RNA biotypes detected by total RNA sequencing averaged by  
578 three human plasma samples. **(C)** Distribution of reads' insert size for the fragmented rRNAs  
579 and mtRNAs, derived from the above sequencing data. **(D)** Distribution of reads' coverage.  
580 Blue bars on top represent sgRNA target sites. **(E)** The designed sgRNAs tiling the  
581 fragmented rRNA and mtRNA sequences. **(F)** Schematic overview of DETECTOR-seq  
582 workflow. First, cfRNAs are reverse transcribed with random primers and TSO. Sample  
583 barcodes and UMIs are introduced during this step. Second, after calibrating input amounts,  
584 samples are pooled and pre-amplified. Third, cDNAs of rRNAs and mtRNAs are depleted by  
585 CRISPR-Cas9. Subsequently, DETECTOR-seq library is further amplified, then sequenced  
586 on an Illumina platform. rRNA: ribosomal RNA; mtRNA: mitochondrial RNA; TSO: template  
587 switching oligo; UMI: unique molecular identifier.

588

### 589 **Figure 2 | Efficient and specific depletion of rRNA and mtRNA sequences.**

590 **(A)** The read distributions and **(B)** coverages of untreated and rRNA/mtRNA-depleted  
591 DETECTOR-seq libraries. Read coverage was normalized to total mapped reads. Pearson  
592 correlation of cfRNA expression levels between **(C)** untreated and rRNA/mtRNA-depleted  
593 DETECTOR-seq libraries, and **(D)** DETECTOR-seq versus SMARTer-seq. TPM: transcripts

594 per million mapped reads (rRNA/mtRNA reads were removed).

595

596 **Figure 3 | Analytical validation analysis of DETECTOR-seq's performance.**

597 **(A)** Number of sequenced reads of each barcoded sample in each multiplexing library. The  
598 dashed line represents an expected number. **(B)** The number of collapsed reads with PCR  
599 duplicates removed by UMI or non-UMI methods. \*\*\*\*:  $P$ -value<0.0001, Wilcoxon rank sum  
600 test, two-tailed. **(C)** Average coverage across all the 5' and 3' exon boundary sites  
601 flanking upstream and downstream by 50 bp. **(D)** The number of detected genes in  
602 DETECTOR-seq libraries (n=5) with different input volumes of plasma. **(E)** Pearson  
603 correlation matrix of plasma samples from biological triplicates (N1–N3) and technical  
604 triplicates (R1–R3). **(F)** Pearson correlation between spike-in molecules and their reads  
605 sequenced by DETECTOR-seq for ERCC spike-in controls. **(G)** Numbers of detected UMIs  
606 and **(H)** detected genes (defined by three different minimum counts) at various subsampled  
607 genome-aligned read depths. The error bar represents the standard deviation of multiple  
608 samples (n=24). M: million.

609

610 **Figure 4 | Comparing DETECTOR-seq with other cfRNA-seq methods.**

611 **(A)** Average percentages of genome-aligned reads mapping to exonic, intronic, and  
612 intergenic regions for four different cfRNA-seq methods. **(B)** Average coverage across all  
613 mRNAs' 5' and 3' exon boundary sites flanking upstream and downstream by 50 bp. **(C)**  
614 Average percentages of reads located in the sense and antisense strands of mRNAs' exons,

615 introns, and promoters. **(D)** Average percentages of clean reads (after trimming low-quality  
616 and adapter sequences) assigned to different sources. **(E)** Numbers of raw sequencing  
617 reads and human genome-aligned reads with a fixed budget of \$300 for each method. **(F)**  
618 Summary of key techniques used in the four cfRNA-seq approaches. Numbers of used  
619 samples: Phospho-seq: 15; SILVER-seq: 128; SMARTer-seq: 373; DETECTOR-seq: 113.

620

621 **Figure 5 | Distinct human and microbial RNA signatures in *Plasma* versus *EV*.**

622 **(A)** Illustration of sequencing *Plasma* cfRNAs and *EV* cfRNAs in pairwise plasma samples.  
623 **(B)** Distribution of reads mapped to human genome and microbiome in *Plasma* and *EV*  
624 cfRNA datasets. Left: RNA spectrum mapping to human genome; Right: relative abundance  
625 of reads aligned to different phyla. **(C)** Differential human RNA species between *Plasma* and  
626 *EV* cfRNAs. **(D)** Pie charts show the average fractional contributions of various cell types to  
627 the *Plasma* and *EV* transcriptomes. Box plots show the diversity of cell type contributions to  
628 the *Plasma* and *EV* transcriptomes measured by the ratio of non-blood cells and Simpson's  
629 index. **(E)** The fractions of reads aligned to microbe and virus. **(F)** Differential microbe genera  
630 between *Plasma* and *EV* cfRNAs. *Plasma*: 44 samples; *EV*: 44 samples (all samples paired).  
631 \*\*\*\*:  $P$ -value < 0.0001, \*\*:  $P$ -value < 0.01, \*:  $P$ -value < 0.05, Wilcoxon rank sum test, two-  
632 tailed.

633

634 **Figure 6 | Distinct functional pathways, motifs, and binding proteins of the selective**  
635 ***Plasma* and *EV* cfRNAs.**

636 **(A)** Definition of the selective cfRNAs enriched in *Plasma* or *EV*. Cutoff:  $|\text{Fold-change}| > 1$  and  
637  $\text{FDR} < 0.1$ . **(B)** Top enriched KEGG pathways of the selective cfRNAs. **(C)** Top enriched  
638 motifs and their corresponding RNA binding proteins (RBPs) of the selective cfRNAs.  
639 *Plasma*: 44 samples; *EV*: 44 samples (all samples paired).

640

641 **Figure 7 | Cancer classification using *Plasma* cfRNAs and *EV* cfRNAs.**

642 **(A)** Cancer-relevant ones (differentially expressed between cancer patients and normal  
643 controls,  $|\log_2\text{fold-change}| > 1$  and  $\text{FDR} < 0.05$ ) in the selective and non-selective human  
644 cfRNAs. Cancer: colorectal cancer (CRC) and lung cancer (LC); NC: normal control. **(B)**  
645 Enriched GO terms related to cancer-relevant human cfRNAs. Performances (average of 20  
646 bootstrap procedures) of cancer-relevant human cfRNAs distinguishing cancer patients from  
647 normal controls when excluding **(C)** and including **(D)** non-selective cfRNAs. **(E)** AUROCs of  
648 cancer type classification (CRC vs. LC) using human- or microbe-derived reads in *Plasma*  
649 and *EV* cfRNAs. **(F)** Numbers of microbial features (genus) with significantly differential  
650 abundance ( $|\log_2\text{fold-change}| > 1$  and  $\text{FDR} < 0.1$ ) between CRC and LC in 20 bootstrap  
651 procedures. **(G)** Distinct cancer type-specific microbial features (genus) identified in *Plasma*  
652 and *EV* cfRNAs. Heatmaps show z-scores of the abundance levels of these microbial RNA  
653 features; bar plots illustrate their average  $\log_2\text{FCs}$  and FDRs between CRC and LC. FC: fold-  
654 change; FDR: false discovery rate. \*\*\*\*:  $P\text{-value} < 0.0001$ , \*\*\*:  $P\text{-value} < 0.001$ , \*:  $P\text{-value} <$   
655  $0.05$ , Wilcoxon rank sum test, two-tailed. CRC samples: *Plasma* (n=23), *EV* (n=19), 19 of  
656 them paired; LC samples: *Plasma* (n=19), *EV* (n=19), 18 of them paired; NC samples:



657 *Plasma* (n=19), *EV* (n=14), 7 of them paired.

Figure 1

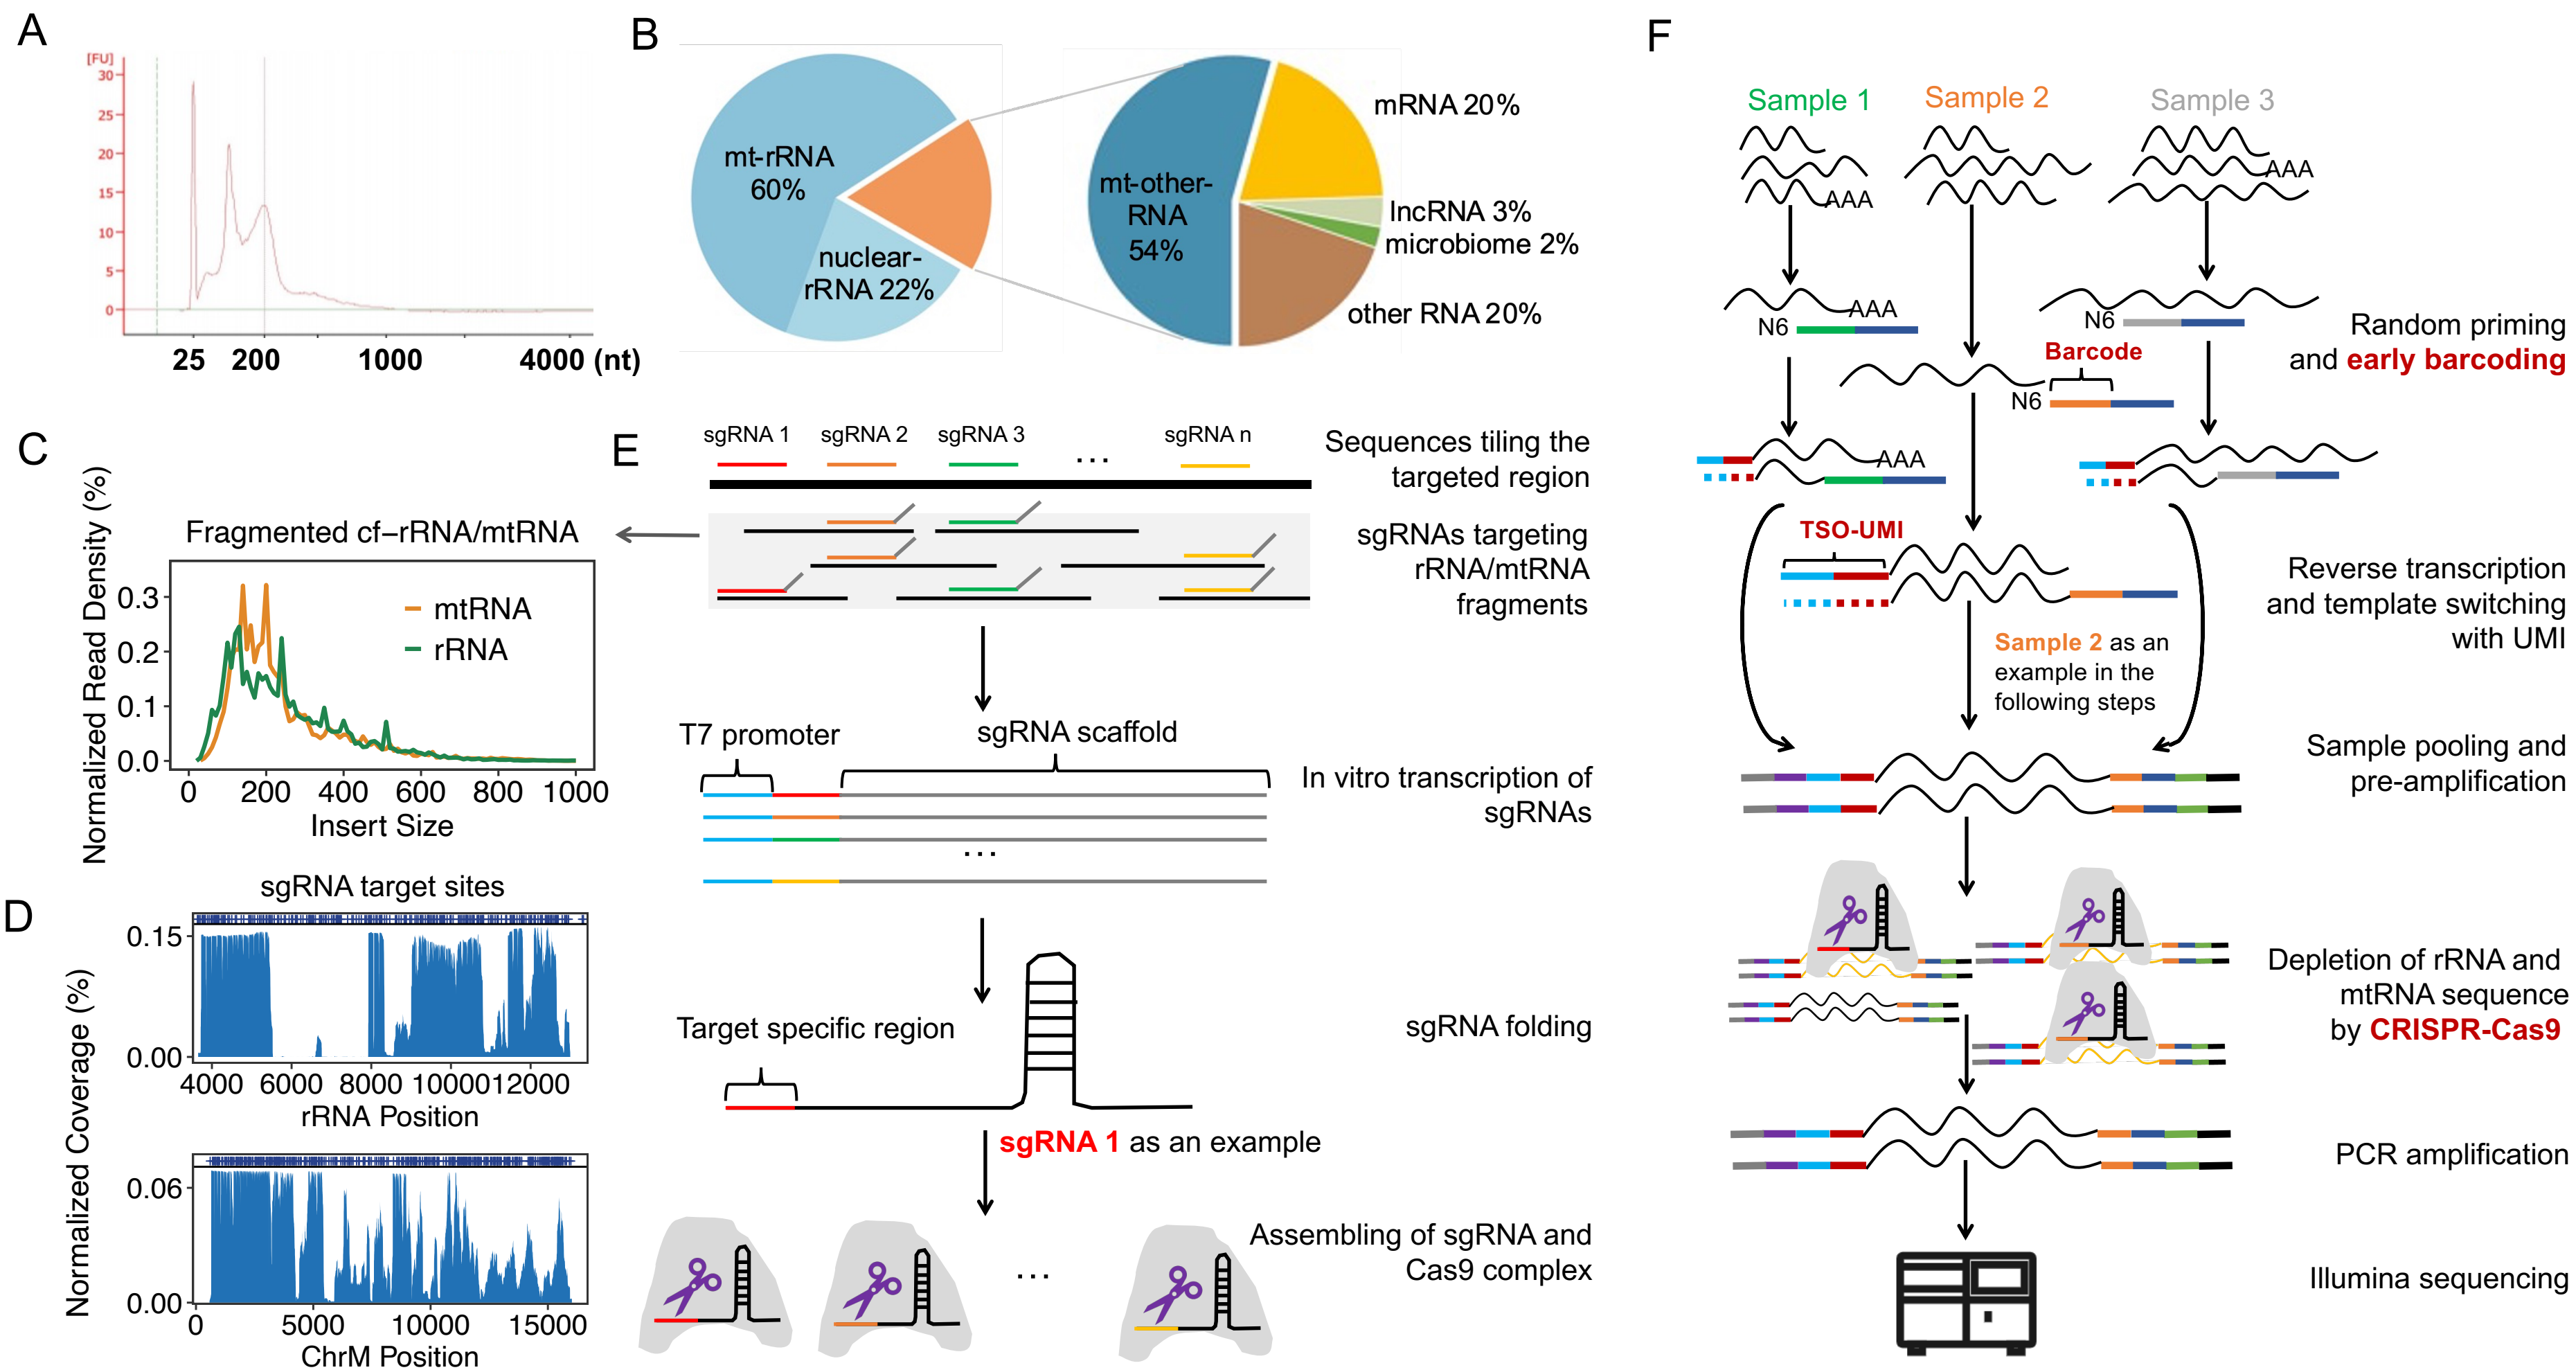

Figure 2

A

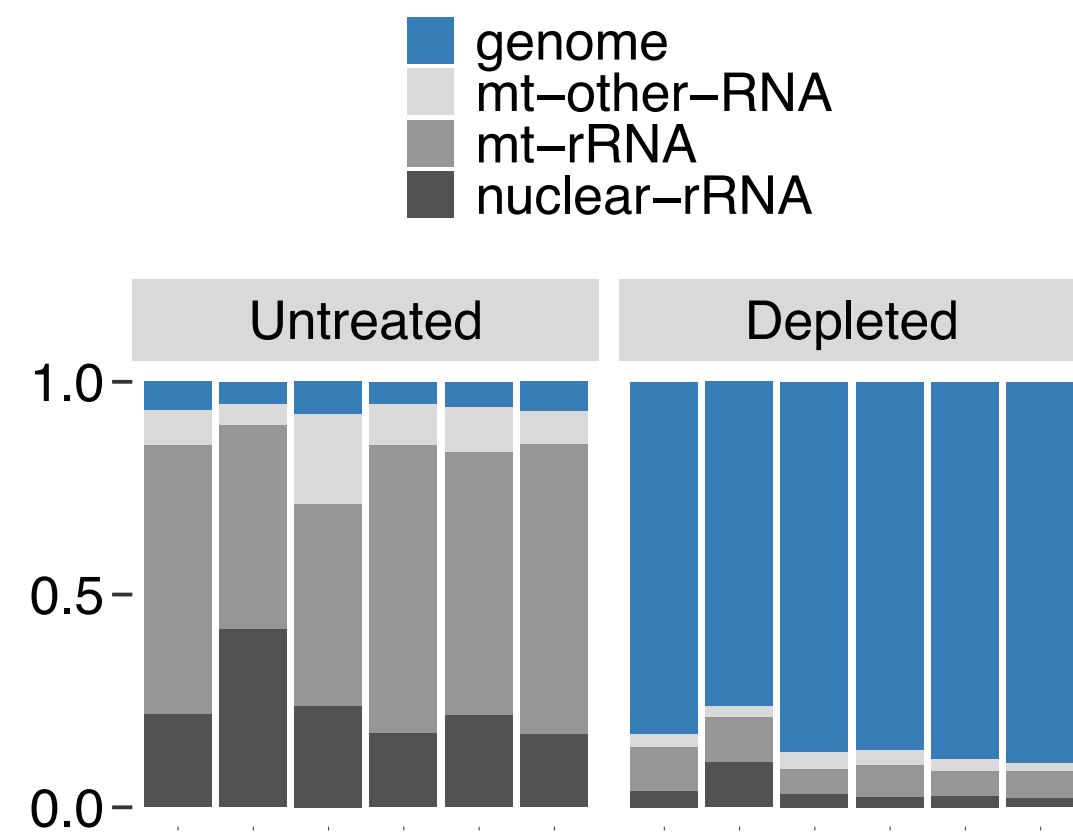

B

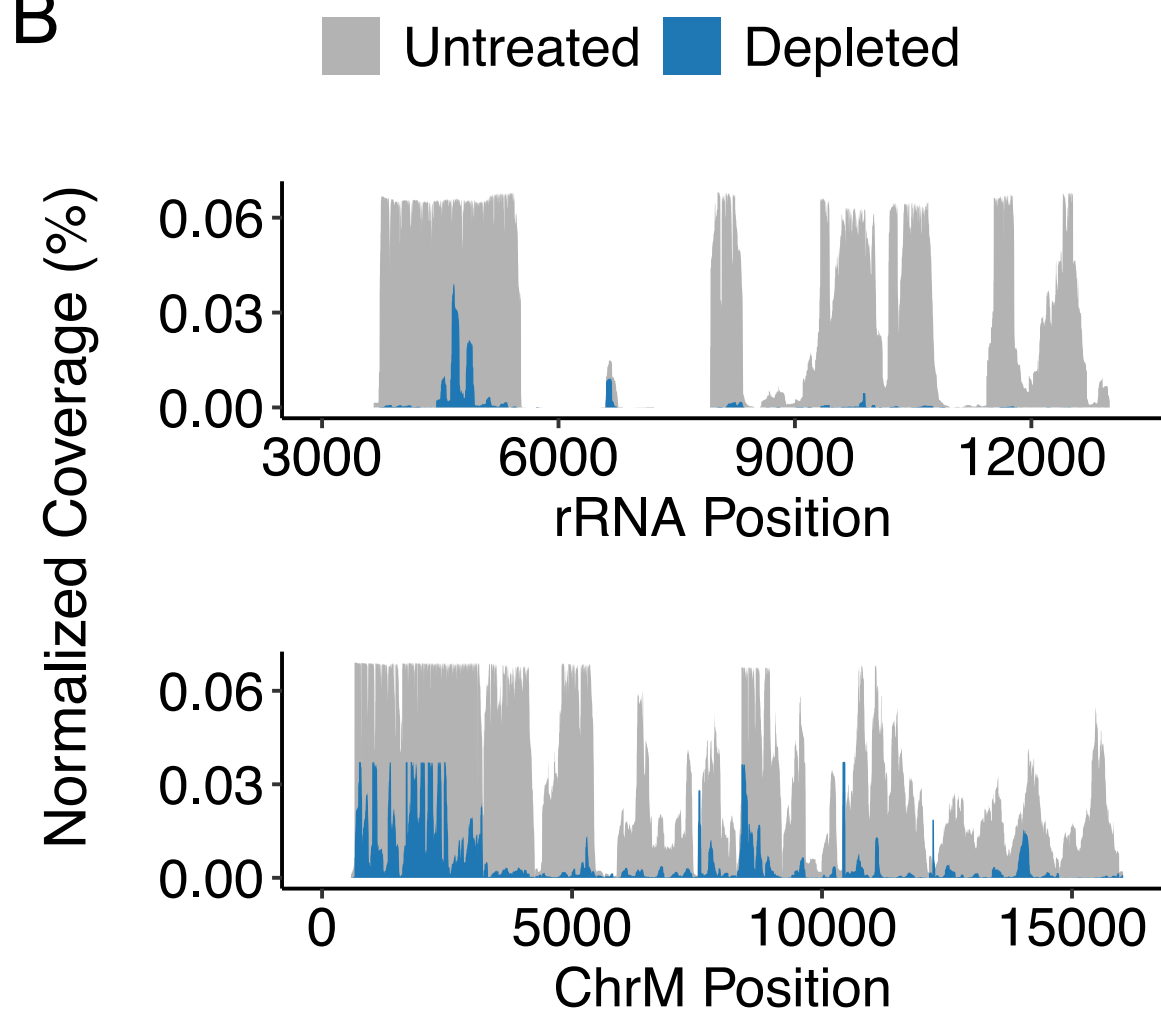

C

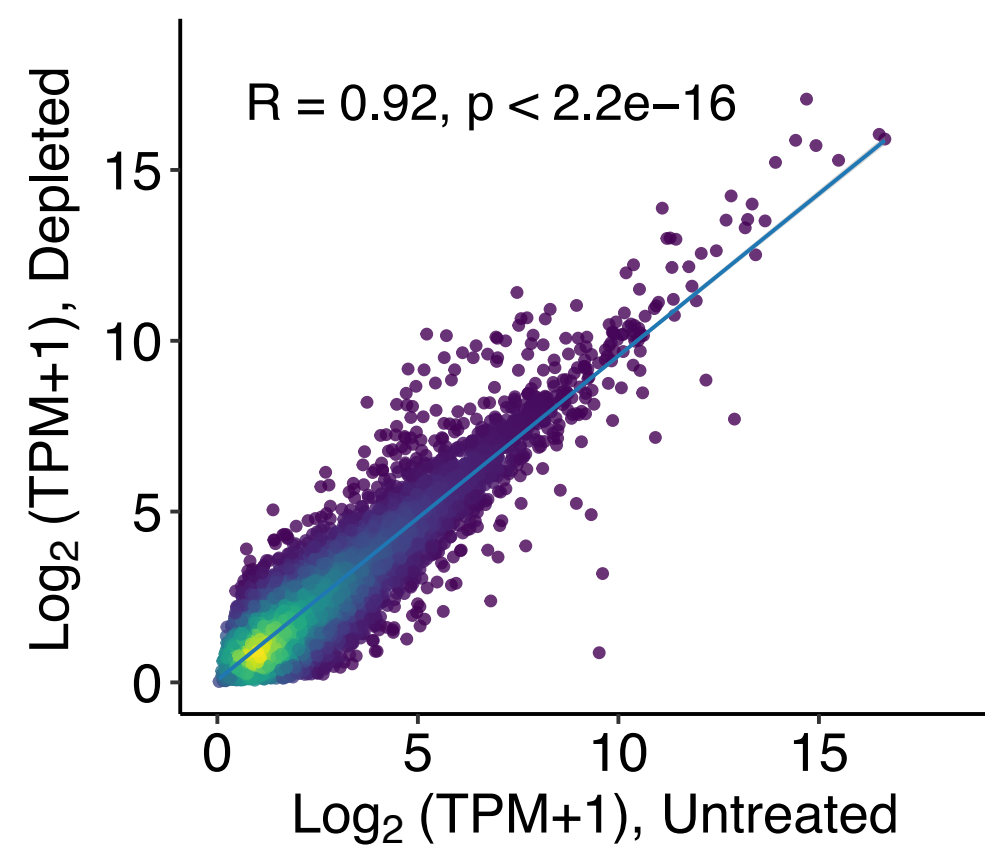

D

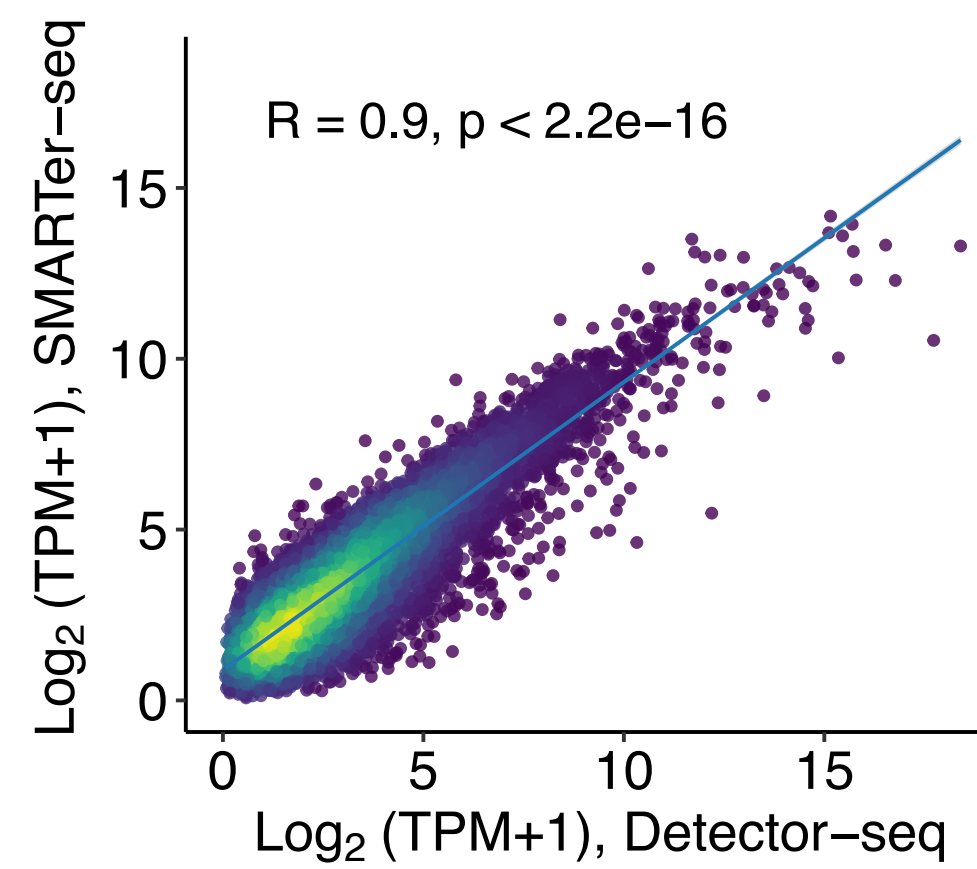

Figure 3

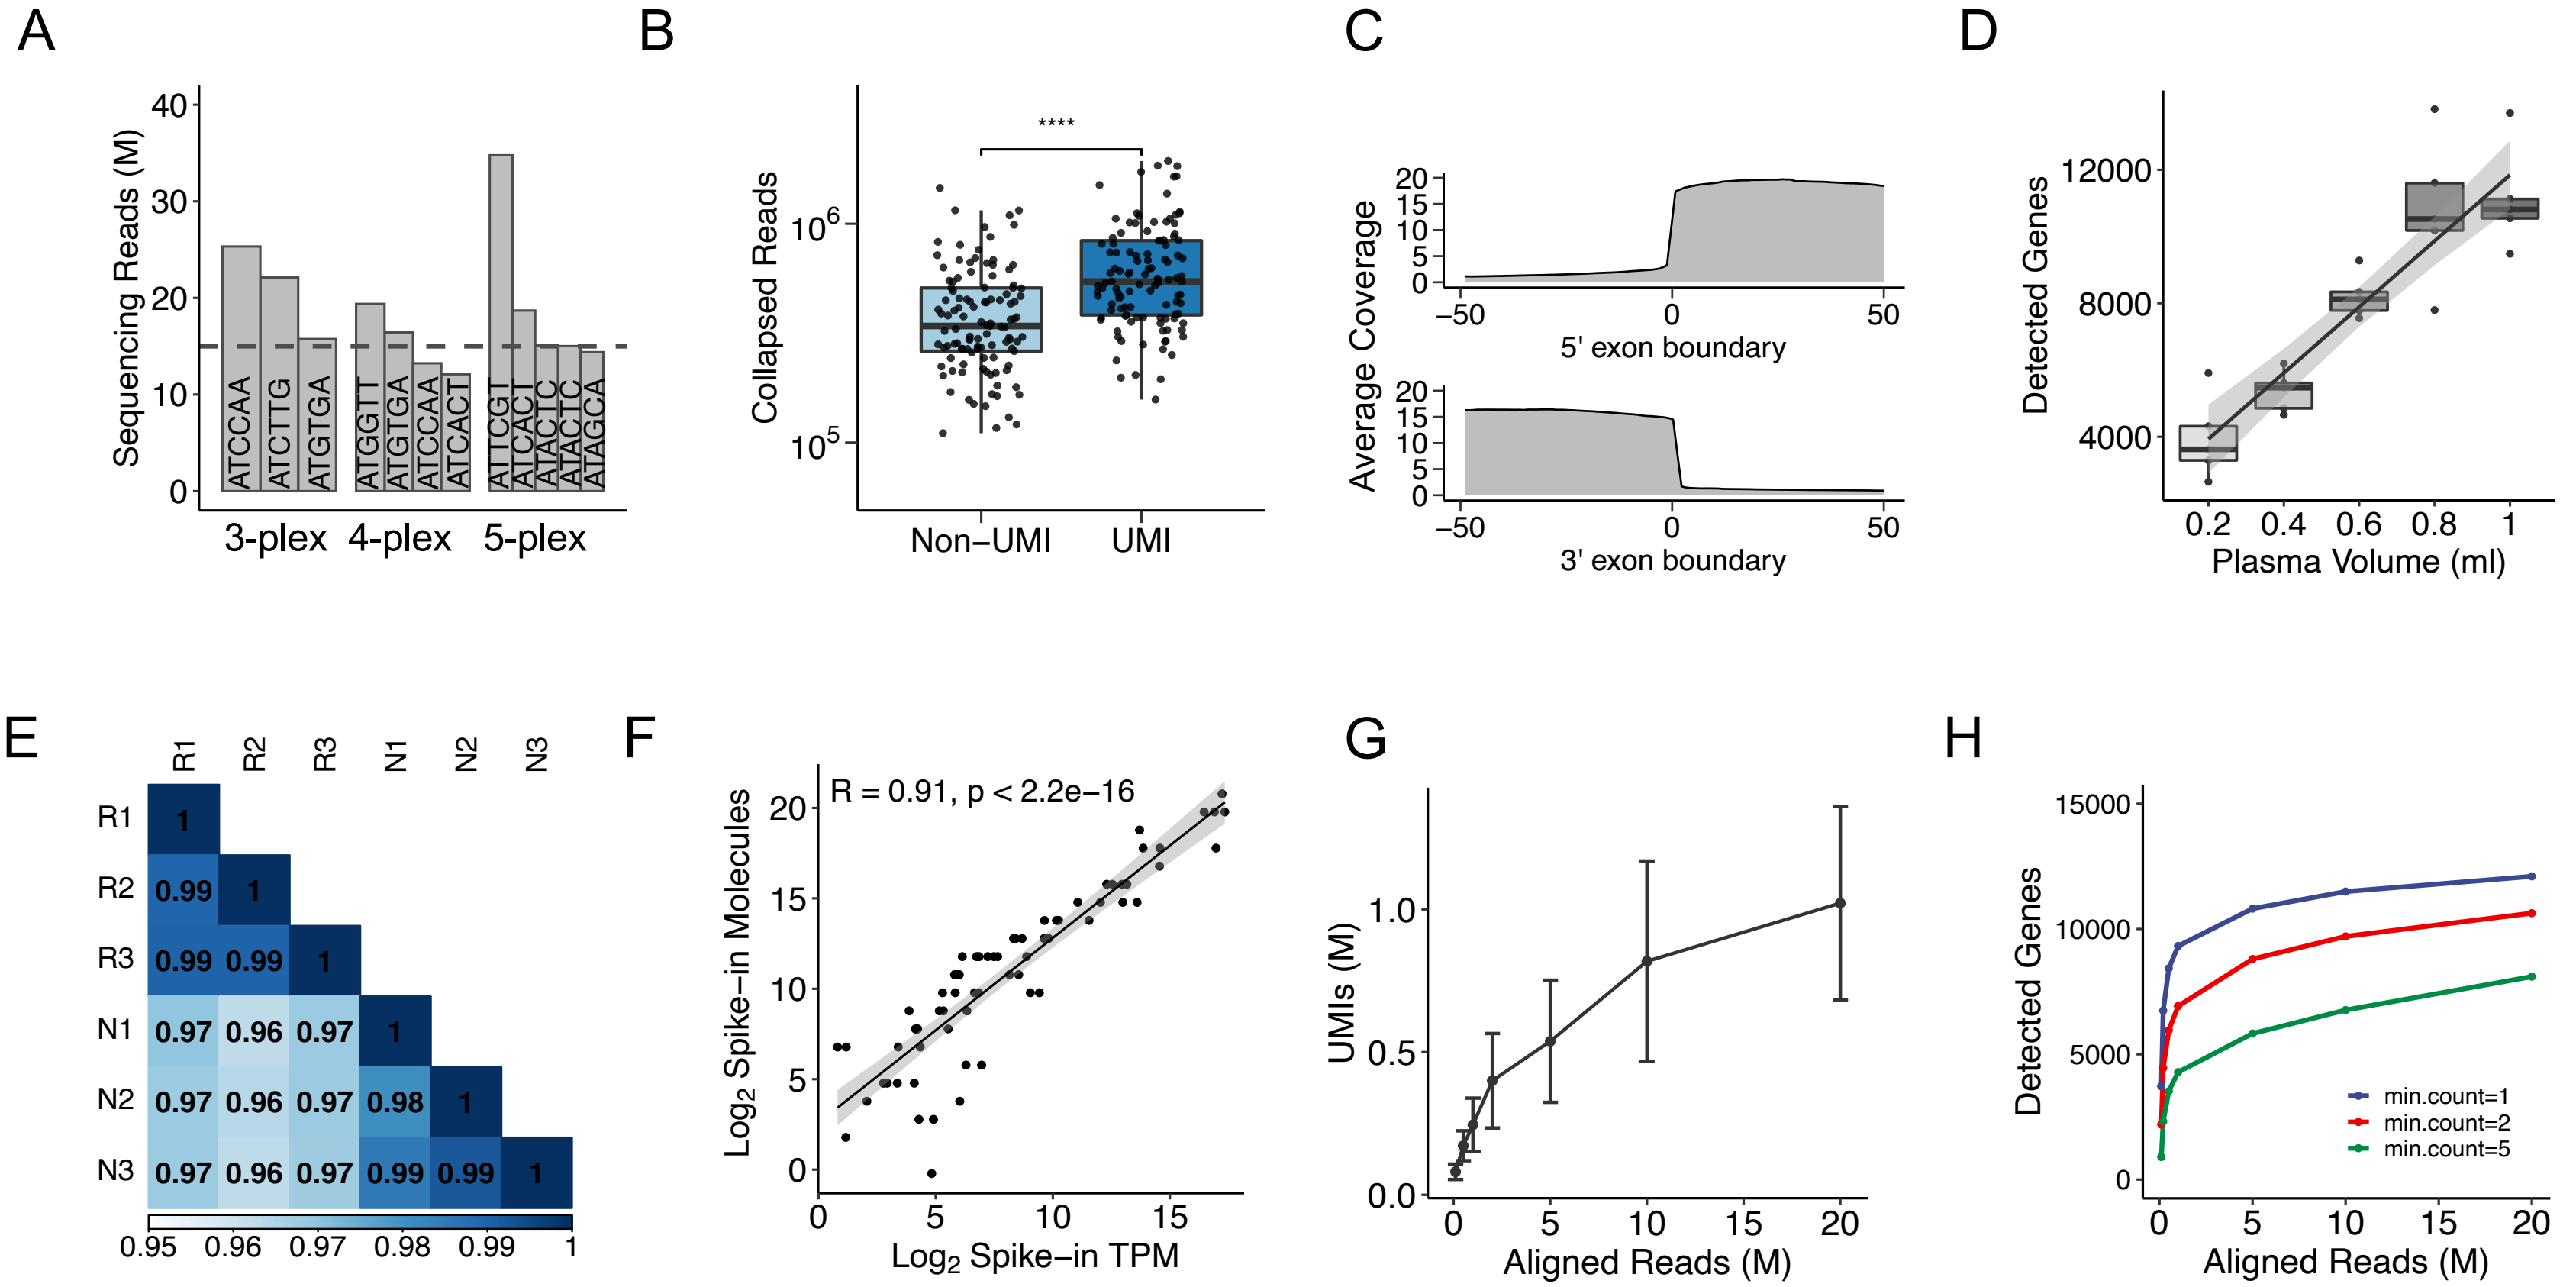

# Figure 4

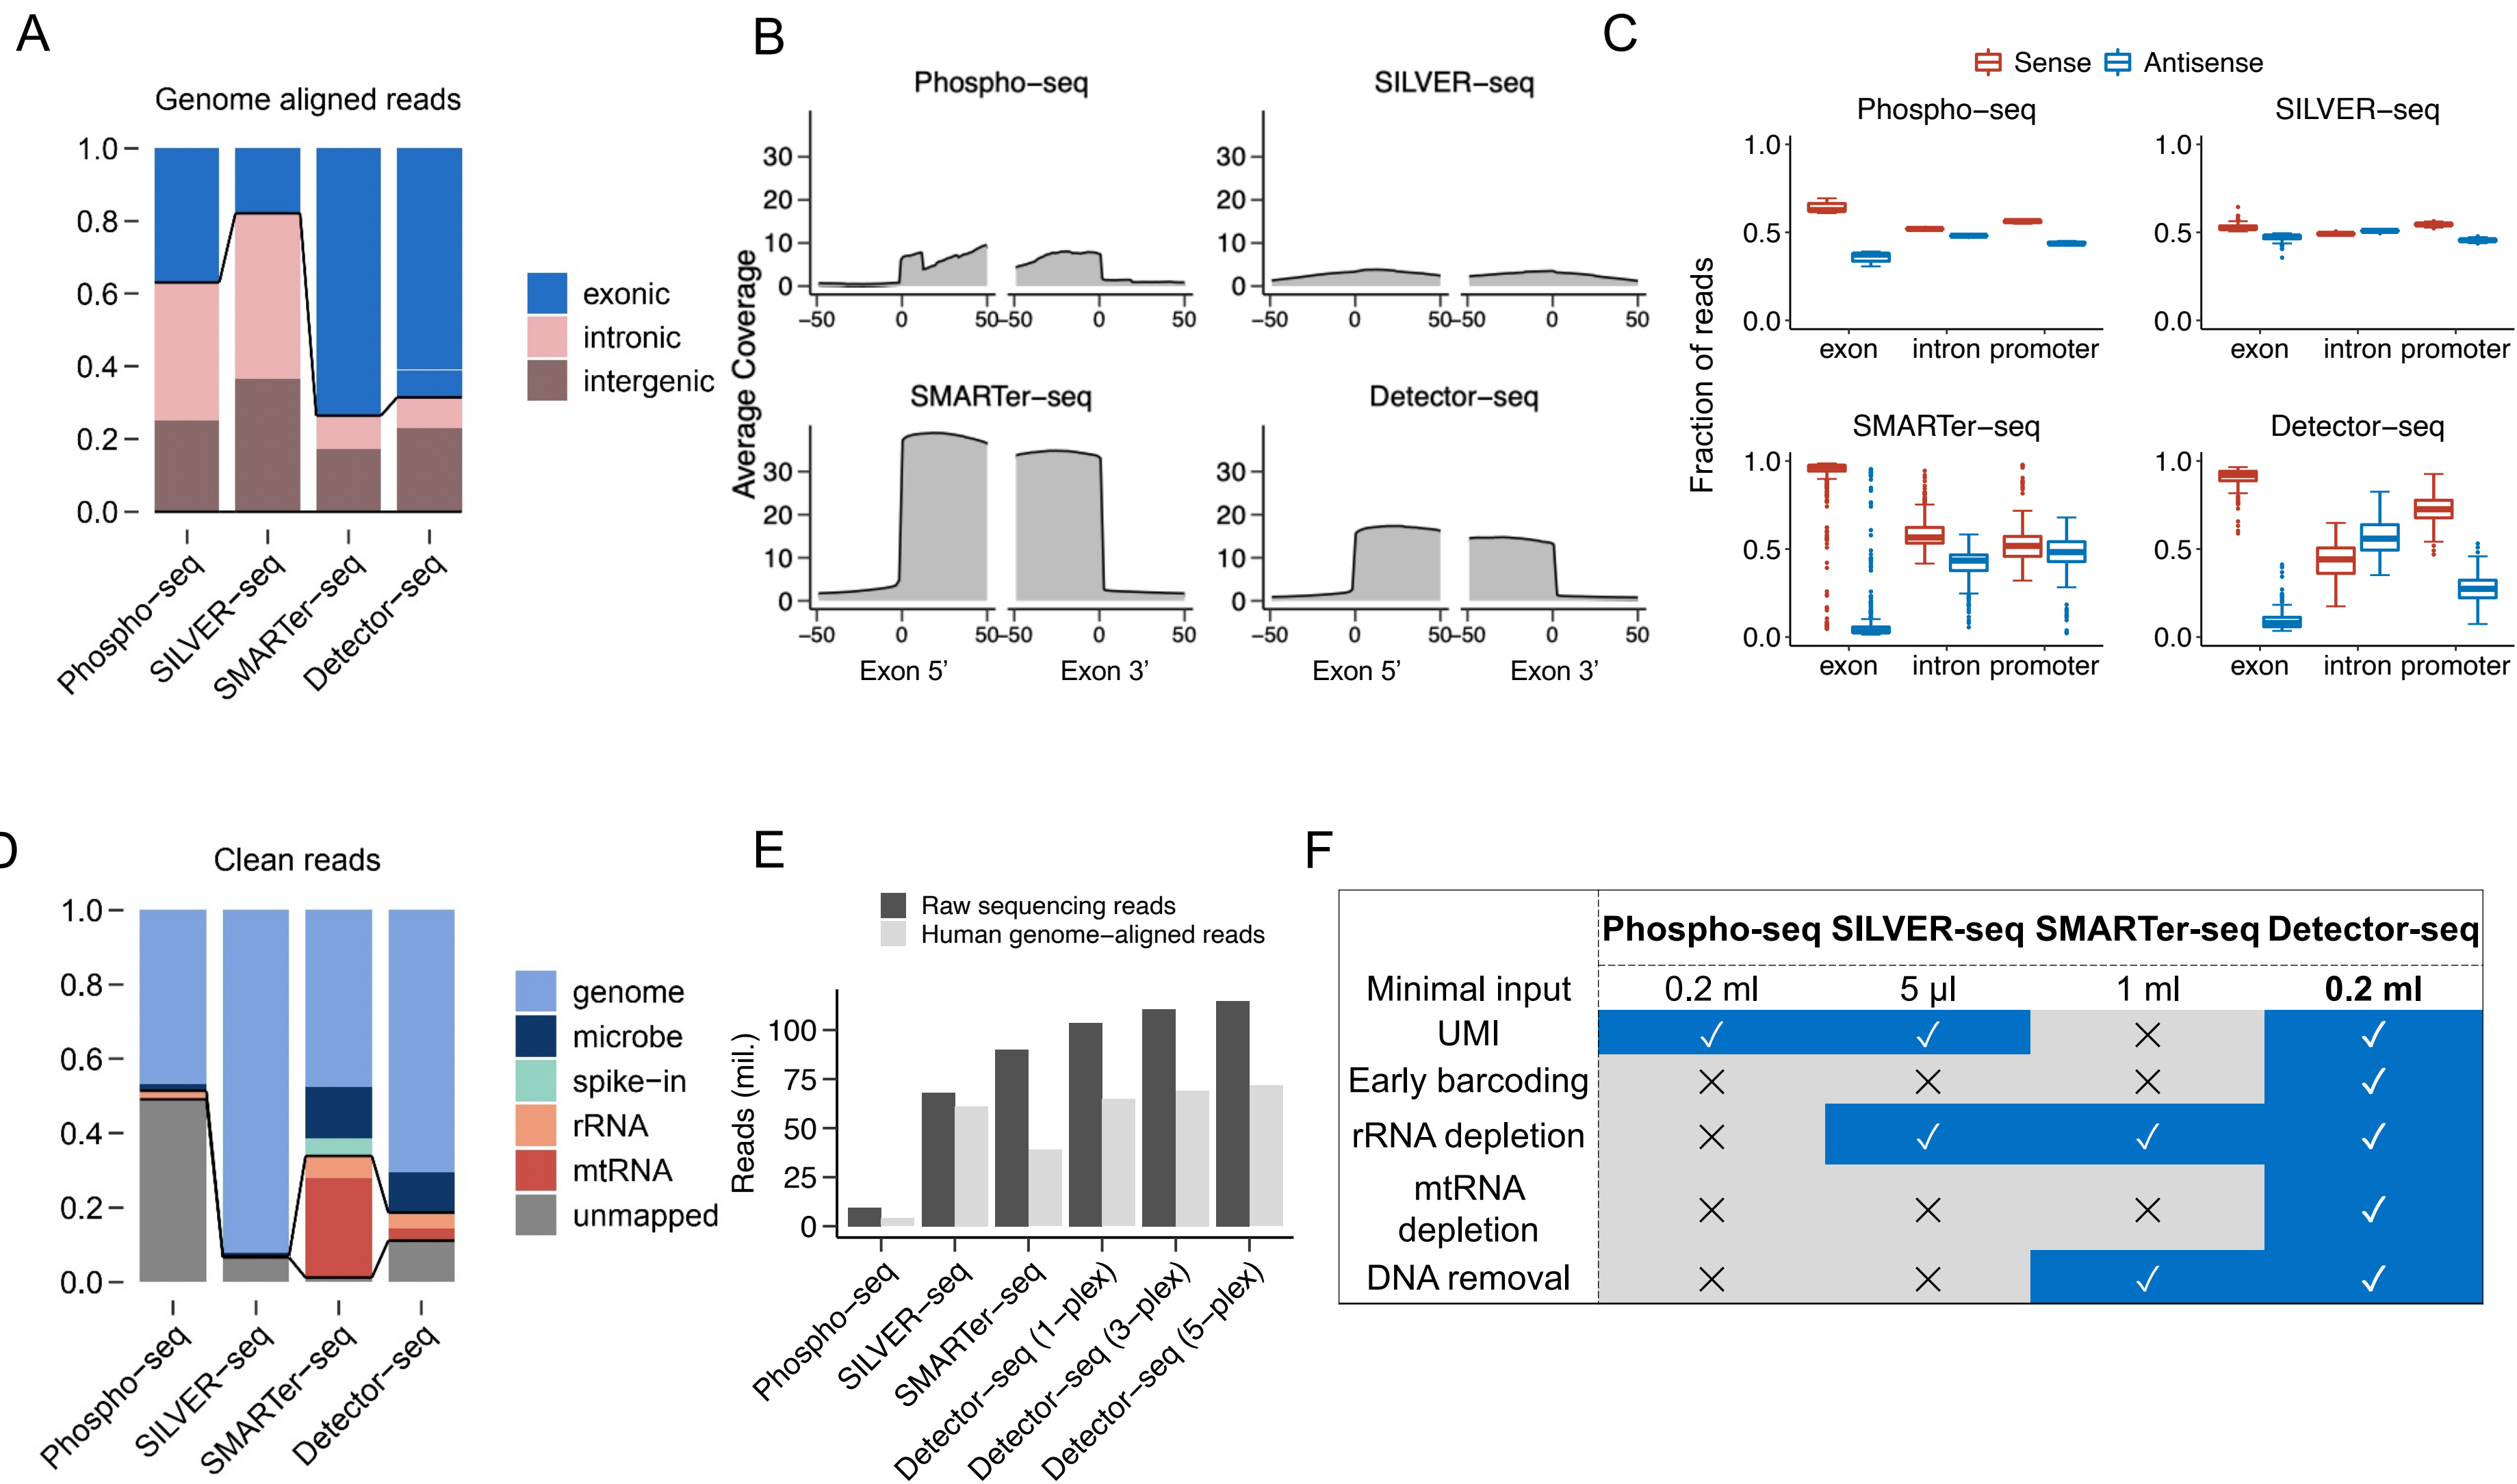

Figure 5

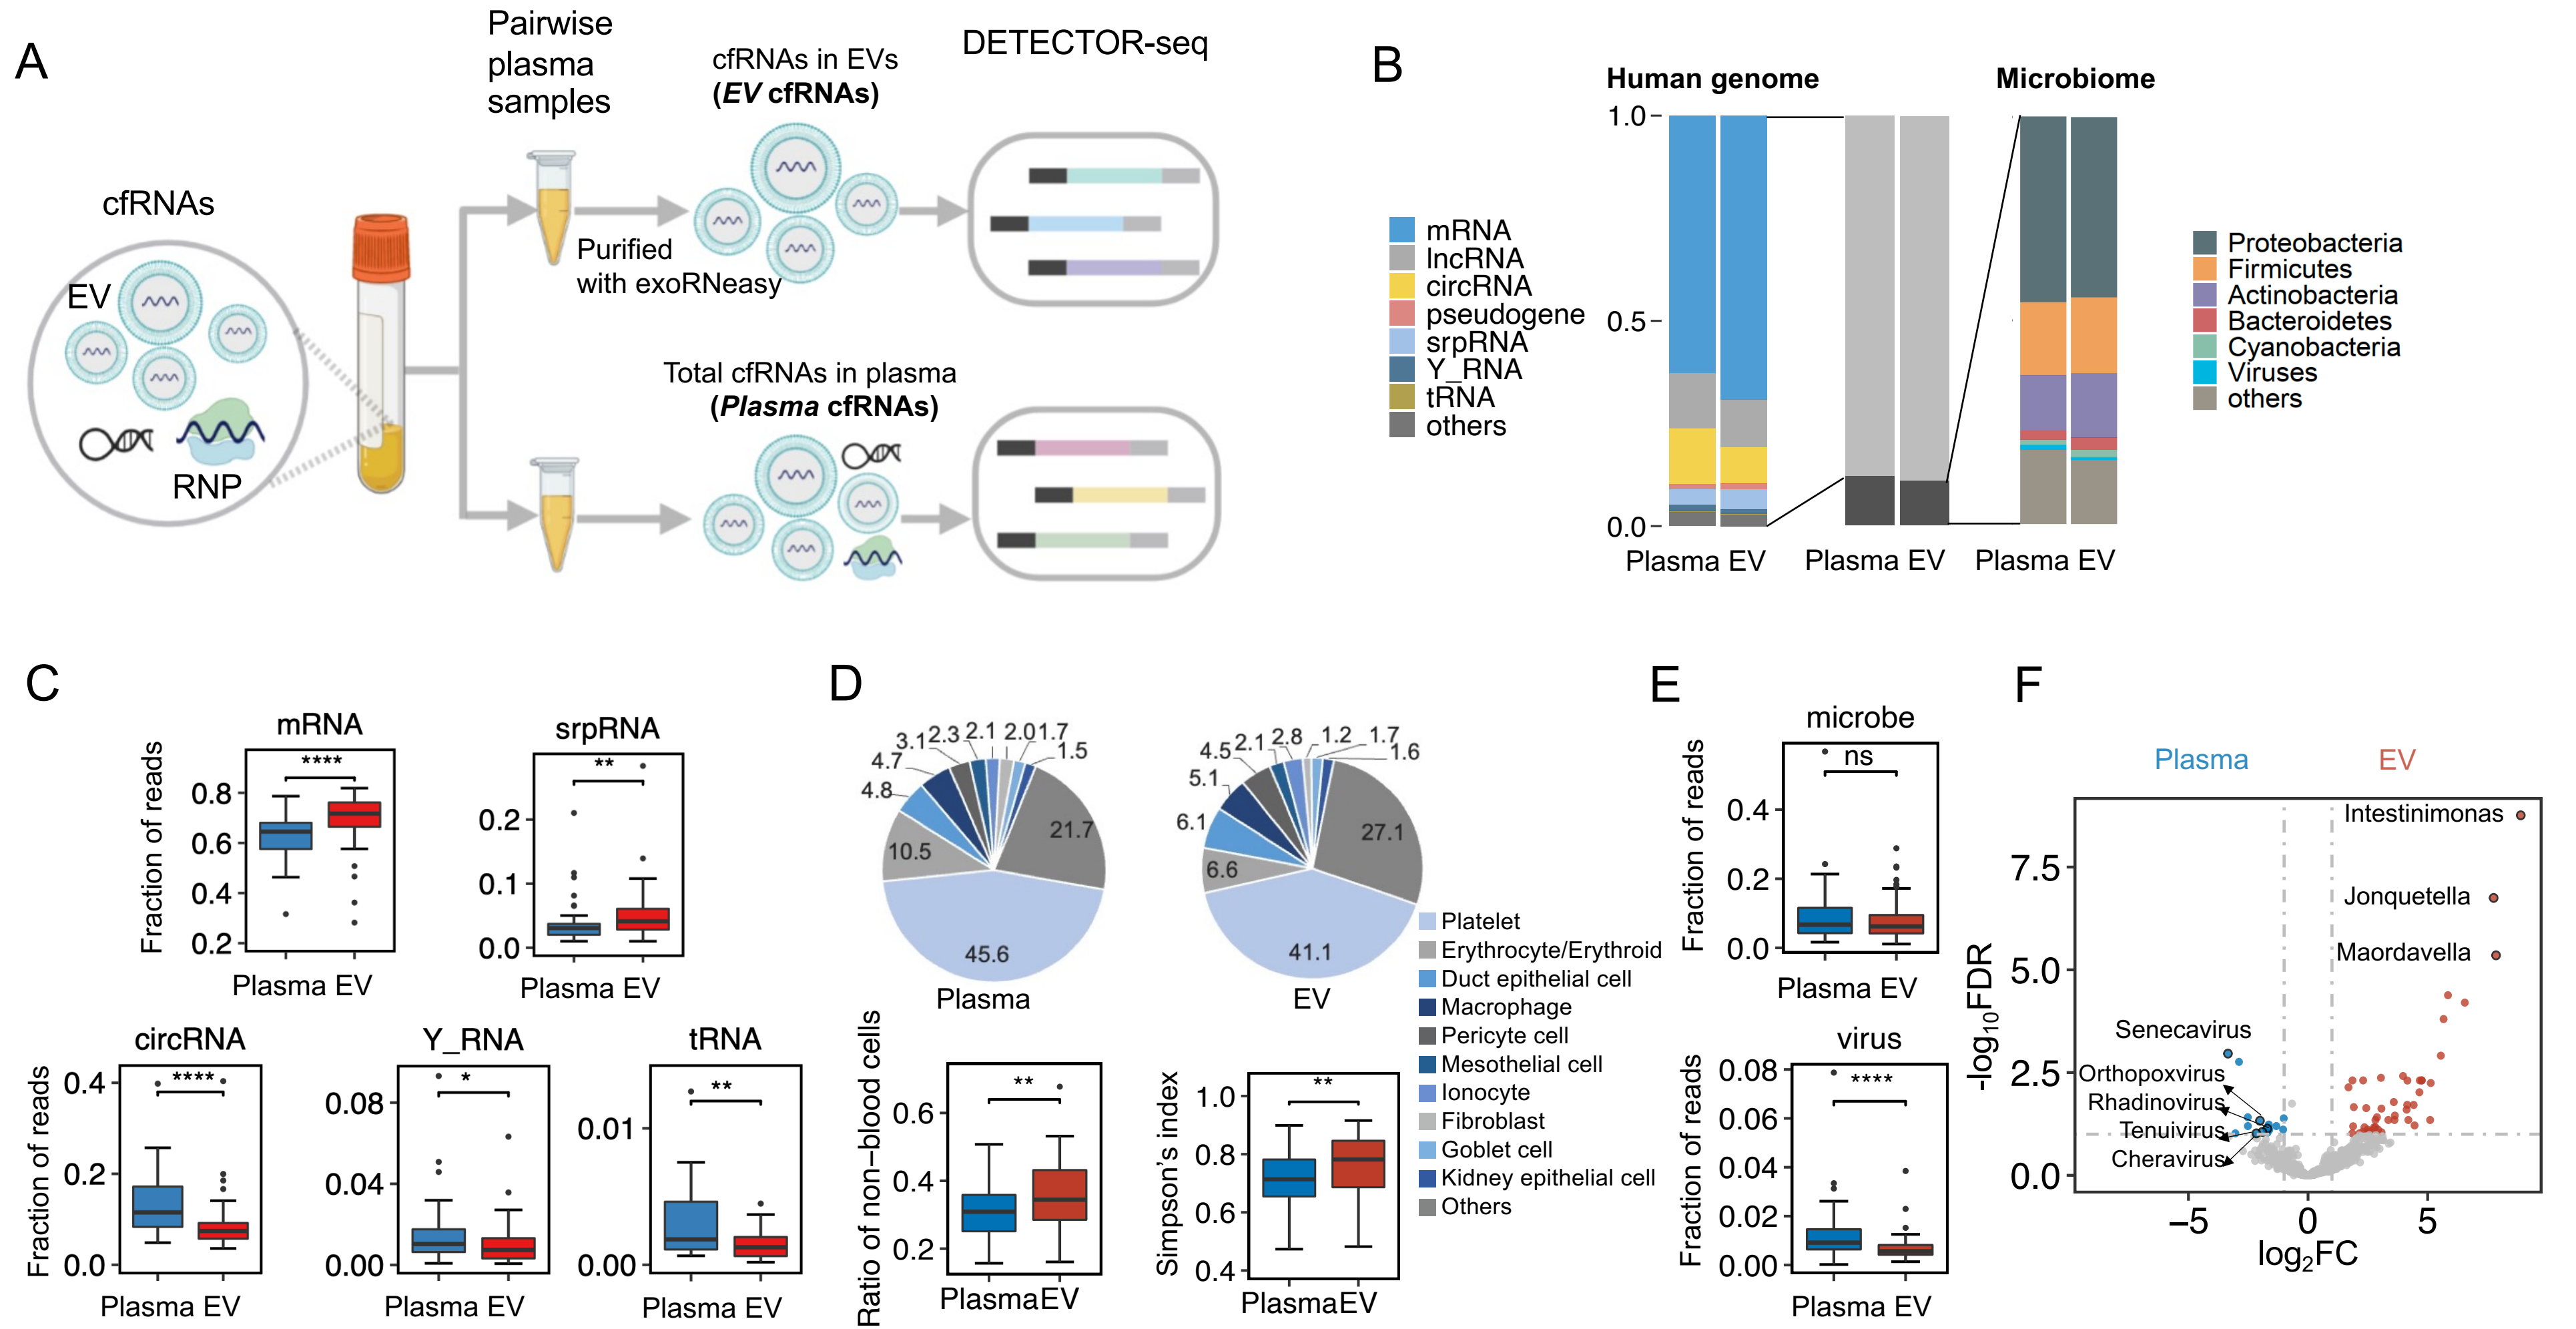

Figure 6

A

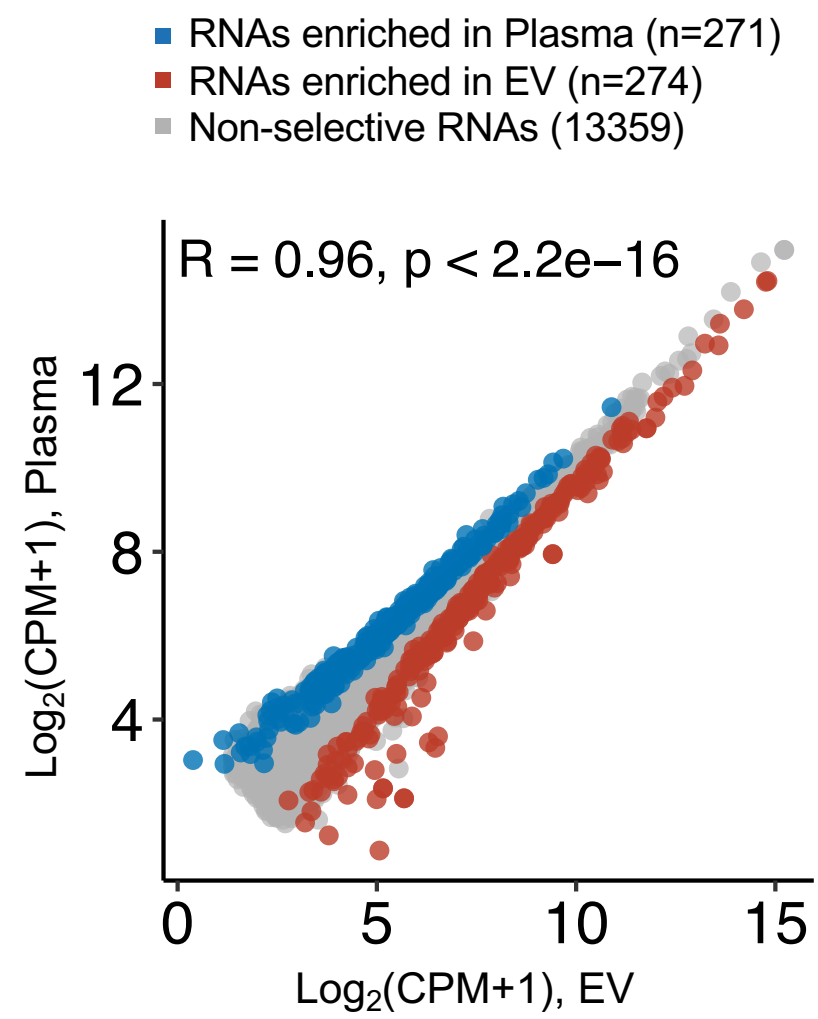

B

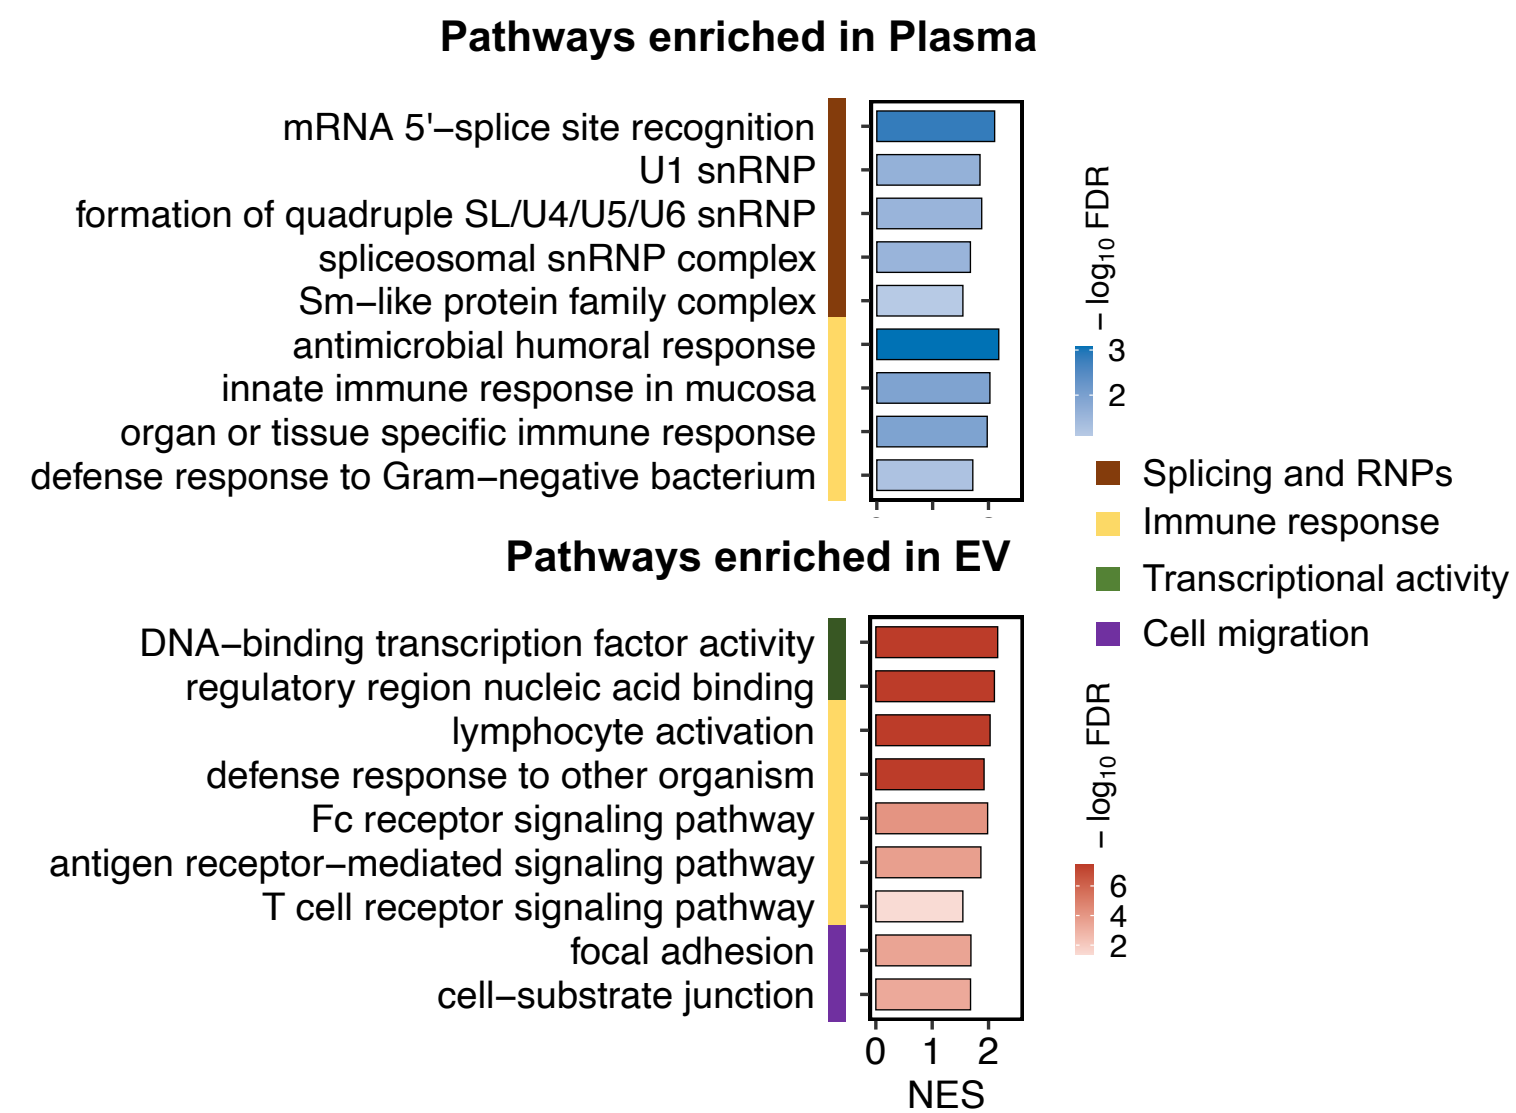

C

|                    | Motif | E-value  | RBP          | Annotation              |
|--------------------|-------|----------|--------------|-------------------------|
| Enriched in Plasma |       | 1.64E-35 | ABCF1        | innate immune           |
|                    |       | 1.46E-29 | SFPQ         | splicing factor         |
|                    |       | 2.31E-26 | LARP4        | La RNP                  |
|                    |       | 4.51E-23 | TROVE2       | Y RNA binding protein   |
|                    |       | 1.77E-20 | DKC1         | snoRNP                  |
| Enriched in EV     |       | 2.57E-61 | PUM1         | innate immune           |
|                    |       | 4.7E-57  | BCLAF1       | transcription repressor |
|                    |       | 2.4E-55  | HNRNPU       | transcription regulator |
|                    |       | 9.47E-55 | PCBP1        | immune checkpoint       |
|                    |       | 1.12E-51 | APOBEC3<br>C | RNA editing             |

Figure 7

A

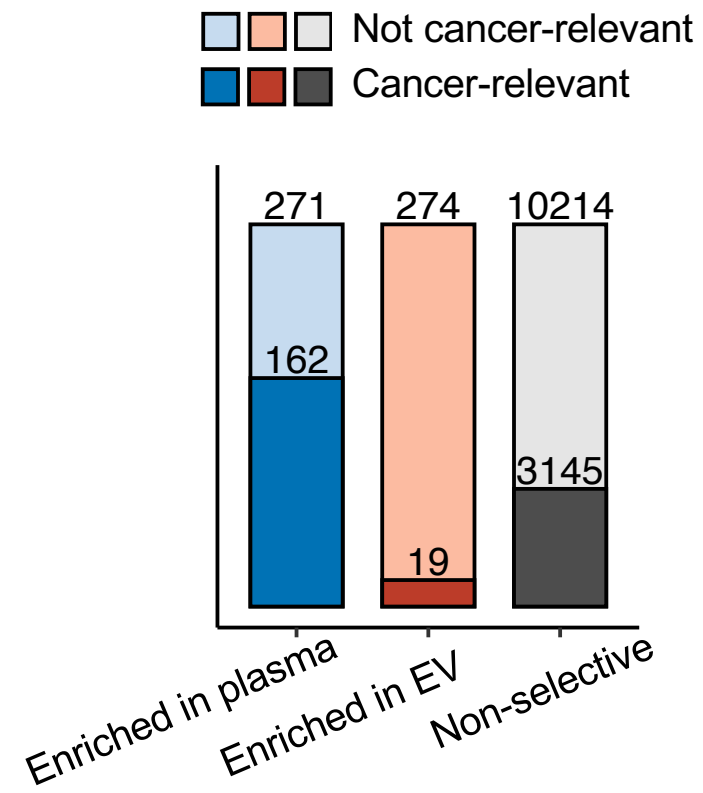

B

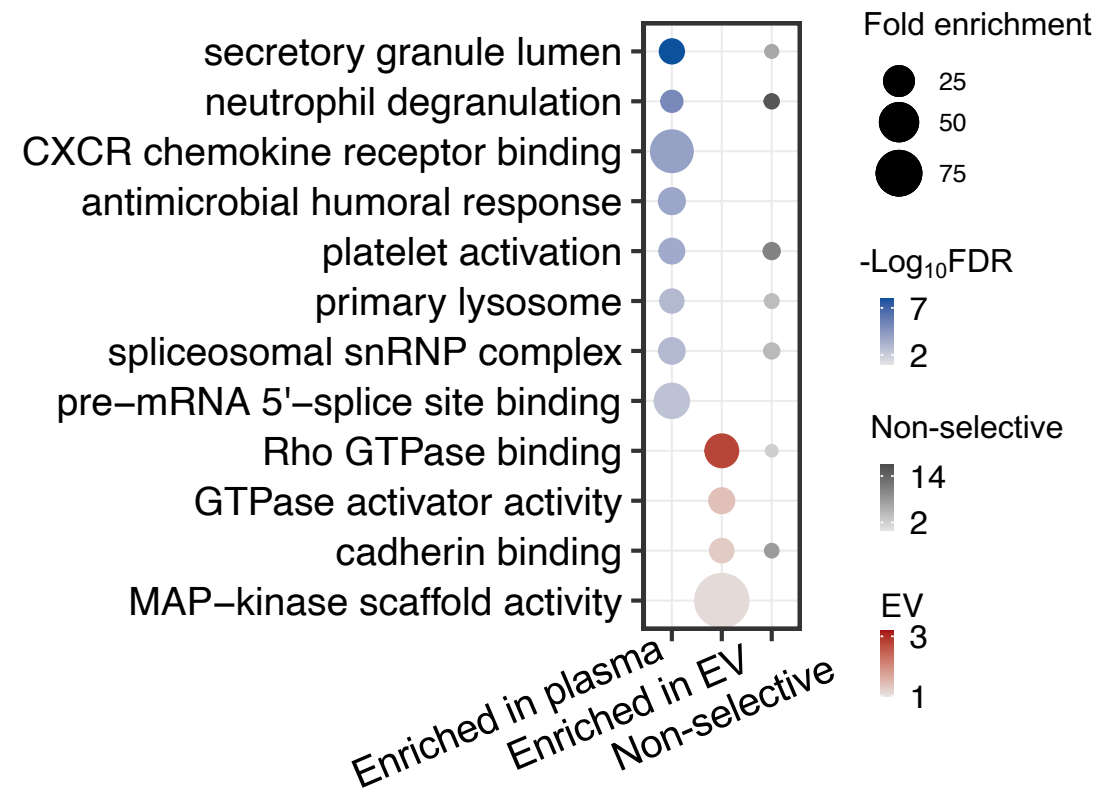

C

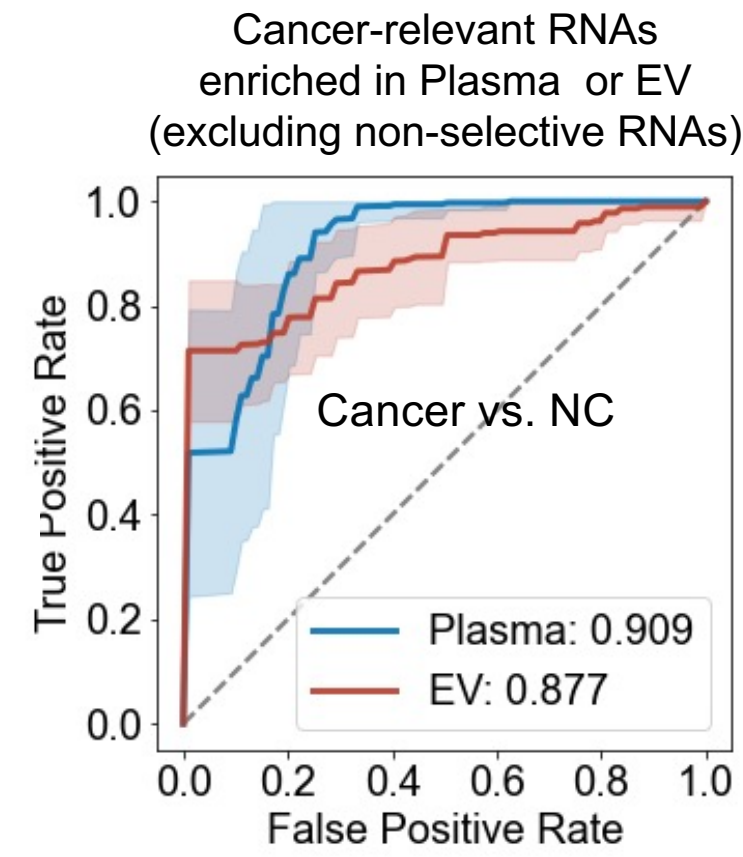

D

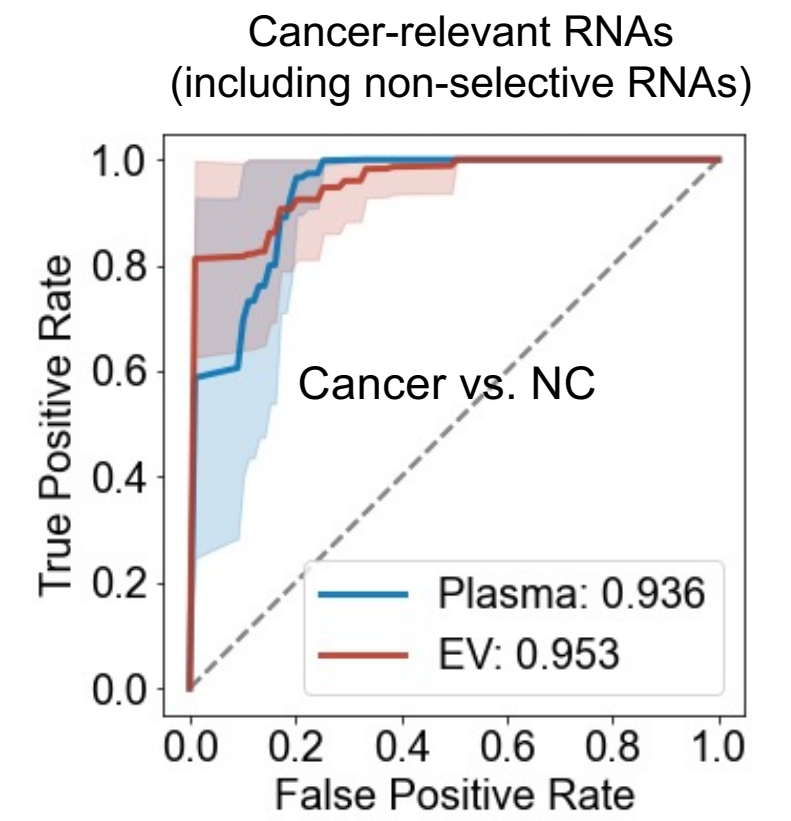

E

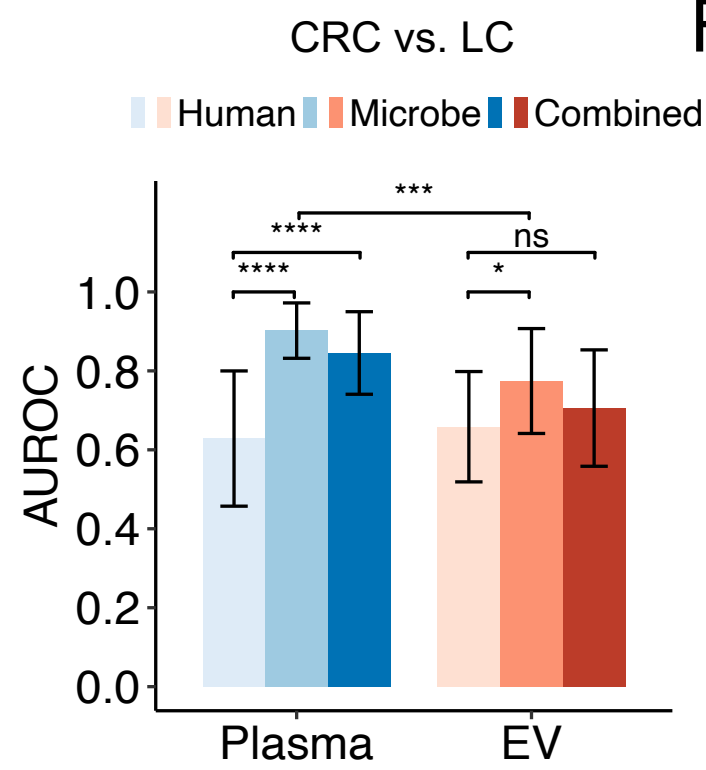

F

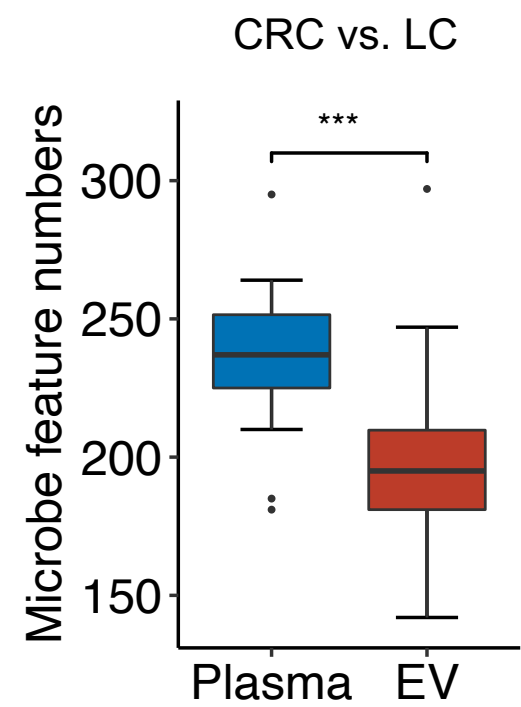

G

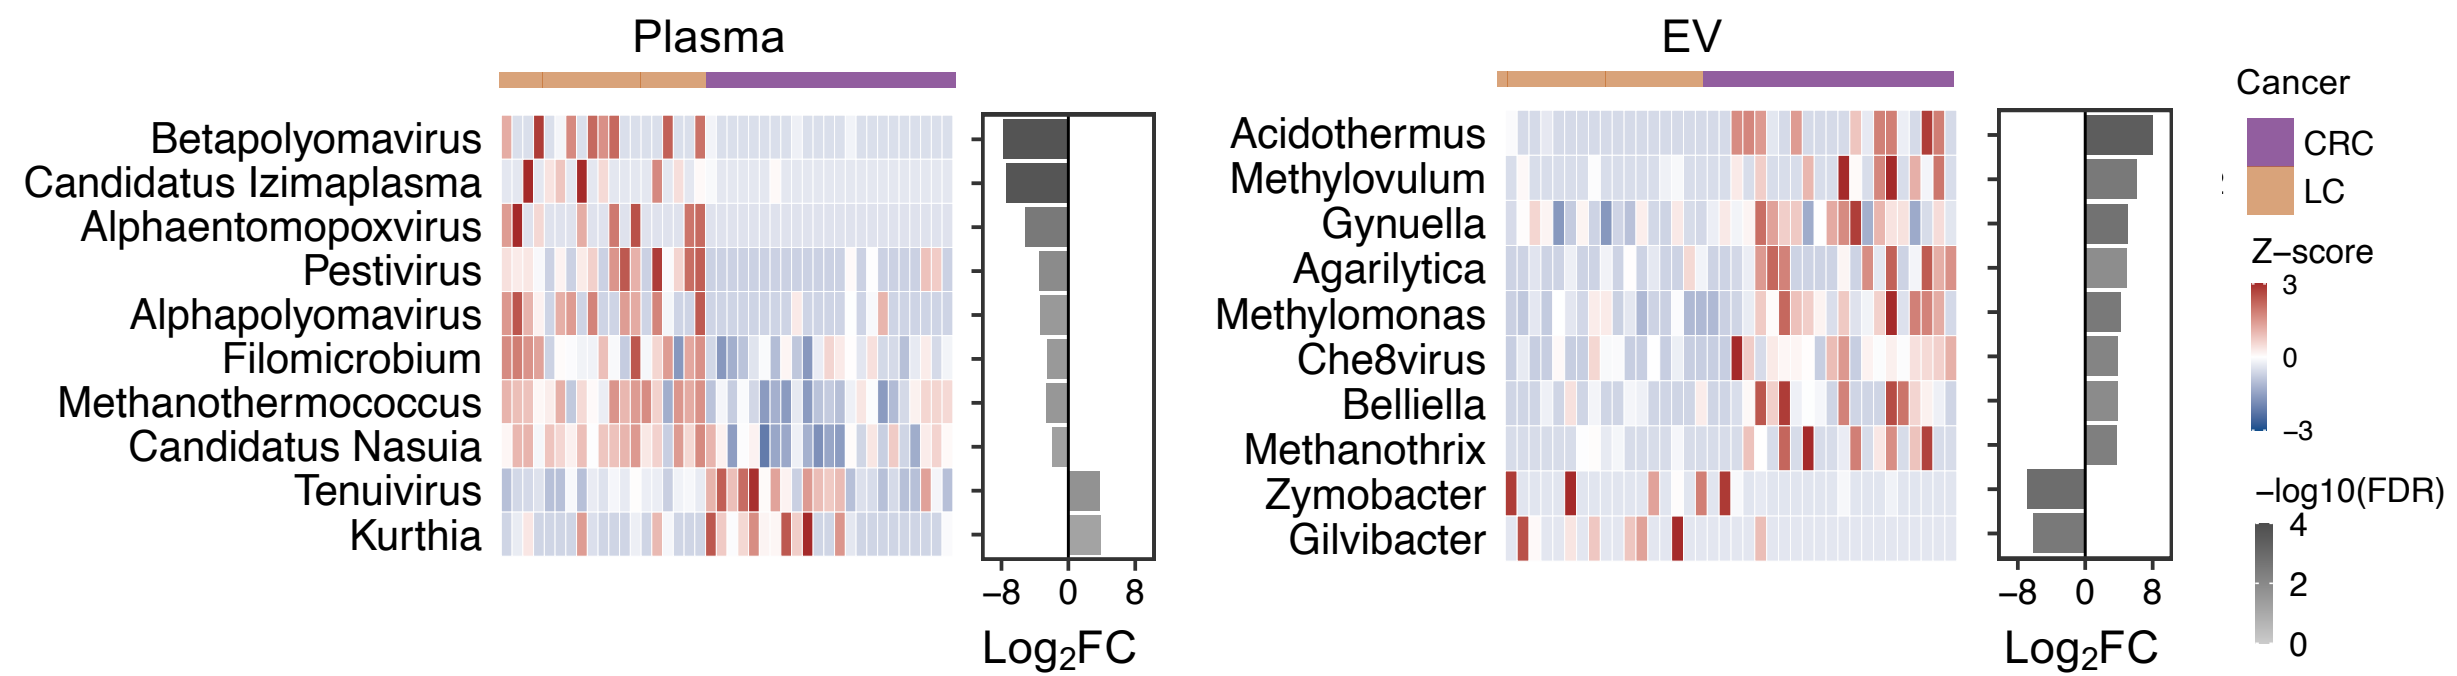



**Table 1. Practical guide for cfRNA-seq in human plasma**

|                                                                    | <b>Total cfRNA-seq<br/>(<i>Plasma</i> cfRNA-seq)</b> | <b><i>EV</i> cfRNA-seq</b>  |
|--------------------------------------------------------------------|------------------------------------------------------|-----------------------------|
| <b>EV Purification</b>                                             | <b>No</b>                                            | <b>Yes</b>                  |
| Cost of plasma volume, experimental time and reagents <sup>1</sup> | relatively less                                      | relatively more             |
| Enriched RNA species                                               | circRNA, tRNA, Y RNA                                 | mRNA, srpRNA                |
| Enriched microbes                                                  | viruses                                              | intestinimonas, etc.        |
| Diversity of cell-types-of-origin                                  | relatively low                                       | relatively high             |
| Cancer detection                                                   | good (AUC: 0.94)                                     | good (AUC: 0.95)            |
| Cancer type-specific microbes                                      | relatively more                                      | relatively less             |
| Cancer type classification                                         | relatively good (AUC: 0.90)                          | relatively poor (AUC: 0.77) |

<sup>1</sup> Different cost is due to the EV purification step.
